# Supplementary material for: Reversible Covalent Imine-Tethering for Selective Stabilization of 14-3-3 Hub Protein Interactions
Source: PubMed Central journal article supplement — J Am Chem Soc. 2021 May 28;143(22):8454–64. doi: 10.1021/jacs.1c03035 (PMC8193639; doi:10.1021/jacs.1c03035), 2021-05-28
Supplement: ja1c03035_si_001.pdf [file ja1c03035_si_001.pdf]

# Reversible Covalent Imine-Tethering for Selective Stabilization of 14-3-3 Hub Protein Interactions

Peter J Cossar<sup>1,#</sup>, Madita Wolter<sup>1,#</sup>, Lars van Dijck<sup>1</sup>, Dario Valenti<sup>1,2</sup>, Laura M. Levy<sup>2</sup>, Christian Ottmann<sup>1\*</sup> and Luc Brunsveld<sup>1\*</sup>

1. Laboratory of Chemical Biology, Department of Biomedical Engineering and Institute for Complex Molecular Systems, Eindhoven University of Technology, P.O. Box 513, 5600 MB Eindhoven (The Netherlands)

2. Taros Chemicals GmbH & Co. KG, Emil-Figge-Straße 76a, 44227 Dortmund (Germany)

*KEYWORDS* Protein-Protein Interactions, Fragment-based drug discovery, covalent reversible molecular glues, Pini, cooperativity

## Supporting Information

### Contents

|                                                 |    |
|-------------------------------------------------|----|
| Supplementary Figures and Tables .....          | 2  |
| Experimental Section – Biophysical Assays ..... | 16 |
| Experimental Section – Chemistry .....          | 17 |
| General materials .....                         | 17 |
| Synthetic Procedures and Characterization ..... | 18 |
| Compound Characterization .....                 | 18 |
| NMR Spectra .....                               | 25 |
| HPLC .....                                      | 78 |
| References .....                                | 80 |

## Supplementary Figures and Tables

**Table S1: The 14-3-3pred server allows the *in silico* analysis of potential 14-3-3 binding sites of Pin1.**

| Position | Peptide [-6:4] | ANN   | PSSM   | SVM    | Consensus | phosphoS/T |
|----------|----------------|-------|--------|--------|-----------|------------|
| 18       | EKRMSR[S]SGRV  | 0.655 | 0.376  | -0.187 | 0.281     | -          |
| 19       | KRMSRS[S]GRVY  | 0.236 | 0.172  | -0.741 | -0.111    | -          |
| 29       | YYFNHI[T]NASQ  | 0.112 | -0.118 | -1.135 | -0.380    | -          |
| 32       | NHITNA[S]QWER  | 0.344 | 0.017  | -1.048 | -0.229    | -          |
| 38       | SQWERP[S]GNSS  | 0.049 | -0.032 | -1.242 | -0.408    | -          |
| 41       | ERPSGN[S]SSGG  | 0.062 | -0.107 | -1.383 | -0.476    | -          |
| 42       | RPSGNS[S]SGGK  | 0.136 | -0.226 | -0.929 | -0.340    | -          |
| 43       | PSGNSS[S]GGKN  | 0.147 | 0.033  | -0.636 | -0.152    | -          |
| 58       | PARVRC[S]HLLV  | 0.525 | 0.332  | -0.614 | 0.081     | -          |
| 65       | HLLVKH[S]QSRR  | 0.142 | -0.013 | -1.085 | -0.319    | -          |
| 67       | LVKHSQ[S]RRPS  | 0.214 | -0.020 | -0.469 | -0.092    | -          |
| 71       | SQSRRP[S]SWRQ  | 0.552 | 0.712  | -0.128 | 0.379     | -          |
| 72       | QSRRPS[S]WRQE  | 0.583 | 0.821  | 0.370  | 0.591     | -          |
| 79       | WRQEKI[T]RTKE  | 0.118 | -0.035 | -1.168 | -0.362    | -          |
| 81       | QEKITR[T]KEEA  | 0.114 | -0.035 | -1.036 | -0.319    | -          |
| 98       | YIQKIK[S]GEED  | 0.519 | 0.214  | 0.162  | 0.298     | -          |
| 105      | GEEDFE[S]LASQ  | 0.159 | -0.151 | -1.308 | -0.433    | -          |
| 108      | DFESLA[S]QFSD  | 0.167 | -0.173 | -1.130 | -0.379    | -          |
| 111      | SLASQF[S]DCSS  | 0.062 | -0.163 | -1.479 | -0.527    | -          |
| 114      | SQFSDC[S]SAKA  | 0.069 | -0.328 | -1.607 | -0.622    | -          |
| 115      | QFSDCS[S]AKAR  | 0.248 | 0.007  | -0.605 | -0.117    | -          |
| 126      | GDLGAF[S]RGQM  | 0.262 | -0.048 | -0.479 | -0.088    | -          |
| 138      | KPFEDA[S]FALR  | 0.152 | -0.078 | -1.023 | -0.316    | -          |
| 143      | ASFALR[T]GEMS  | 0.050 | -0.369 | -1.800 | -0.706    | -          |
| 147      | LRTGEM[S]GPVF  | 0.528 | 0.730  | 0.209  | 0.489     | -          |
| 152      | MSGPVF[T]DSGI  | 0.200 | -0.067 | -0.747 | -0.205    | -          |
| 154      | GPVFTD[S]GIHI  | 0.131 | -0.120 | -0.970 | -0.320    | -          |
| 162      | IHIILR[T]E---  | 0.118 | 0.148  | -1.347 | -0.360    | -          |

**Table S2: Data collection and refinement statistics for binary peptide/14-3-3 $\sigma$ AC complex as indicated.** Data collection statistics, as reported by aimless, the refinement statistics were derived from the 'Table1' software of the phenix suite. Values in parenthesis represent the highest resolution shell.

|                                | <b>Pin1pS72</b>          | <b>AS160</b>             |
|--------------------------------|--------------------------|--------------------------|
| <b>PDB code</b>                | 7AOG                     | 7NIX                     |
| X-ray source                   | DESY, Petra III, P11     | DLS, I03                 |
| <b>Data Collection</b>         |                          |                          |
| Wavelength                     | 1.0332                   | 0.976284                 |
| Resolution range               | 62.65-1.5<br>(1.53-1.50) | 104.98-1.9<br>(1.94-1.9) |
| Space group                    | C2221                    | P6122                    |
| Unit cell                      |                          |                          |
| a, b, c (Å)                    | 82.43 112.06 62.65       | 121.22 121.22 74.46      |
| $\alpha, \beta, \gamma$ (°)    | 90.00 90.00 90.00        | 90.00 90.00 120.00       |
| Unique reflections             | 44552 (1508)             | 25949 (1623)             |
| Multiplicity                   | 10.5 (3.8)               | 37.5 (38.7)              |
| Completeness (%)               | 95.1 (64.3)              | 100 (100)                |
| Mean I/sigma(I)                | 20.1 (1.6)               | 25.4 (3.3)               |
| R-merge                        | 0.055 (0.736)            | 0.104 (1.550)            |
| R-meas                         | 0.058 (0.859)            | 0.105 (1.570)            |
| R-pim                          | 0.017 (0.425)            | 0.017 (0.252)            |
| CC1/2                          | 0.999 (0.527)            | 1.000 (0.970)            |
|                                |                          |                          |
| <b>Refinement</b>              |                          |                          |
| Reflections used in refinement | 44518 (3163)             | 25890 (2522)             |
| Reflections used for R-free    | 2152 (162)               | 1244 (117)               |
| R-work                         | 0.1653 (0.2470)          | 0.1856 (0.2706)          |
| R-free                         | 0.1843 (0.2549)          | 0.2041 (0.3141)          |
| No. of non-hydrogen atoms      | 2258                     | 2133                     |
| macromolecules                 | 1970                     | 1908                     |
| ligands                        | 4                        | 60                       |
| solvent                        | 284                      | 197                      |
| RMS (bonds)                    | 0.008                    | 0.005                    |
| RMS (angles)                   | 0.91                     | 0.81                     |
| Ramachandran favored (%)       | 97.87                    | 99.14                    |
| Ramachandran allowed (%)       | 2.13                     | 0.86                     |
| Ramachandran outliers (%)      | 0                        | 0                        |
| Rotamer outliers (%)           | 0                        | 0                        |
| Clashscore                     | 3.1                      | 1.32                     |
| Average B-factor               | 24.98                    | 34.39                    |
| macromolecules                 | 23.54                    | 33.34                    |
| ligands                        | 30.26                    | 49.65                    |
| solvent                        | 34.88                    | 42.4                     |

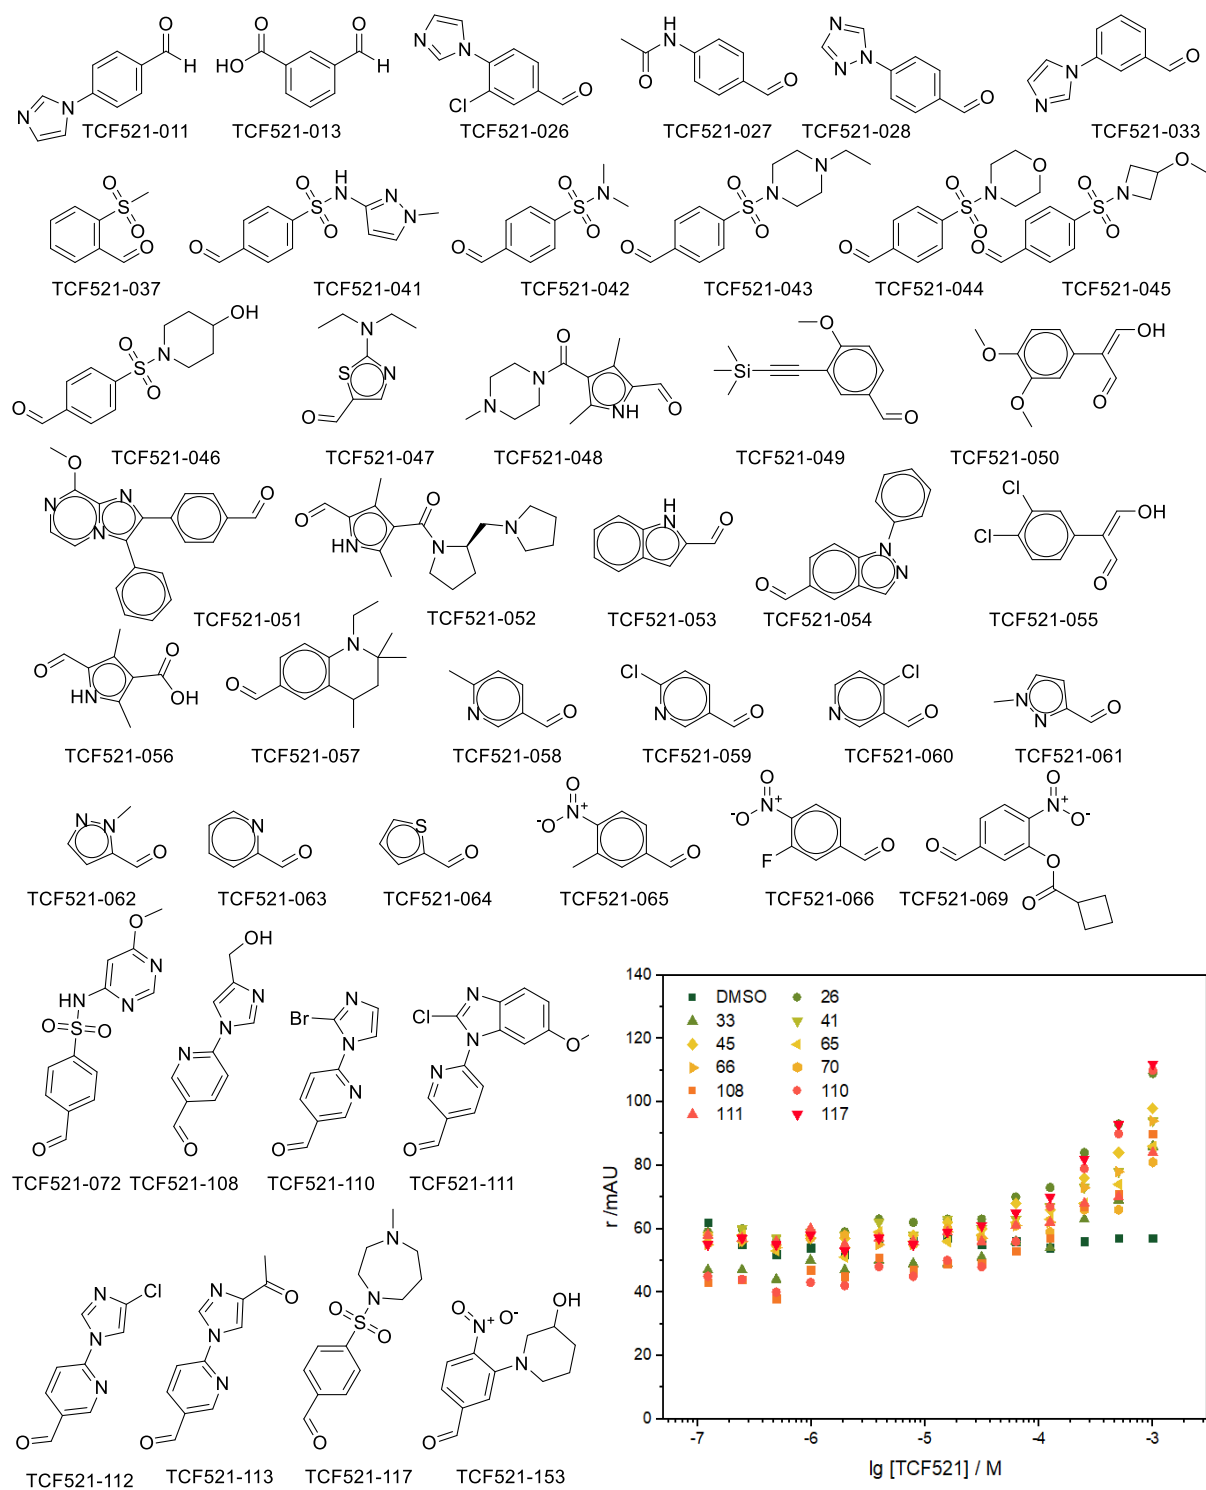

**Figure S1: Imine tethering screen of an aldehyde library revealed 11 hit fragments.** Stabilization of the Pin1<sub>72</sub>/14-3-3 $\sigma$  complex was tested with FA compound titrations in presence of 50  $\mu$ M 14-3-3 $\sigma$  and 100 nM Pin1<sub>72</sub>.

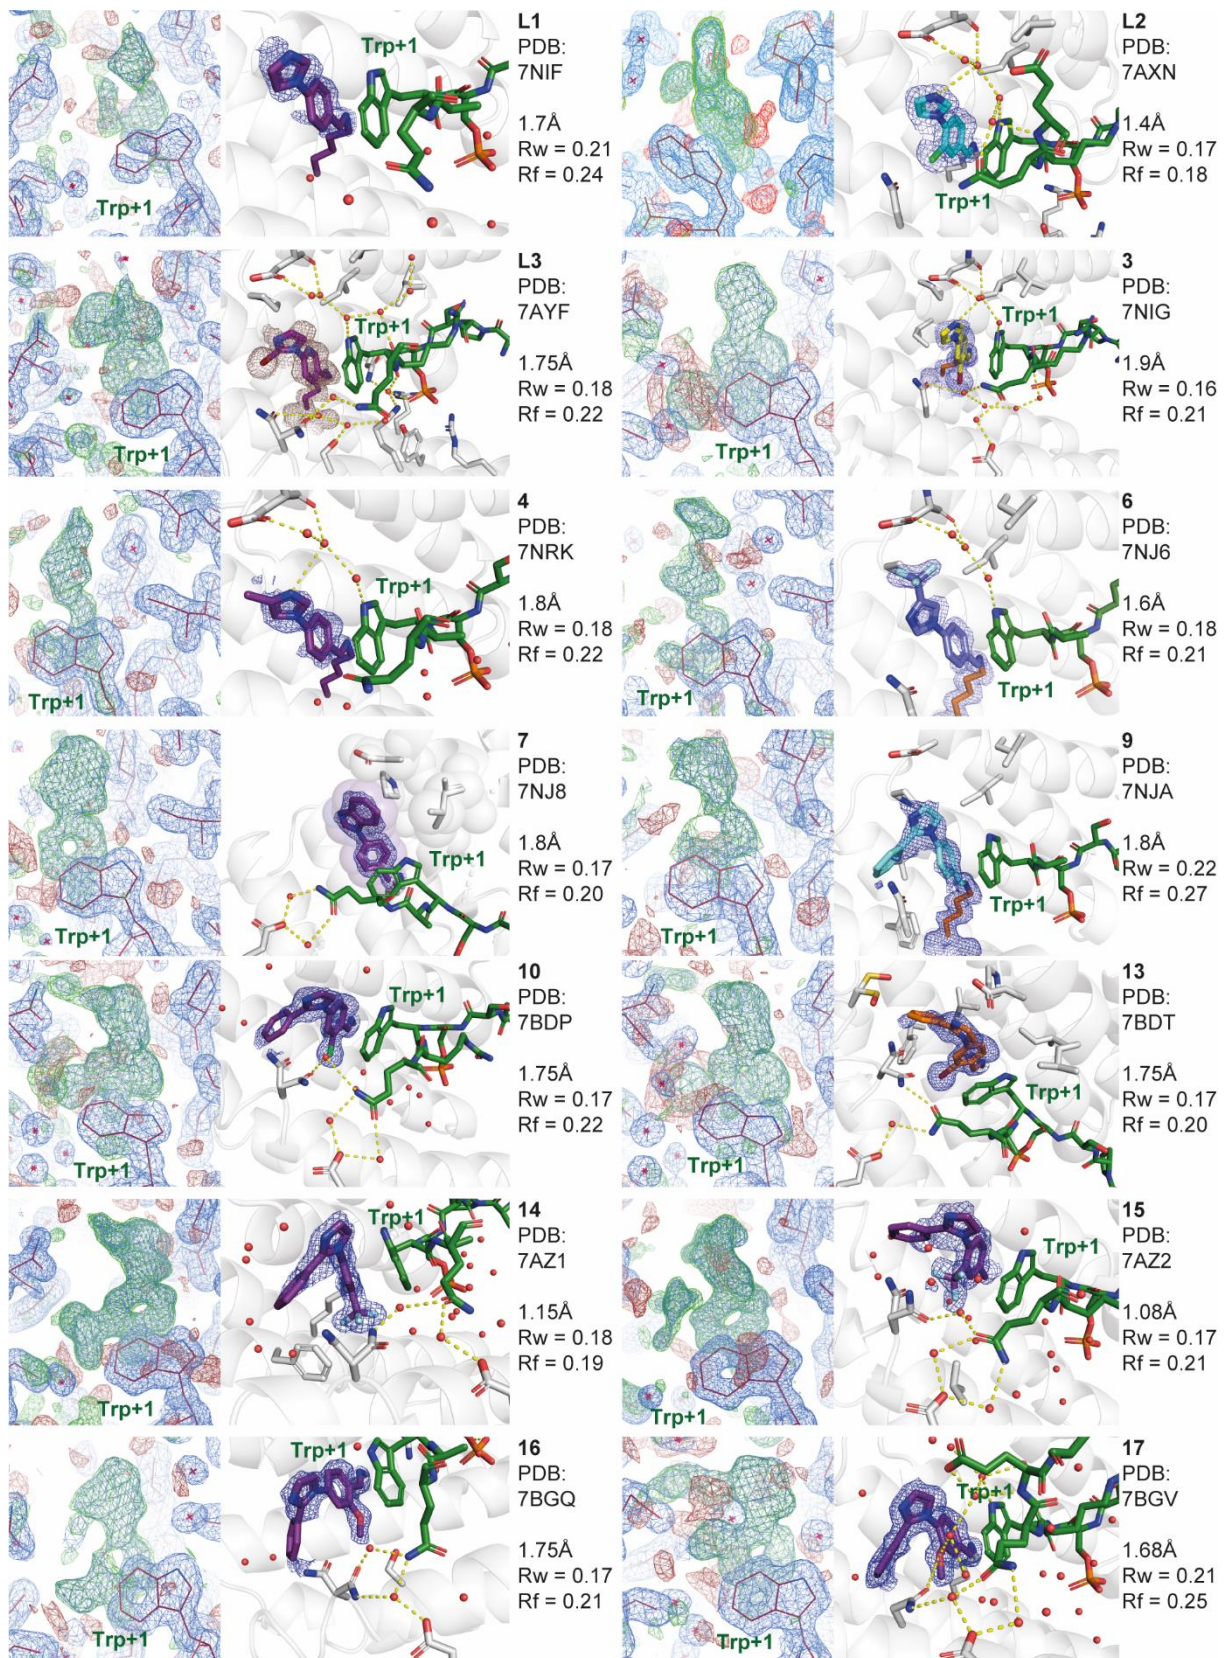

Figure S2 (continued on next page).

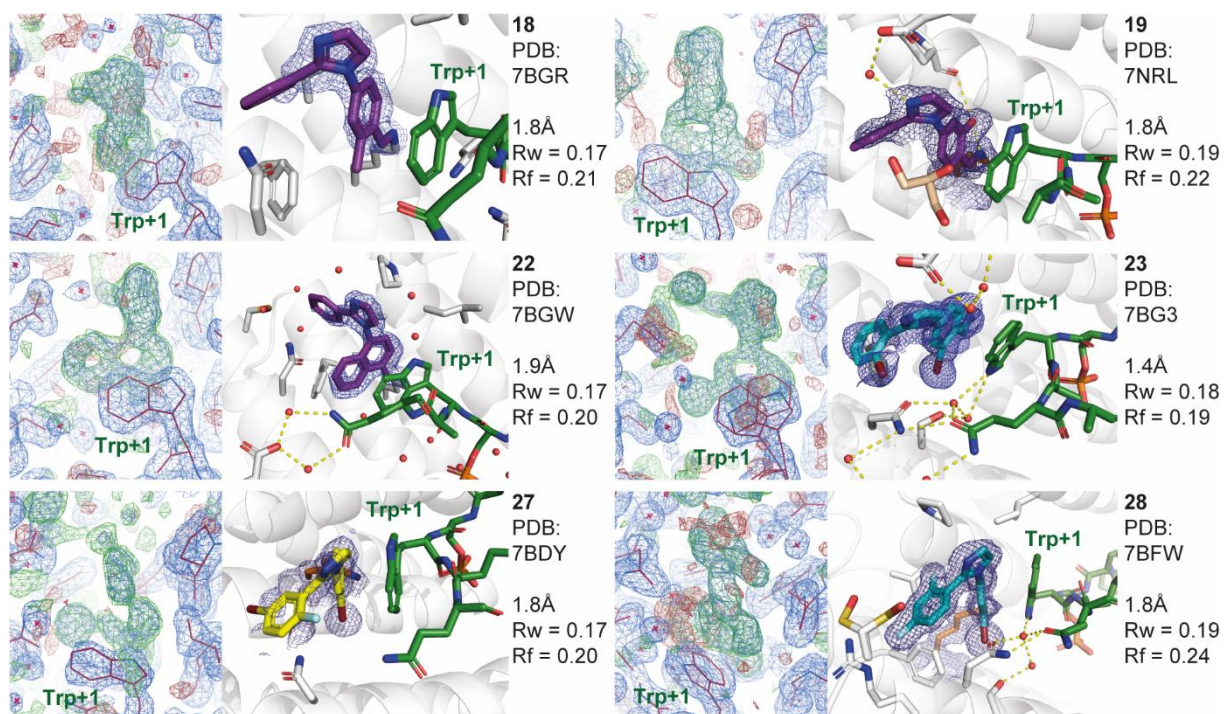

**Figure S2: Ternary crystal structures of fragment/Pin1\_72/14-3-3 $\sigma$  $\Delta$ C.** Chemical structure and biophysical activity of the fragments are listed in Table 1 and additional crystallographic statistics are listed in Table S3. Indicated are the unbiased electron density in absence of fragment coordinates as provided by coot (left, blue 2Fo-Fc map: rmsd=1, green/red Fo-Fc map: rmsd= 2.5), the binding pose of the in-built fragment (middle, colour legend see below) and the compound number, PDB ID, high-resolution limit,  $R_{work}$  (Rw) and  $R_{free}$  (Rf) (right). 14-3-3 $\sigma$  $\Delta$ C: white cartoon and sticks; Pin1\_72: green cartoon; water: red spheres; hydrogen bonds: yellow dashes. 2Fo-Fc electron density map at 1 $\sigma$ : blue mesh.

**Table S3: Data collection and refinement statistics for ternary Pin1\_72/14-3 $\sigma$ AC/fragment complex as indicated.** Data collection statistics, as reported by aimless, the refinement statistics were derived from the 'Table1' software of the phenix suite. Values in parenthesis represent the highest resolution shell.

| Compound number                | L1                        | L2                       | L3                        | 3                         | 4                         | 6                         |
|--------------------------------|---------------------------|--------------------------|---------------------------|---------------------------|---------------------------|---------------------------|
| PDB code                       | 7NIF                      | 7AXN                     | 7AYF                      | 7NIG                      | 7NRK                      | 7NJ6                      |
| X-ray source                   | homesource                | DLS, I03                 | homesource                | homesource                | homesource                | homesource                |
| <b>Data Collection</b>         |                           |                          |                           |                           |                           |                           |
| Wavelength                     | 1.54187                   | 0.97625                  | 1.54187                   | 1.54187                   | 1.54187                   | 1.54187                   |
| Resolution range               | 33.19-1.71<br>(1.74-1.71) | 66.16-1.4<br>(1.42-1.40) | 33.16-1.75<br>(1.78-1.75) | 41.68-1.90<br>(1.93-1.90) | 33.98-1.75<br>(1.78-1.75) | 33.16-1.59<br>(1.61-1.59) |
| Space group                    | C2221                     | C2221                    | C2221                     | C2221                     | C2221                     | C2221                     |
| Unit cell                      |                           |                          |                           |                           |                           |                           |
| a, b, c (Å)                    | 82.39 112.05<br>62.53     | 82.03 111.94<br>62.47    | 82.31 112.00<br>62.67     | 82.09 111.58<br>62.69     | 82.25 111.96<br>62.45     | 82.33 111.91<br>62.59     |
| $\alpha, \beta, \gamma$ (°)    | 90.00 90.00<br>90.00      | 90.00 90.00<br>90.00     | 90.00 90.00<br>90.00      | 90.00 90.00<br>90.00      | 90.00 90.00<br>90.00      | 90.00 90.00<br>90.00      |
| Unique reflections             | 29170 (761)               | 54952 (2050)             | 28956 (1089)              | 22988 (1103)              | 28225 (1321)              | 32592 (99)                |
| Multiplicity                   | 5.8 (3.5)                 | 1.9 (1.9)                | 6.0 (3.7)                 | 6.3 (5.7)                 | 6.1 (3.5)                 | 5.6 (1.1)                 |
| Completeness (%)               | 92.6 (48.7)               | 96.6 (73.8)              | 98.1 (74.0)               | 99.9 (97.5)               | 96.0 (82.3)               | 82.5 (5.1)                |
| Mean I/sigma(I)                | 5.7 (1.1)                 | 16.2 (2.1)               | 7.9 (1.8)                 | 16.5 (5.9)                | 13.2 (2.3)                | 14.1 (1.7)                |
| R-merge                        | 0.210 (0.779)             | 0.014 (0.241)            | 0.161 (0.641)             | 0.082 (0.286)             | 0.099 (0.468)             | 0.082 (0.222)             |
| R-meas                         | 0.231 (0.919)             | 0.020 (0.341)            | 0.176 (0.738)             | 0.089 (0.315)             | 0.109 (0.548)             | 0.089 (0.314)             |
| R-pim                          | 0.129 (0.588)             | 0.014 (0.241)            | 0.070 (0.356)             | 0.035 (0.131)             | 0.043 (0.279)             | 0.036 (0.222)             |
| CC1/2                          | 0.987 (0.549)             | 1.000 (0.870)            | 0.993 (0.673)             | 0.998 (0.956)             | 0.997 (0.838)             | 0.998 (0.927)             |
| <b>Refinement</b>              |                           |                          |                           |                           |                           |                           |
| Reflections used in refinement | 29124 (1693)              | 54936 (4297)             | 28932 (2351)              | 22968 (2228)              | 28193 (2430)              | 32565 (483)               |
| Reflections used for R-free    | 1461 (83)                 | 2722 (234)               | 1482 (119)                | 1185 (103)                | 1409 (121)                | 1628 (25)                 |
| R-work                         | 0.2109<br>(0.2671)        | 0.1655<br>(0.2436)       | 0.1752<br>(0.2182)        | 0.1649<br>(0.1739)        | 0.1829<br>(0.2411)        | 0.1814<br>(0.2495)        |
| R-free                         | 0.2392<br>(0.3134)        | 0.1822<br>(0.2639)       | 0.2176<br>(0.2674)        | 0.2053<br>(0.2133)        | 0.2157<br>(0.2693)        | 0.2070<br>(0.3067)        |
| Number of non-hydrogen atoms   | 2239                      | 2403                     | 2297                      | 2261                      | 2200                      | 2283                      |
| macromolecules                 | 1883                      | 2045                     | 1904                      | 1924                      | 1865                      | 1918                      |
| ligands                        | 15                        | 18                       | 14                        | 16                        | 29                        | 17                        |
| solvent                        | 341                       | 340                      | 379                       | 321                       | 306                       | 348                       |
| RMS (bonds)                    | 0.004                     | 0.015                    | 0.006                     | 0.005                     | 0.004                     | 0.003                     |
| RMS (angles)                   | 0.69                      | 1.37                     | 0.76                      | 0.81                      | 0.7                       | 0.61                      |
| Ramachandran favored (%)       | 97.76                     | 97.84                    | 98.21                     | 98.21                     | 98.2                      | 98.2                      |
| Ramachandran allowed (%)       | 2.24                      | 2.16                     | 1.79                      | 1.79                      | 1.8                       | 1.8                       |
| Ramachandran outliers (%)      | 0                         | 0                        | 0                         | 0                         | 0                         | 0                         |
| Rotamer outliers (%)           | 0                         | 0                        | 0                         | 0                         | 0                         | 0                         |
| Clashscore                     | 3.76                      | 1.73                     | 1.06                      | 2.88                      | 1.35                      | 1.84                      |
| Average B-factor               | 14.89                     | 21.94                    | 15.03                     | 14.89                     | 14.77                     | 15.37                     |
| macromolecules                 | 12.84                     | 20.1                     | 12.51                     | 12.86                     | 12.73                     | 13.13                     |
| ligands                        | 33.17                     | 25.73                    | 29.04                     | 21.47                     | 35.66                     | 39.9                      |
| solvent                        | 25.37                     | 32.78                    | 27.17                     | 26.69                     | 25.22                     | 26.5                      |

**Table S3 (continued): Data collection and refinement statistics for ternary Pin1<sub>72/14-3-3</sub>ΔC/fragment complex as indicated.** Data collection statistics, as reported by aimless, the refinement statistics were derived from the 'Table1' software of the phenix suite. Values in parenthesis represent the highest resolution shell.

| Compound number                | 7                         | 9                         | 10                        | 13                        | 14                        | 15                        |
|--------------------------------|---------------------------|---------------------------|---------------------------|---------------------------|---------------------------|---------------------------|
| PDB code                       | 7NJ8                      | 7NJA                      | 7BDP                      | 7BDT                      | 7AZ1                      | 7AZ2                      |
| X-ray source                   | homesource                | homesource                | homesource                | homesource                | DLS, I03                  | DLS, I03                  |
| <b>Data Collection</b>         |                           |                           |                           |                           |                           |                           |
| Wavelength                     | 1.54187                   | 1.54187                   | 1.54187                   | 1.54187                   | 0.97627                   | 0.97627                   |
| Resolution range               | 34.07-1.80<br>(1.83-1.80) | 25.58-1.75<br>(1.78-1.75) | 41.63-1.75<br>(1.78-1.75) | 33.97-1.75<br>(1.78-1.75) | 45.44-1.15<br>(1.17-1.15) | 66.24-1.08<br>(1.10-1.08) |
| Space group                    | C2221                     | C2221                     | C2221                     | C2221                     | C2221                     | C2221                     |
| <b>Unit cell</b>               |                           |                           |                           |                           |                           |                           |
| a, b, c (Å)                    | 82.39 112.24<br>62.58     | 82.40 112.10<br>62.62     | 81.99 111.69<br>62.46     | 82.10 111.95<br>62.57     | 82.25 111.75<br>62.46     | 82.14 112.02<br>62.46     |
| α, β, γ (°)                    | 90.00 90.00<br>90.00      |
| Unique reflections             | 26776 (1261)              | 28879 (1275)              | 28431 (1383)              | 26997 (888)               | 101961<br>(4964)          | 119445<br>(4601)          |
| Multiplicity                   | 6.2 (5.1)                 | 5.5 (3.3)                 | 6.1 (3.3)                 | 6.4 (5.2)                 | 1.9 (2.0)                 | 1.9 (2.0)                 |
| Completeness (%)               | 98.4 (92.4)               | 97.5 (78.6)               | 97.1 (86.8)               | 91.9 (56.6)               | 100.0 (99.6)              | 97.4 (76.9)               |
| Mean I/sigma(I)                | 17.7 (4.8)                | 5.5 (1.1)                 | 17.3 (2.8)                | 16.2 (3.3)                | 11.8 (1.5)                | 14.1 (1.2)                |
| R-merge                        | 0.069 (0.292)             | 0.231 (0.737)             | 0.074 (0.401)             | 0.086 (0.449)             | 0.017 (0.386)             | 0.027 (0.684)             |
| R-meas                         | 0.075 (0.324)             | 0.254 (0.871)             | 0.080 (0.476)             | 0.094 (0.496)             | 0.024 (0.546)             | 0.039 (0.967)             |
| R-pim                          | 0.041 (0.185)             | 0.104 (0.449)             | 0.032 (0.251)             | 0.036 (0.205)             | 0.017 (0.386)             | 0.027 (0.684)             |
| CC1/2                          | 0.999 (0.952)             | 0.983 (0.453)             | 0.999 (0.836)             | 0.998 (0.865)             | 1.000 (0.737)             | 0.999 (0.425)             |
|                                |                           |                           |                           |                           |                           |                           |
| <b>Refinement</b>              |                           |                           |                           |                           |                           |                           |
| Reflections used in refinement | 26759 (2512)              | 28844 (2401)              | 28411 (2540)              | 26989 (1826)              | 101942<br>(10061)         | 119245<br>(9834)          |
| Reflections used for R-free    | 1356 (127)                | 1472 (138)                | 1427 (124)                | 1349 (90)                 | 5038 (481)                | 5967 (514)                |
| R-work                         | 0.1709<br>(0.1856)        | 0.2204<br>(0.3435)        | 0.1725<br>(0.2553)        | 0.1694<br>(0.2143)        | 0.1827<br>(0.2843)        | 0.1846<br>(0.3308)        |
| R-free                         | 0.2006<br>(0.2225)        | 0.2659<br>(0.4053)        | 0.2164<br>(0.3028)        | 0.2015<br>(0.2572)        | 0.1925<br>(0.2969)        | 0.1973<br>(0.3373)        |
| Number of non-hydrogen atoms   | 2278                      | 2244                      | 2247                      | 2297                      | 2380                      | 2364                      |
| macromolecules                 | 1908                      | 1880                      | 1899                      | 1941                      | 2011                      | 1987                      |
| ligands                        | 18                        | 19                        | 20                        | 20                        | 25                        | 25                        |
| solvent                        | 352                       | 345                       | 328                       | 336                       | 344                       | 352                       |
| RMS(bonds)                     | 0.008                     | 0.007                     | 0.006                     | 0.006                     | 0.005                     | 0.005                     |
| RMS(angles)                    | 0.95                      | 0.88                      | 0.8                       | 0.82                      | 0.76                      | 0.73                      |
| Ramachandran favored (%)       | 98.2                      | 98.2                      | 98.21                     | 98.21                     | 97.8                      | 98.22                     |
| Ramachandran allowed (%)       | 1.8                       | 1.8                       | 1.79                      | 1.79                      | 2.2                       | 1.78                      |
| Ramachandran outliers (%)      | 0                         | 0                         | 0                         | 0                         | 0                         | 0                         |
| Rotamer outliers (%)           | 0.5                       | 0                         | 0                         | 0                         | 0.47                      | 0                         |
| Clashscore                     | 2.65                      | 3.22                      | 3.98                      | 3.37                      | 3                         | 2.28                      |
| Average B-factor               | 15.97                     | 14.03                     | 16.83                     | 16.82                     | 19.5                      | 21.12                     |
| macromolecules                 | 13.74                     | 11.81                     | 14.8                      | 14.75                     | 17.24                     | 18.61                     |
| ligands                        | 26.85                     | 36.59                     | 21.6                      | 23.34                     | 26.15                     | 40.63                     |
| solvent                        | 27.49                     | 24.85                     | 28.31                     | 28.38                     | 32.24                     | 33.92                     |



**Table S3 (continued): Data collection and refinement statistics for ternary Pin1<sub>72/14-3-3</sub>ΔC/fragment complex as indicated.** Data collection statistics, as reported by aimless, the refinement statistics were derived from the 'Table1' software of the phenix suite. Values in parenthesis represent the highest resolution shell.

| Compound number                | 16                        | 17                        | 18                      | 19                        | 22                        | 23                       |
|--------------------------------|---------------------------|---------------------------|-------------------------|---------------------------|---------------------------|--------------------------|
| PDB code                       | 7BGQ                      | 7BGV                      | 7BGR                    | 7NRL                      | 7BGW                      | 7BG3                     |
| X-ray source                   | homesource                | homesource                | homesource              | homesource                | homesource                | DESY, Petra III, P11     |
| <b>Data Collection</b>         |                           |                           |                         |                           |                           |                          |
| Wavelength                     | 1.54187                   | 1.54187                   | 1.54187                 | 1.54187                   | 1.54187                   | 1.0332                   |
| Resolution range               | 34.36-1.75<br>(1.78-1.75) | 41.26-1.68<br>(1.71-1.68) | 34.32-1.8<br>(1.84-1.8) | 41.26-1.80<br>(1.85-1.80) | 34.42-1.90<br>(1.94-1.90) | 66.29-1.4<br>(1.42-1.40) |
| Space group                    | C2221                     | C2221                     | C2221                   | C2221                     | C2221                     | C2221                    |
| <b>Unit cell</b>               |                           |                           |                         |                           |                           |                          |
| a, b, c (Å)                    | 82.30 111.93<br>62.43     | 82.51 112.53<br>62.78     | 82.19 111.68<br>62.39   | 82.53 112.48<br>62.52     | 82.45 111.79<br>62.56     | 82.15 112.21<br>62.80    |
| α, β, γ (°)                    | 90.00 90.00<br>90.00      | 90.00 90.00<br>90.00      | 90.00 90.00<br>90.00    | 90.00 90.00<br>90.00      | 90.00 90.00<br>90.00      | 90.00 90.00<br>90.00     |
| Unique reflections             | 29095 (1337)              | 31746 (1012)              | 26985 (1548)            | 27292 (1947)              | 22305 (1370)              | 57149 (2617)             |
| Multiplicity                   | 5.9 (3.4)                 | 5.4 (1.8)                 | 6.1 (4.8)               | 6.0 (4.5)                 | 6.5 (6.2)                 | 12.1 (7.1)               |
| Completeness (%)               | 98.8 (82.8)               | 94.8 (61.5)               | 99.9 (98.1)             | 99.8 (97.7)               | 96.4 (92.5)               | 99.6 (93.8)              |
| Mean I/sigma(I)                | 15.6 (4.0)                | 5.7 (0.9)                 | 16.8 (4.2)              | 12.1 (3.2)                | 13.3 (7.2)                | 21.7 (2.5)               |
| R-merge                        | 0.070 (0.278)             | 0.145 (0.646)             | 0.076 (0.316)           | 0.100 (0.410)             | 0.094 (0.362)             | 0.056 (0.692)            |
| R-meas                         | 0.076 (0.323)             | 0.175 (0.912)             | 0.083 (0.355)           | 0.109 (0.464)             | 0.102 (0.394)             | 0.058 (0.692)            |
| R-pim                          | 0.030 (0.161)             | 0.096 (0.644)             | 0.033 (0.159)           | 0.044 (0.212)             | 0.039 (0.154)             | 0.016 (0.251)            |
| CC1/2                          | 0.999 (0.936)             | 0.991 (0.681)             | 0.998 (0.933)           | 0.997 (0.895)             | 0.997 (0.876)             | 0.999 (0.847)            |
| <b>Refinement</b>              |                           |                           |                         |                           |                           |                          |
| Reflections used in refinement | 29049 (2543)              | 31700 (2300)              | 26955 (2636)            | 27208 (2608)              | 22296 (2109)              | 57119 (5412)             |
| Reflections used for R-free    | 1454 (129)                | 1653 (132)                | 1359 (149)              | 1377 (119)                | 1148 (94)                 | 2838 (287)               |
| R-work                         | 0.1713<br>(0.2091)        | 0.2130<br>(0.2863)        | 0.1699<br>(0.2155)      | 0.1860<br>(0.2473)        | 0.1723<br>(0.2152)        | 0.1770<br>(0.2486)       |
| R-free                         | 0.2076<br>(0.2533)        | 0.2456<br>(0.3039)        | 0.2110<br>(0.2506)      | 0.2249<br>(0.2953)        | 0.2030<br>(0.2399)        | 0.1896<br>(0.2593)       |
| Number of non-hydrogen atoms   | 2310                      | 2250                      | 2230                    | 2304                      | 2236                      | 2353                     |
| macromolecules                 | 1926                      | 1888                      | 1898                    | 1909                      | 1863                      | 2022                     |
| ligands                        | 24                        | 23                        | 21                      | 84                        | 26                        | 22                       |
| solvent                        | 360                       | 339                       | 311                     | 311                       | 347                       | 309                      |
| RMS(bonds)                     | 0.006                     | 0.002                     | 0.006                   | 0.012                     | 0.006                     | 0.006                    |
| RMS(angles)                    | 0.79                      | 0.45                      | 0.77                    | 1.13                      | 0.76                      | 0.79                     |
| Ramachandran favored (%)       | 98.21                     | 98.23                     | 98.21                   | 98.21                     | 97.76                     | 97.37                    |
| Ramachandran allowed (%)       | 1.79                      | 1.77                      | 1.79                    | 1.79                      | 2.24                      | 2.63                     |
| Ramachandran outliers (%)      | 0                         | 0                         | 0                       | 0                         | 0                         | 0                        |
| Rotamer outliers (%)           | 0                         | 0                         | 0                       | 0                         | 0                         | 0                        |
| Clashscore                     | 2.6                       | 1.86                      | 3.97                    | 6.16                      | 1.62                      | 2.74                     |
| Average B-factor               | 16.39                     | 17.06                     | 16.47                   | 16.66                     | 14.32                     | 21.34                    |
| macromolecules                 | 13.99                     | 15.23                     | 14.47                   | 13.98                     | 12.12                     | 19.65                    |
| ligands                        | 31.53                     | 19.6                      | 31.96                   | 42.24                     | 26.41                     | 29.21                    |
| solvent                        | 28.26                     | 27.06                     | 27.64                   | 26.14                     | 25.22                     | 31.87                    |

**Table S3 (continued): Data collection and refinement statistics for ternary Pin1\_72/14-3-3 $\alpha$ C/fragment complex as indicated.** Data collection statistics, as reported by aimless, the refinement statistics were derived from the 'Table1' software of the phenix suite. Values in parenthesis represent the highest resolution shell.

| Compound Number                | 27                      | 28                       |
|--------------------------------|-------------------------|--------------------------|
| PDB code                       | 7BDY                    | 7BFW                     |
| X-ray source                   | homesource              | homesource               |
| <b>Data Collection</b>         |                         |                          |
| Wavelength                     | 1.54187                 | 1.54187                  |
| Resolution range               | 41.15-1.8<br>(1.85-1.8) | 40.98-1.8<br>(1.85-1.80) |
| Space group                    | C2221                   | C2221                    |
| Unit cell                      |                         |                          |
| a, b, c (Å)                    | 82.19 111.89<br>62.49   | 81.96 112.15<br>62.53    |
| $\alpha, \beta, \gamma$ (°)    | 90.00 90.00<br>90.00    | 90.00 90.00<br>90.00     |
| Unique reflections             | 26632 (1829)            | 26869 (1895)             |
| Multiplicity                   | 6.2 (5.3)               | 5.2 (4.1)                |
| Completeness (%)               | 98.4 (93.6)             | 99.2 (96.7)              |
| Mean I/ $\sigma$ (I)           | 24.3 (8.9)              | 6.7 (1.3)                |
| R-merge                        | 0.050 (0.149)           | 0.153 (0.698)            |
| R-meas                         | 0.54 (0.165)            | 0.170 (0.796)            |
| R-pim                          | 0.021 (0.069)           | 0.072 (0.373)            |
| CC1/2                          | 0.999 (0.988)           | 0.989 (0.861)            |
|                                |                         |                          |
| <b>Refinement</b>              |                         |                          |
| Reflections used in refinement | 26620 (2496)            | 26833 (2557)             |
| Reflections used for R-free    | 1347 (124)              | 1320 (131)               |
| R-work                         | 0.1658<br>(0.1909)      | 0.1898<br>(0.3161)       |
| R-free                         | 0.1991<br>(0.2517)      | 0.2405<br>(0.3619)       |
| Number of non-hydrogen atoms   | 2340                    | 2385                     |
| macromolecules                 | 1950                    | 1978                     |
| ligands                        | 24                      | 23                       |
| solvent                        | 366                     | 384                      |
| RMS(bonds)                     | 0.007                   | 0.007                    |
| RMS(angles)                    | 0.81                    | 0.82                     |
| Ramachandran favored (%)       | 98.24                   | 98.25                    |
| Ramachandran allowed (%)       | 1.76                    | 1.75                     |
| Ramachandran outliers (%)      | 0                       | 0                        |
| Rotamer outliers (%)           | 0                       | 0                        |
| Clashscore                     | 2.58                    | 3.56                     |
| Average B-factor               | 14.23                   | 13                       |
| macromolecules                 | 11.61                   | 10.92                    |
| ligands                        | 63.79                   | 12.03                    |

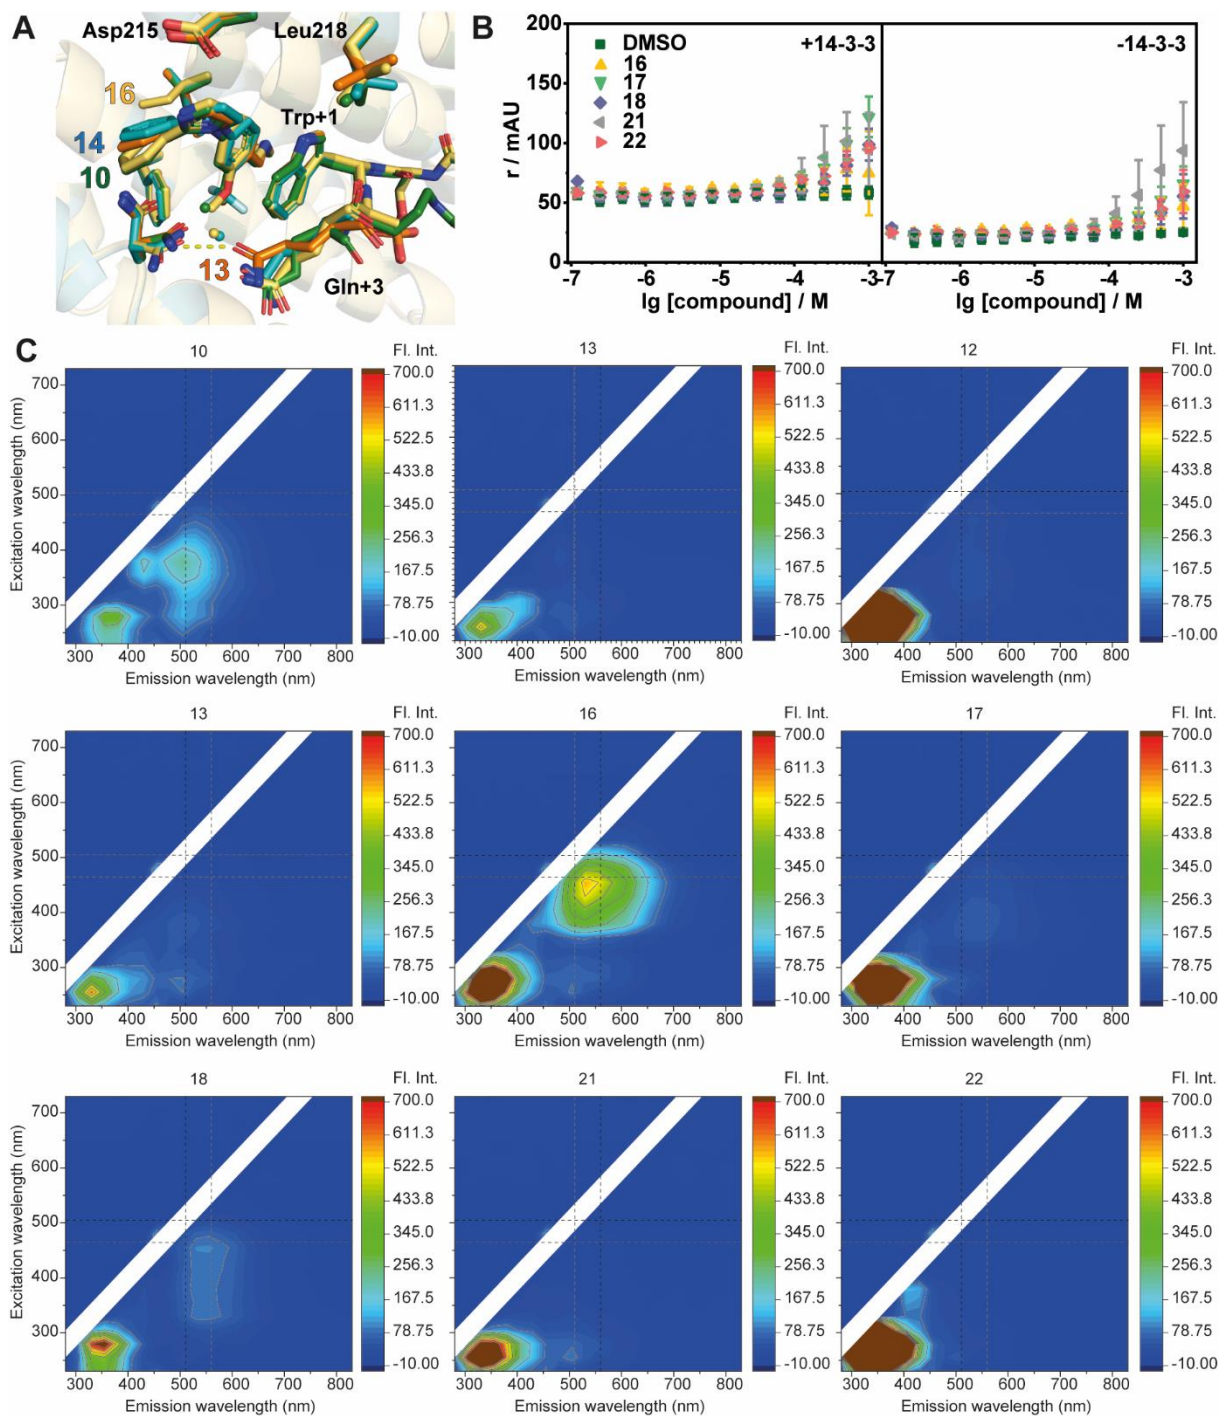

**Figure S3: Details of fragments listed in Table 1.** (A) Overlay of fragments **10** (green sticks), **13** (orange sticks), **14** (teal sticks) and **16** (yellow sticks) in complex with Pin1<sub>72</sub>/14-3-3 $\sigma\Delta$ C. (B) FA compound titrations show assay interference for **10**, **16**, **18**, **21**, **22** as the anisotropy increases in the absence of 14-3-3 $\gamma$  (-14-3-3) to a similar extent as with 14-3-3 $\gamma$  (+14-3-3). (C) Auto-fluorescence of compounds. Excitation/emission spectra of the fragments at a concentration of 1 mM. Spectra were measured for an  $\lambda_{\text{excitation}}$ -range of 230 to 730 nm and an  $\lambda_{\text{emission}}$ -range of 280 to 830 nm.

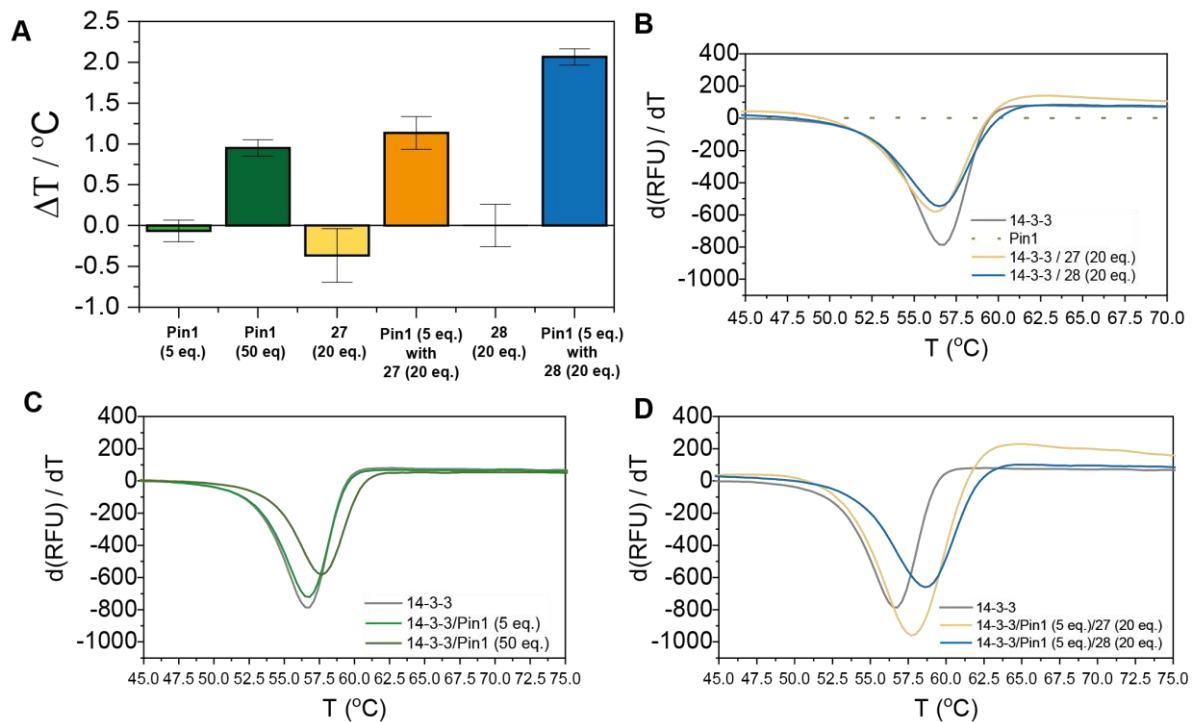

**Figure S4:** Thermal shift experiment with 14-3-3 $\gamma$ . **(A)** Shown are the changes in melting temperature of 14-3-3 $\gamma$  with addition of 5 equivalents (eq.) of Pin1 peptide (light green), 50 eq. Pin1 peptide (Dark green) and 20 eq. Fragment 27 (yellow). Notably, addition of 20 eq. of **28** resulted in no change in melting temperature. Additionally, change in melting temperature for 14-3-3/Pin1/**27** (orange) and 14-3-3/Pin1/**28** (blue) is also shown. Values are given as the mean average and standard deviations ( $n=3$ ) of three separate experiments performed using technical triplicates. **(B)** Differential melting curve of 14-3-3 $\gamma$ , Pin1 peptide, 20 eq. of **27** or **28** in the presence of 14-3-3 $\gamma$ . **(C)** Differential melting curve of 14-3-3 $\gamma$ , binary 14-3-3/Pin1 complex at 5 and 50 eq of Pin1 peptide. **(D)** Differential melting curve of 14-3-3 $\gamma$ , ternary 14-3-3/Pin1/fragment complex with 20 eq. fragment **27** or **28**. Differential melting curve are given as the mean average of one experiment.

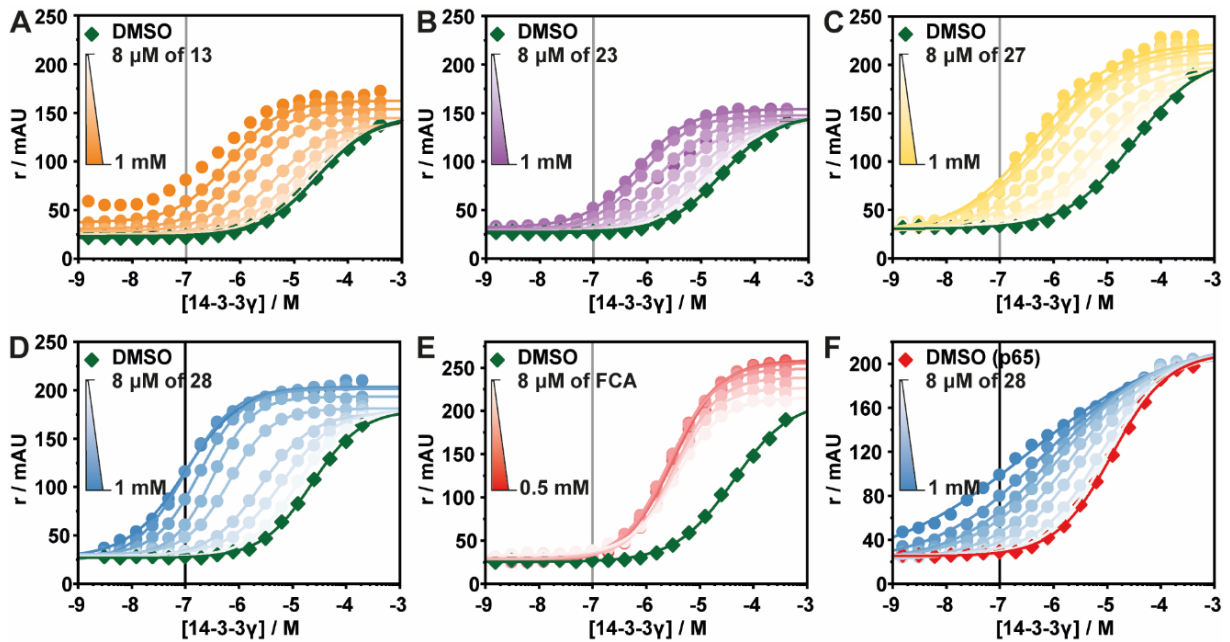

**Figure S5:** 2D Titrations of fragment **13**, **23**, **27** and **28** with Pin1\_72 or p65\_45 peptide and 14-3-3 $\gamma$ . Concentrations of fragment and 14-3-3 as indicated and 100nM Pin1\_72 (n=1). (A) 2D titration of **13** with Pin1\_72. (B) 2D titration of **14** with Pin1\_72. (C) 2D titration of **27** with Pin1\_72. (D) 2D titration of **28** with Pin1\_72. (E) 2D titration of FCA with Pin1\_72. (F) 2D titration of **28** with p65\_45.

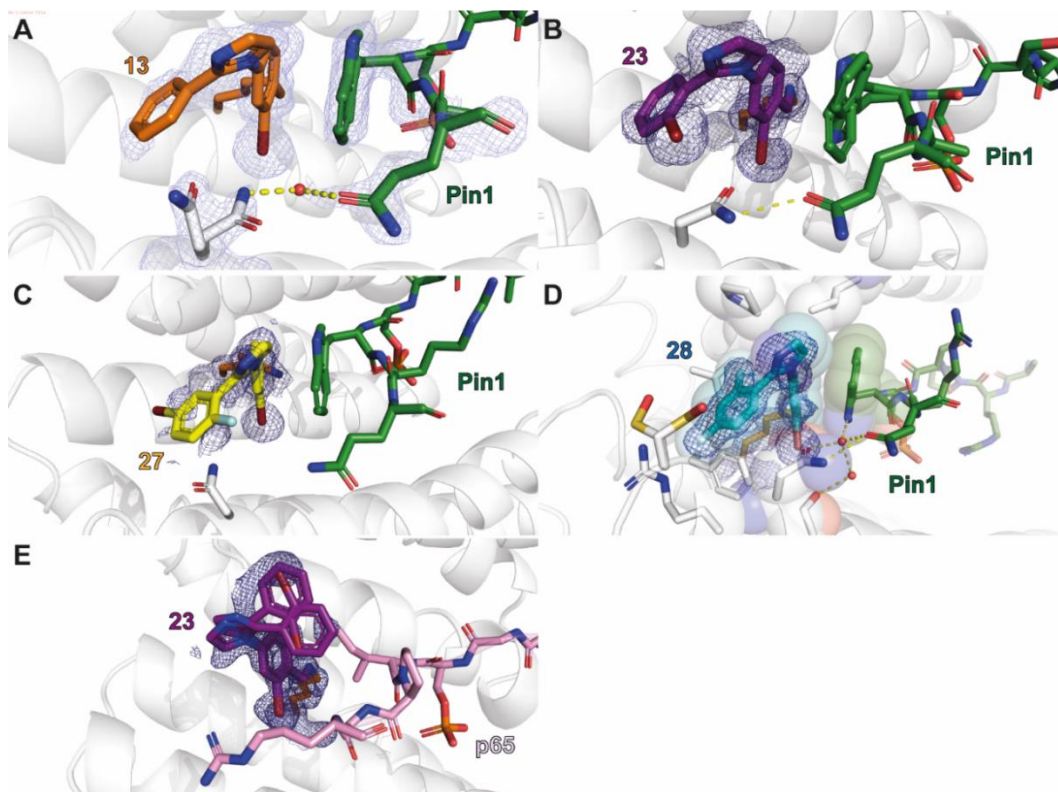

**Figure S6:** Ternary structures of **13**, **23**, **27** and **28** in complex with 14-3-3 $\sigma\Delta C$  and Pin1\_72 or p65. (A) Fragment **13** (orange sticks) with Pin1\_72 (green sticks). (B) Fragment **23** (violet sticks) with Pin1\_72 (green sticks). (C) Fragment **27** (Cyan sticks) with Pin1\_72 (green sticks). (D) Fragment **28** (yellow sticks) with Pin1\_72 (green sticks). 14-3-3 $\sigma\Delta C$  is shown as white cartoon and sticks; the Pin1\_72 is displayed as green cartoon. (E) Fragment **23** (violet sticks) with p65 (rosa sticks). The 2Fo-Fc electron density map (blue mesh) is contoured at  $1\sigma$ .

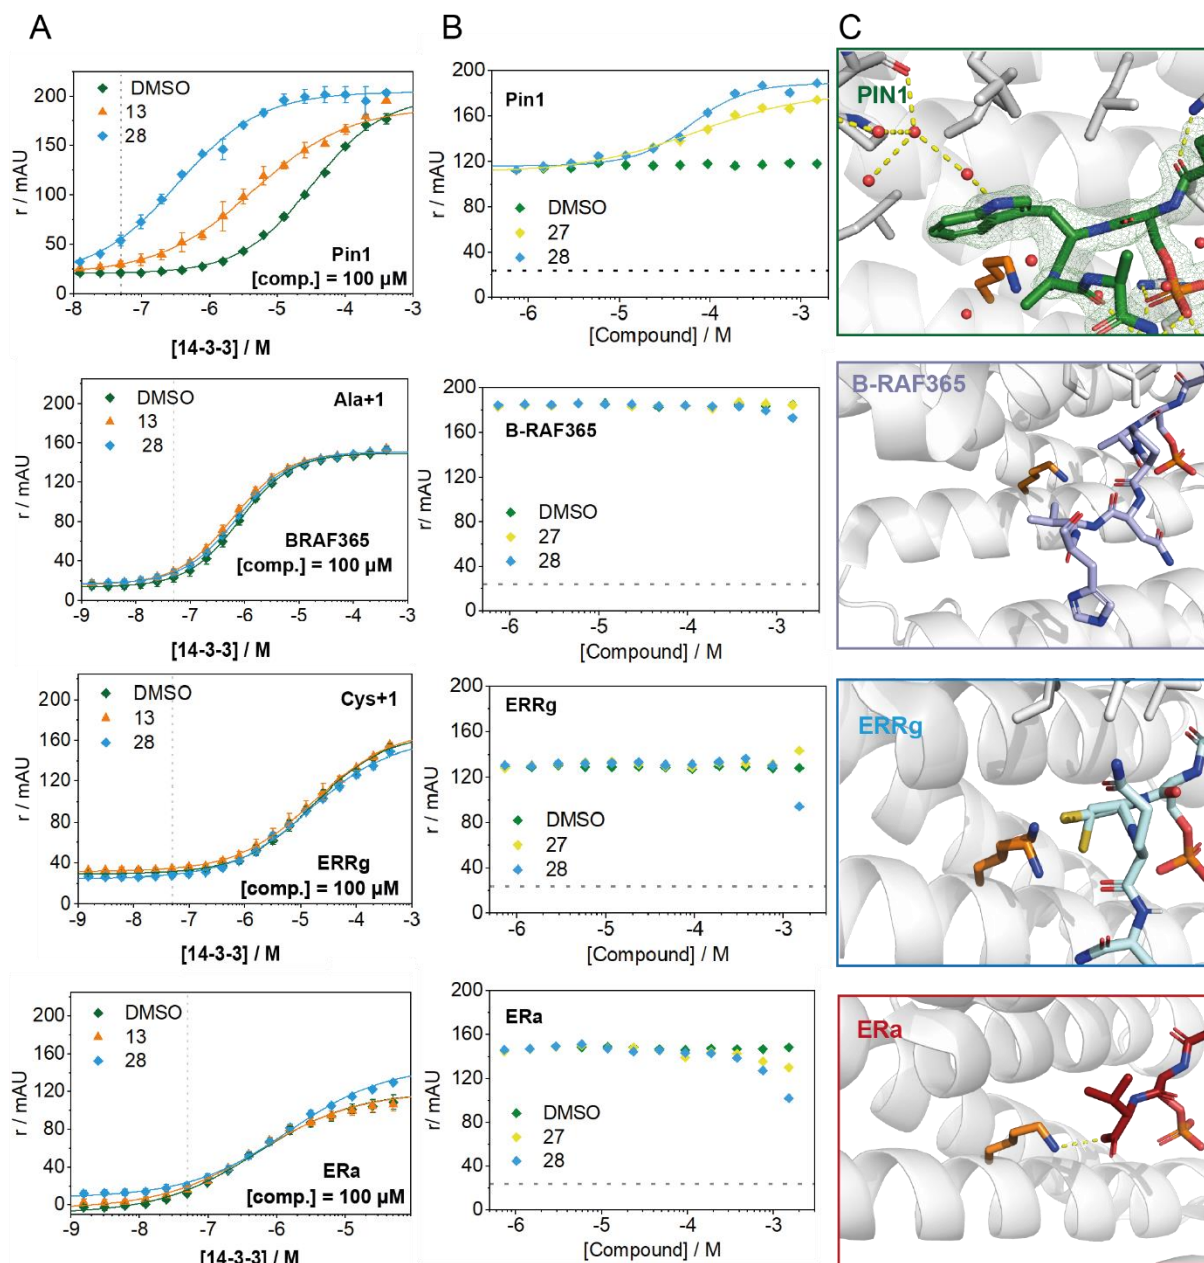

**Figure S7: Competition assay.** (A) Protein titration of 14-3-3 with 50 nM of Pin1, BRAf pS365, ERR $\gamma$  or ER  $\alpha$  and 100  $\mu$ M of **13** or **28**. (B) Compound Titration after overnight incubation of 14-3-3 $\gamma$  and **27** or **28**, followed by addition of 100 nM of Pin1, BRAf pS365, ERR $\gamma$  or ER  $\alpha$ . The grey dotted line indicates the anisotropy of 100% free peptide. (C) Enlarged view of the interface of the binary 14-3-3/partner peptide complex for Pin1, BRAf pS365, ERR $\gamma$  or ER  $\alpha$ .

**Table S4: Data collection and refinement statistics for the 13 and 23 in complex with p65\_45 and 14-3-3 $\sigma$  $\Delta$ C.** Data collection statistics, as reported by aimless, the refinement statistics were derived from the 'Table1' software of the phenix suite. Values in parenthesis represent the highest resolution shell.

| Compound number                   | 13                     | 23                     |
|-----------------------------------|------------------------|------------------------|
| PDB code                          | 7NQP                   | 7NSV                   |
| X-ray source                      | DESY, Petra III, P11   | DESY, Petra III, P11   |
| <b>Data Collection</b>            |                        |                        |
| Wavelength                        | 1.0332                 | 1.0332                 |
| Resolution range                  | 66.38-1.24 (1.27-1.24) | 66.35-1.33 (1.36-1.33) |
| Space group                       | C2221                  | C2221                  |
| Unit cell                         |                        |                        |
| a, b, c (Å)                       | 82.396 112.035 62.607  | 82.91 112.16 62.64     |
| $\alpha$ , $\beta$ , $\gamma$ (°) | 90 90 90               | 90 90 90               |
| Unique reflections                | 81921 (5898)           | 66729 (4896)           |
| Multiplicity                      | 12.0 (8.1)             | 9.2 (9.1)              |
| Completeness (%)                  | 99.8 (97.8)            | 100 (100)              |
| Mean I/sigma(I)                   | 11.1 (1.0)             | 9.9 (1.1)              |
| R-merge                           | 0.102 (1.734)          | 0.103 (1.369)          |
| R-meas                            | 0.106 (1.851)          | 0.109 (1.452)          |
| R-pim                             | 0.030 (0.630)          | 0.036 (0.479)          |
| CC1/2                             | 0.998 (0.636)          | 0.998 (0.722)          |
|                                   |                        |                        |
| <b>Refinement</b>                 |                        |                        |
| Reflections used in refinement    | 81852 (7959)           | 66692 (6591)           |
| Reflections used for R-free       | 4082 (403)             | 3339 (309)             |
| R-work                            | 0.1946 (0.3485)        | 0.2020 (0.3558)        |
| R-free                            | 0.2161 (0.3573)        | 0.2130 (0.3742)        |
| Number of non-hydrogen atoms      | 2209                   | 2164                   |
| macromolecules                    | 1913                   | 1887                   |
| ligands                           | 20                     | 46                     |
| solvent                           | 276                    | 231                    |
| RMS(bonds)                        | 0.01                   | 0.007                  |
| RMS(angles)                       | 1.13                   | 0.92                   |
| Ramachandran favored (%)          | 98.66                  | 98.17                  |
| Ramachandran allowed (%)          | 1.34                   | 1.83                   |
| Ramachandran outliers (%)         | 0                      | 0                      |
| Rotamer outliers (%)              | 0.51                   | 0                      |
| Clashscore                        | 4.2                    | 4.99                   |
| Average B-factor                  | 20.27                  | 20.12                  |
| macromolecules                    | 18.32                  | 18.33                  |
| ligands                           | 33.3                   | 51.15                  |
| solvent                           | 32.79                  | 28.57                  |

## Experimental Section – Biophysical Assays

### Protein Expression and Purification

The 14-3-3 proteins were recombinantly expressed in BL21(DE3) cells using pPROEX HTb vectors encoding for the 14-3-3 $\sigma\Delta$ C ( $\Delta$ C17 truncated C-terminus) and 14-3-3 $\gamma$  isoforms and TB medium. At a culture density of OD<sub>600</sub>=0.8-1, protein expression was initiated with 0.4mM IPTG for 18h at 18°C. The cells were isolated by centrifugation (10.000 xg, 15 min) and resuspended in lysis buffer (50 mM Tris/HCl pH8, 300 mM NaCl, 12.5 mM imidazole, 2 mM  $\beta$ -mercaptoethanol). A homogenizer was utilized for cell lysis, followed by centrifugation (40.000 xg, 30min) to clear the lysate. The proteins were purified using standard protocols for Ni-NTA-columns. The proteins were eluted with 250 mM imidazole (50 mM Tris/HCl pH8, 300 mM NaCl, 250 mM imidazole, 2 mM  $\beta$ -mercaptoethanol) and the full length 14-3-3 $\gamma$  was dialysis against 25mM HEPES pH7.5, 100mM NaCl, 10mM MgCl<sub>2</sub>, 0.5mM Tris(2-carboxyethyl)phosphine) and stored at -80°C. The 14-3-3 $\sigma\Delta$ C for crystallography required removal of the His6-tag by TEV protease; the TEV was removed with Ni-NTA-columns. To ensure highest purity, the 14-3-3 $\sigma\Delta$ C was applied to a size exclusion chromatography (20 mM HEPES pH7.5, 150 mM NaCl, 2 mM  $\beta$ -mercaptoethanol) and stored at -80°C.

### X-Ray Crystallography

All binary crystals prepared by mixing 12 mg/ml 14-3-3 $\sigma\Delta$ C in a 1:2 ratio with acetylated peptide in 20 mM HEPES pH7.5, 2 mM MgCl<sub>2</sub>, 2 mM  $\beta$ -mercaptoethanol, followed by overnight incubation. Pin1<sub>72</sub>/14-3-3 $\sigma\Delta$ C crystals were grown in a hanging drop set up, whereby the complexation solution was mixed in 1:1 ratio with precipitation buffer (95 mM HEPES pH7.1, 27-28% PEG400, 190 mM CaCl<sub>2</sub>, 5% glycerol). B-Raf/14-3-3 $\sigma\Delta$ C and Abl1/14-3-3 $\sigma\Delta$ C crystals were grown in a sitting drop set up. The complexation solution was mixed in 1:1 ratio with precipitation buffer (95 mM HEPES pH7.5, 27-28% PEG400, 190 mM CaCl<sub>2</sub>, 5% glycerol). For AS160/14-3-3 $\sigma\Delta$ C crystals the complexation solution was mixed in a 1:1 ration with the Wizard Cryo™ crystallization screen (Rigaku, Bainbridge Island, US), resulting in crystal growth with 40% (v/v) MPD and 100 mM CHES/ Sodium hydroxide pH 9.5. All crystals were directly flash-frozen in liquid nitrogen and data acquisition took place at either the P11 beamline of PetraIII (DESY campus, Hamburg, Germany) or i-03/i-24 beamline of the diamond light source (Oxford, UK) or in-house.

Fragment screening was performed by crystal soaking, whereby a final concentration of 10 mM fragment was added to fully grown crystals (final DMSO  $\leq$ 1%). The fragment/crystal mixtures incubated for seven days prior to data acquisition at the diamond light source (beamline i03, Oxford, UK), DESY (P11, Hamburg, Germany) or a homesource as indicated. The diffraction data were analyzed with the xia2/DIALS pipeline<sup>1</sup> and MolRep<sup>2,3</sup> was used for phasing. For solving the Pin1/14-3-3 and AS160/14-3-3 structures the PDB entry 4JDD served as search model. The search model for fragment soaks was the correlating binary structure (Pin1/14-3-3: 7AOG, p65/14-3-3: 6QHL). For model refinement Coot<sup>4</sup>, Refmac<sup>5</sup> and phenix.refine<sup>6</sup> were utilized in iterative cycles. The elbow software of the phenix suite<sup>6</sup> was used for ligand preparation based on fragment SMILES. Figures were generated with PyMOL© (V2.0.6, Schrodinger LLC).

### Fluorescence Anisotropy (FA) Assays

Dissociation constants of binary complex formation were measured with a 1:1 dilution series of 14-3-3 $\gamma$  in the presence of 50 nM fluorescently labeled peptide (Table S5). Stabilization factors (SF) were measured by a 1:1 dilution series of 14-3-3 $\gamma$  in the presence of 50 nM fluorescently labeled peptide and 100  $\mu$ M compound (or as indicated) or DMSO as control, with SF = K<sub>D,DMSO</sub>/K<sub>D,compound</sub>. For compound titrations, constant 10  $\mu$ M of 14-3-3 $\gamma$  and 50 nM



of fluorescently labeled Pin1\_72 peptide was used, whereby the compound was titrated in a 1:1 dilution series. All FA assays were measured in FA buffer (10 mM HEPES pH 7.4, 150 mM NaCl, 0.1% Tween20, 1% BSA) in Corning 384 well plates (black, round bottom, low binding). Plates were incubated overnight prior to anisotropy measurements with the Tecan Infinite 500 plate reader ( $\lambda_{\text{excitation}} = 485 \text{ nm}$ ,  $\lambda_{\text{emission}} = 535 \text{ nm}$ ).

**Table S5: Overview of utilized peptide epitopes.** Given are the names as mentioned in the main text, the binding site, the N-terminal modifications with either a fluorophore-linker construct or an acetylation (ace.) for crystallography, the binding sequence and the reference.

| Name         | Binding Site | N-term. modification | Binding Epitope                         | Reference/Purchased    |
|--------------|--------------|----------------------|-----------------------------------------|------------------------|
| Pin1_71      | pS71         | FITC-Ahx             | LVKHSQSRRP pS SWRQEK                    | Genscript              |
| Pin1_72      | pS72         | FITC-Ahx/<br>ace.    | LVKHSQSRRPS pS WRQEK                    | Genscript              |
| p65          | pS45pS281    | FITC- $\beta$ Ala    | EGRSAG pS IPGRRSGSGGGSGPSDREL pS EPMEFQ | 7                      |
| p65_45       | pS45         | ace.                 | EGRSAG pS IPGRRS                        | 7                      |
| B-Raf        | pS729        | FITC-Ahx             | IHRSA pS EPSLN                          | Genscript              |
| B-Raf        | pS365        | FITC-Ahx             | RDRSS pS APNVH                          | Genscript              |
| C-Raf        | pT259        | FITC- $\beta$ Ala    | SQRQRST pS TPNVH                        | 8                      |
| AS160        | pT642        | FITC-Ahx/<br>ace.    | RRRAH pT FSHPP                          | Genscript              |
| Abl1         | pT735        | FITC-Ahx             | EWRSV pT LPRDL                          | Genscript              |
| CFTR         | pS753pS568   | FITC- $\beta$ Ala    | AILPRI pS VISTGPTLQARRRQ pS VLNLMT      | 9                      |
| Raptor       | pS792        | FITC-Ahx             | MRRAS pS YSSLN                          | Genscript              |
| ER $\alpha$  | pT594        | FITC-O1Pen           | AEGFPA pT V-COOH                        | 8                      |
| Mypt1        | pS472        | FITC- $\beta$ Ala    | GVTRSA pS SPRLSS                        | 'Synthesized in-house' |
| ERR $\gamma$ | pS179        | FITC-Ahx             | KRRRK pS CQA                            | 10                     |
| TBC1D        | pS237        | FITC-Ahx             | MRKSF pS QPGLR                          | Genscript              |

### Excitation/Emission Scans

Excitation/Emission profiles of fragments were measured at a final concentration of 1 mM in PBS buffer (137 mM NaCl, 2.7 mM KCl, 10 mM Na<sub>2</sub>HPO<sub>4</sub>, 1.8 mM KH<sub>2</sub>PO<sub>4</sub>). Measurements were performed with a Tecan Safire 2 plate reader ( $\lambda_{\text{excitation}} = 230\text{-}730 \text{ nm}$ ;  $\lambda_{\text{emission}} = 280\text{-}830 \text{ nm}$ ; step size: 25 nm; gain: 60; lagtime: 0  $\mu$ s) in a Corning 384-well plate (black, round bottom, low volume, low binding).

## Experimental Section – Chemistry

### General materials

All reactions were prepared using AR or HPLC grade solvents without further purification. All reagents were purchased from Fluorochem, ABCR, Ak Scientific or Sigma-Aldrich and were used without further purification unless stated. Microwave reactions were performed using a Biotage Initiator Plus equipped with a handling robot. Solvents were removed in vacuo using a Büchi rotary evaporator and a diaphragm pump. DMF and CH<sub>2</sub>Cl<sub>2</sub> were dried and purified by means of a MBRAUN Solvent Purification System (MB-SPS-800). All other solvents used were of chromatography or analytical grade and supplied by Biosolve or Sigma-Aldrich. TLC was carried out on aluminum-backed silica (Merck silica gel 60 F254) plates supplied by Merck. Visualization of the plates was achieved using an ultraviolet lamp ( $\lambda_{\text{max}} = 254 \text{ nm}$ ), 2,4-DNP, KMnO<sub>4</sub>, anisaldehyde, bromine or ninhydrin. Column chromatography was either

performed manually using silica gel (60–63  $\mu\text{m}$  particle size), automated Grace Reveleris X2 or Biotage Isolera chromatograph with prepacked silica columns supplied by Buchi/Grace (40  $\mu\text{m}$  particle size). LC–MS analysis was carried out with a system comprising a Phenomenex kinetex® 2.6  $\mu\text{m}$  EVO C18 50 x 2.1 mm column using ultrapure water with 0.1% formic acid (FA) and acetonitrile with 0.1% FA, in general with using a gradient of 5–100% MeCN in water (+ 0.1% HCOOH) over 10 min, connected to a Thermo Fisher LCQ Fleet Ion Trap Mass Spectrometer. The purity of the samples was assessed using a PDA and MS. Unless otherwise stated all final compounds were  $\geq 95\%$  pure as judged by HPLC. GCMS analysis was performed on a Phenomenex Zebron ZB-5MS 30 m x 0.25 mm x 0.25 mm column with a gradient of 80 °C for 1 min to 300 °C for 1 min with a rate of 30 °C/min in helium gas connected to a GCMS-QP2010 Plus Quadrupole Mass Spectrometer. High resolution mass spectra (HRMS) were recorded using a Waters ACQUITY UPLC I-Class LC system coupled to a Xevo G2 Quadrupole Time of Flight (Q-tof) mass spectrometer equipped with a Phenomenex kinetex® 2.6  $\mu\text{m}$  EVO C18 100 x 2.1 mm column. Proton ( $^1\text{H}$ ) and carbon ( $^{13}\text{C}$ ) NMR spectral data were collected on a 400 MHz Bruker Cryomagnet or 400 MHz Varian Gemini. Chemical shifts ( $\delta$ ) are quoted in parts per million (ppm) and referenced to the residual solvent peak. Coupling constants ( $J$ ) are quoted in Hertz (Hz) and splitting patterns reported in an abbreviated manner: app. (apparent), s (singlet), d (doublet), t (triplet), q (quartet), and m (multiplet). Assignments were made with the aid of 2D COSY, HMQC, and HMBC experiments.

## Synthetic Procedures and Characterization

### General Procedure 1

To a microwave reaction tube was added 4-fluorobenzaldehyde derivative (1 eq), imidazole derivative (1.1 eq) and potassium carbonate (1.5 eq) in 2 mL of DMF. The reaction mixture was subject to microwave irradiation at 120 °C for 15 min. To the resulting reaction mixture was added water (50 mL) and was extracted with ethyl acetate (2 x 50 mL). The organic layers were combined, washed with water (3 x 100 mL) and brine (100 mL). The organic layer was then separated, dried over sodium sulphate and concentrated under vacuum. The resulting crude residue was then subject silica column chromatography (gradient; hexane/EtOAc) to afford the titled compound.

### General Procedure 2

To a microwave reaction tube was added 4-fluorobenzaldehyde derivative (1 eq), imidazole derivative (1.1 eq) and potassium carbonate (1.5 eq) in 2 mL of DMF. The reaction mixture was subject to microwave irradiation at 120 °C for 15 min. To the resulting reaction mixture was added water (10 mL) and the reaction mixture was subject to 2 min of ultra-sonication. The resulting precipitate was then filtered under vacuum, washed with water (2x 3 mL) and dried under vacuum to afford the titled compound

## Compound Characterization

### 3-bromo-4-(1H-imidazol-1-yl)benzaldehyde (1)

Fragment **1** was synthesized according to general synthesis procedure 2 using 3-bromo-4-fluorobenzaldehyde (203 mg, 1.00 mmol),  $\text{K}_2\text{CO}_3$  (207 mg, 1.50 mmol) and imidazole (75 mg, 1.10 mmol) to afford an amorphous cream solid (120 mg, 48%); LRMS (ESI+) 250  $m/z$  (M+H); HRMS (ESI) calcd for  $\text{C}_{10}\text{H}_8\text{BrN}_2\text{O}$  (M+H), 250.9815; found 250.9810;  $^1\text{H}$  NMR (400 MHz, DMSO- $d_6$ )  $\delta$  10.1 (s, 1H), 8.4 (d,  $J = 1.7$  Hz, 1H), 8.0 (dd,  $J = 8.1, 1.8$  Hz, 1H), 8.0 (s, 1H), 7.7 (d,  $J = 8.0$  Hz, 1H), 7.5 (s, 0H), 7.1 (s, 1H);  $^{13}\text{C}$  NMR (101 MHz, DMSO)  $\delta$  191.8, 141.3, 138.1, 137.5, 135.2, 129.7, 129.6, 129.5, 121.3, 120.0.

### **2-chloro-4-(1H-imidazol-1-yl)benzaldehyde (2)**

Fragment **2** was synthesized according to general synthesis procedure 1 using 2-chloro-4-fluorobenzaldehyde (159 mg, 1.00 mmol), K<sub>2</sub>CO<sub>3</sub> (207 mg, 1.50 mmol) and imidazole (75 mg, 1.10 mmol) to afford an amorphous cream solid (38 mg, 18%); LRMS (ESI+) 207 *m/z* (M+H); HRMS (ESI) calcd for C<sub>8</sub>H<sub>7</sub>ClN<sub>2</sub>O (M+H), 207.0325; found 207.0323; <sup>1</sup>H NMR (400 MHz, Acetone-d<sub>6</sub>) δ 10.42 (s, 1H), 8.34 (s, 1H), 8.03 (d, *J* = 8.5 Hz, 1H), 7.94 (d, *J* = 2.1 Hz, 1H), 7.89 – 7.76 (m, 2H), 7.17 (s, 1H); <sup>13</sup>C NMR (100 MHz, Acetone) δ 188.7, 143.2, 139.4, 136.6, 132.0, 131.9, 131.4, 122.5, 119.9, 118.4.

### **2-bromo-4-(1H-imidazol-1-yl)benzaldehyde (3)**

Fragment **3** was synthesized according to general synthesis procedure 2 using 2-bromo-4-fluorobenzaldehyde (100 mg, 0.49 mmol), K<sub>2</sub>CO<sub>3</sub> (74.9 mg, 0.54 mmol) and imidazole (36.9 mg, 0.54 mmol) to afford an amorphous cream solid (91 mg, 74%); LRMS (ESI+) 250 *m/z* (M+H); HRMS (ESI) calcd for C<sub>10</sub>H<sub>8</sub>BrN<sub>2</sub>O (M+H), 250.9815; found 250.9813; <sup>1</sup>H NMR (400 MHz, Acetone) δ 8.34 (s, 1H), 8.11 (d, *J* = 2.2 Hz, 1H), 8.01 (d, *J* = 8.5 Hz, 1H), 7.88 (dd, *J* = 8.5, 2.1 Hz, 1H), 7.81 (s, 1H), 7.17 (s, 1H), 2.05 (p, *J* = 2.2 Hz, 3H); <sup>13</sup>C NMR (101 MHz, Acetone) δ 190.7, 143.2, 136.6, 132.5, 132.2, 132.0, 128.2, 125.7, 120.5, 118.4.

### **4-(4-methyl-1H-imidazol-1-yl)benzaldehyde (4)**

Fragment **4** was synthesized according to general synthesis procedure 1 using 4-fluorobenzaldehyde (200 mg, 1.61 mmol), K<sub>2</sub>CO<sub>3</sub> (245 mg, 1.77 mmol) and 4-methylimidazole (146 mg, 1.77 mmol). The reaction mixture was diluted with water (50 mL) and was extracted with ethylacetate (2x50 mL). The resulting mixture was washed with sodium chloride solution (100 mL). The material was absorbed to silica and subject to automated column chromatography (0 – 100% Hexane:EtOAc) to afford the titled compound as cream solid (70 mg, 21.3%); LRMS (ESI+) *m/z* 187 (M+H); HRMS (ESI) calcd for C<sub>11</sub>H<sub>11</sub>N<sub>2</sub>O (M+H), 187.0871; found 187.0869; <sup>1</sup>H NMR (400 MHz, Acetone) δ 10.05 (s, 1H), 8.15 (s, 1H), 8.05 (d, *J* = 8.7 Hz, 2H), 7.82 (d, *J* = 8.6 Hz, 2H), 7.44 (s, 1H), 2.21 (s, 3H). <sup>13</sup>C NMR (101 MHz, Acetone) δ 191.7, 142.7, 140.9, 135.6, 135.5, 132.2(2C), 120.9 (2C), 114.6, 13.9

NB: structural isomer [4-(3-methyl-1H-imidazol-1-yl)benzaldehyde] observed as a 7.4% impurity (based on proton NMR).

### **4-(4-(trifluoromethyl)-1H-imidazol-1-yl)benzaldehyde (6)**

Fragment **6** was synthesized according to general synthesis procedure 1 using 4-fluorobenzaldehyde (200 mg, 1.61 mmol), K<sub>2</sub>CO<sub>3</sub> (245 mg, 1.17 mmol) and 4-(trifluoromethyl)-1H-imidazol (241 mg, 1.17 mmol) to afford an amorphous cream solid (109 mg, 39%); LRMS (ESI+) 241 *m/z* (M+H); HRMS (ESI) calcd for C<sub>11</sub>H<sub>8</sub>F<sub>3</sub>N<sub>2</sub>O (M+H), 241.0586; found 241.0589; <sup>1</sup>H NMR (400 MHz, Acetone-d<sub>6</sub>) δ 10.11 (s, 1H), 8.42 (s, 1H), 8.31 (s, 1H), 8.13 (d, *J* = 8.6 Hz, 2H), 7.98 (d, *J* = 8.6 Hz, 2H); <sup>13</sup>C NMR (101 MHz, Acetone) δ 191.8, 141.6, 138.1, 136.8, 134.1, (q, *J* = 38.5 Hz), 132.1 (2C), 122.8, (q, *J* = 266.3), 122.5 (2C), 119.5 (q, *J* = 4.0 Hz).

### **4-(1H-benzo[d]imidazol-1-yl)benzaldehyde (7)**

Fragment **7** was synthesized according to general synthesis procedure 2 using using 4-fluorobenzaldehyde (100 mg, 0.81 mmol), K<sub>2</sub>CO<sub>3</sub> (123 mg, 0.89 mmol) and benzimidazole (105 mg, 0.89 mmol) to afford the titled compound as a brown solid (45 mg, 25%); LRMS (ESI+) *m/z* 223 (M+H); HRMS (ESI) calcd for C<sub>14</sub>H<sub>11</sub>N<sub>2</sub>O (M+H), 223.0871; found 223.0860; <sup>1</sup>H NMR (400 MHz, Chloroform-d) δ 10.11 (s, 1H), 8.19 (s, 1H), 8.12 (d, *J* = 8.5 Hz, 2H), 7.90 (dt, *J* = 7.1, 3.6 Hz, 1H), 7.74 (d, *J* = 8.4 Hz, 2H), 7.62 (dt, *J* = 6.7, 3.5 Hz, 1H), 7.43 – 7.34

(m, 2H);  $^{13}\text{C}$  NMR (100 MHz,  $\text{CDCl}_3$ )  $\delta$  190.8, 144.5, 141.9, 141.5, 135.4, 133.1(2C), 131.8, 124.4, 123.9(2C), 123.6, 121.2, 110.6.

#### **1-(4-formylphenyl)-1H-imidazole-2-carboxylic acid (8)**

Fragment **2** was synthesized according to general synthesis procedure 2 using 2-chloro-4-fluorobenzaldehyde (124 mg, 1.00 mmol),  $\text{K}_2\text{CO}_3$  (207 mg, 1.50 mmol) and imidazole (123 mg, 1.10 mmol) to afford the titled compound as an off-white amorphous solid (18 mg, 8 %); LRMS (ESI+) 217  $m/z$  (M+H); HRMS (ESI) calcd for  $\text{C}_{11}\text{H}_8\text{N}_2\text{O}_3$  (M+H), 217.0608; found 217.0612;  $^1\text{H}$  NMR (400 MHz, Acetone- $d_6$ )  $\delta$  10.08 (s, 1H), 8.27 (s, 1H), 8.09 (d,  $J = 8.4$  Hz, 2H), 7.89 (d,  $J = 8.4$  Hz, 2H), 7.17 (s, 1H);  $^{13}\text{C}$  NMR (100 MHz, Acetone)  $\delta$  192.7, 143.6, 137.4, 136.8, 133.1 (2C), 132.7, 122.4 (2C), 119.3.

#### **4-(2-phenyl-1H-imidazol-1-yl)benzaldehyde (9)**

Fragment **9** was synthesized according to general synthesis procedure 2 using 4-fluorobenzaldehyde (100 mg, 0.81 mmol),  $\text{K}_2\text{CO}_3$  (122.5 mg, 0.89 mmol) and 2-phenylimidazole (127.8 mg, 0.89 mmol) to afford the titled compound as an amorphous yellow oil (0.8 mg, 0.4%); LRMS (ESI+)  $m/z$  249 (M+H); HRMS (ESI) calcd for  $\text{C}_{16}\text{H}_{13}\text{N}_2\text{O}$  (M+H), 248.1028; found 249.1024;  $^1\text{H}$  NMR (400 MHz, DMSO- $d_6$ )  $\delta$  10.04 (s, 1H), 7.98 (d,  $J = 8.4$  Hz, 2H), 7.61 (d,  $J = 1.3$  Hz, 1H), 7.58 – 7.46 (m, 2H), 7.46 – 7.27 (m, 5H), 7.24 (d,  $J = 1.3$  Hz, 1H).  $^{13}\text{C}$  NMR (101 MHz, DMSO)  $\delta$  192.7, 146.3, 143.2, 135.7, 131.2 (2C), 130.6, 129.7, 129.0, 128.90 (2C), 128.85 (2C), 126.9 (2C), 123.9.

#### **2-chloro-4-(2-phenyl-1H-imidazol-1-yl)benzaldehyde (10)**

Fragment **10** was synthesized according to general synthesis procedure 2 using 3-chloro-4-fluorobenzaldehyde (100 mg, 0.81 mmol),  $\text{K}_2\text{CO}_3$  (116 mg, 0.84 mmol) and 2-phenylimidazole (90.1 mg, 0.63 mmol) to afford the titled compound as a brown solid (45 mg, 20%); LRMS (ESI+)  $m/z$  283 (M+H); HRMS (ESI) calcd for  $\text{C}_{16}\text{H}_{12}\text{ClN}_2\text{O}$  (M+H), 283.0638; found 283.0639;  $^1\text{H}$  NMR (400 MHz, Acetone)  $\delta$  10.41 (s, 1H), 7.92 (d,  $J = 8.3$  Hz, 1H), 7.57 (d,  $J = 2.0$  Hz, 1H), 7.51 (d,  $J = 1.4$  Hz, 1H), 7.42 (dd,  $J = 7.5, 2.1$  Hz, 2H), 7.39 (d,  $J = 2.0$  Hz, 1H), 7.38 – 7.29 (m, 3H), 7.21 (d,  $J = 1.4$  Hz, 1H).  $^{13}\text{C}$  NMR (101 MHz, Acetone)  $\delta$  189.0, 147.3, 144.8, 138.5, 132.5, 131.4, 131.2, 130.5, 129.7(2C), 129.5, 129.2(2C), 128.4, 126.0, 123.6.

#### **3-chloro-4-(2-phenyl-1H-imidazol-1-yl)benzaldehyde (11)**

Fragment **11** was synthesized according to general synthesis procedure 2 using 3-chloro-4-fluorobenzaldehyde (159 mg, 1.00 mmol),  $\text{K}_2\text{CO}_3$  (207 mg, 1.50 mmol) and 2-phenylimidazole (159 mg, 1.10 mmol) to afford an amorphous cream solid (31 mg, 11%); LRMS (ESI+)  $m/z$  283 (M+H); HRMS (ESI) calcd for  $\text{C}_{16}\text{H}_{12}\text{ClN}_2\text{O}$  (M+H), 283.0638; found 283.0647;  $^1\text{H}$  NMR (400 MHz, Acetone- $d_6$ )  $\delta$  10.12 (s, 1H), 8.12 (d,  $J = 1.7$  Hz, 1H), 8.04 (dd,  $J = 8.0, 1.7$  Hz, 1H), 7.77 (d,  $J = 8.1$  Hz, 1H), 7.39 (dd,  $J = 7.4, 2.0$  Hz, 2H), 7.35 (d,  $J = 1.3$  Hz, 1H), 7.31 – 7.21 (m, 4H);  $^{13}\text{C}$  NMR (100 MHz, Acetone)  $\delta$  191.2, 147.8, 142.1, 138.9, 133.4, 132.0, 131.61, 131.59, 130.3, 129.7, 129.3, 129.2 (2C), 128.5 (2C), 123.8.

#### **3-bromo-4-(2-phenyl-1H-imidazol-1-yl)benzaldehyde (12)**

Fragment **12** was synthesized according to general synthesis procedure 2 using 3-bromo-4-fluorobenzaldehyde (100 mg, 0.49 mmol),  $\text{K}_2\text{CO}_3$  (75 mg, 0.54 mmol) and 2-phenylimidazole (78 mg, 0.54 mmol) to afford the titled compound as an amorphous brown oil (9.7 mg, 6%); LRMS (ESI+)  $m/z$  327 (M+H); HRMS (ESI) calcd for  $\text{C}_{16}\text{H}_{12}\text{BrN}_2\text{O}$  (M+H), 327.0133; found 327.0139;  $^1\text{H}$  NMR (400 MHz,  $\text{CDCl}_3$ )  $\delta$  10.44 (s, 1H), 9.35 (d,  $J = 8.6$  Hz, 1H), 8.00 (d,  $J = 7.5$  Hz, 1H), 7.76 (t,  $J = 7.6$  Hz, 1H), 7.70 – 7.57 (m, 1H), 7.49 (d,  $J = 7.5$  Hz, 1H), 7.30 (d,  $J$

= 7.6 Hz, 2H), 7.23 – 7.01 (m, 3H). <sup>13</sup>C NMR (101 MHz, CDCl<sub>3</sub>) δ 192.7, 135.7, 132.0, 131.7, 130.4, 130.1, 128.8, 128.7, 128.5 (2C), 127.9 (2C), 125.5, 124.7, 123.4.

#### **2-bromo-4-(2-phenyl-1H-imidazol-1-yl)benzaldehyde (13)**

Fragment **13** was synthesized according to general synthesis procedure 1 using 2-bromo-4-fluorobenzaldehyde (100 mg, 0.49 mmol), K<sub>2</sub>CO<sub>3</sub> (75 mg, 0.54 mmol) and 2-phenylimidazole (78.1 mg, 0.54 mmol) to afford the titled compound as a brown solid (64 mg, 40%); LRMS (ESI+) *m/z* 327 (M+H); HRMS (ESI) calcd for C<sub>16</sub>H<sub>12</sub>BrN<sub>2</sub>O (M+H), 327.0133; found 327.0130; <sup>1</sup>H NMR (400 MHz, Acetone-*d*<sub>6</sub>) δ 10.32 (s, 1H), 7.92 (d, *J* = 8.3 Hz, 1H), 7.76 (d, 1H), 7.53 (s, 1H), 7.48 – 7.31 (m, 6H), 7.22 (s, 1H). <sup>13</sup>C NMR (100 MHz, CDCl<sub>3</sub>) δ 190.5, 147.1, 143.9, 132.7, 130.9, 130.4, 130.3, 129.7, 129.3, 129.0 (2C), 128.7 (2C), 127.5, 125.2, 122.2.

#### **4-(2-phenyl-1H-imidazol-1-yl)-2-(trifluoromethyl)benzaldehyde (14)**

Fragment **14** was synthesized according to general synthesis procedure 2 using 4-Fluoro-2-(trifluoromethyl)benzaldehyde (100 mg, 0.52 mmol), K<sub>2</sub>CO<sub>3</sub> (79 mg, 0.57 mmol) and 2-phenylimidazole (82.6 mg, 0.57 mmol) to afford the titled compound as a brown solid (75 mg, 46%); LRMS (ESI+) *m/z* 317 (M+H); HRMS (ESI) calcd for C<sub>16</sub>H<sub>12</sub>BrN<sub>2</sub>O (M+H), 317.0902; found 317.0906. <sup>1</sup>H NMR (400 MHz, Acetone) δ 10.36 (d, *J* = 2.3 Hz, 1H), 8.19 (d, *J* = 8.3 Hz, 1H), 7.88 (s, 1H), 7.78 (d, *J* = 8.3 Hz, 1H), 7.63 (s, 1H), 7.51 – 7.31 (m, 6H), 7.27 (s, 1H); <sup>13</sup>C NMR (100 MHz, Acetone-*d*<sub>6</sub>) δ 189.4 (q, *J* = 2.1 Hz), 148.3, 144.6, 134.4 (d, *J* = 1.5 Hz), 133.1, 132.7 (d, *J* = 33.1 Hz), 132.2, 131.6, 130.7 (2C), 130.5, 130.1 (2C), 125.5 (q, *J* = 6.0 Hz), 124.5.

#### **4-(2-phenyl-1H-imidazol-1-yl)-3-(trifluoromethyl)benzaldehyde (15)**

Fragment **15** was synthesized according to general synthesis procedure 2 using 4-Fluoro-3-(trifluoromethyl)benzaldehyde (100 mg, 0.52 mmol), K<sub>2</sub>CO<sub>3</sub> (96 mg, 0.69 mmol) and 2-phenylimidazole (75 mg, 0.52 mmol) to afford the titled compound as a brown solid (9 mg, 5.4%); LRMS (ESI+) *m/z* 317 (M+H); HRMS (ESI) calcd for C<sub>17</sub>H<sub>12</sub>F<sub>3</sub>N<sub>2</sub>O (M+H), 317.0902; found 317.0921; <sup>1</sup>H NMR (400 MHz, DMSO-*d*<sub>6</sub>) δ 10.17 (s, 1H), 8.46 (d, *J* = 1.8 Hz, 1H), 8.28 (dd, *J* = 8.1, 1.8 Hz, 1H), 7.81 (d, *J* = 8.1 Hz, 1H), 7.51 (brs, 1H), 7.29 – 7.24 (m, 6H); <sup>13</sup>C NMR (101 MHz, DMSO-*d*<sub>6</sub>) δ 192.0, 147.2, 140.9 (d, *J* = 1.7 Hz, \*quartet not completely resolved), 137.1, 134.4, 132.9, 130.2, 129.2, 128.9 (2C), 127.9 (2C), 127.2 (q, *J* = 31.2 Hz), 125.4, 122.9 (d, *J* = 274.2 Hz, \*quartet not completely resolved).

#### **2-methoxy-4-(2-phenyl-1H-imidazol-1-yl)benzaldehyde (16)**

Fragment **16** was synthesized according to general synthesis procedure 2 using 2-methoxy-4-fluorobenzaldehyde (100 mg, 0.65 mmol), K<sub>2</sub>CO<sub>3</sub> (89.7 mg, 0.65 mmol) and 2-phenylimidazole (62.4 mg, 0.43 mmol) to afford the titled compound as a brown solid (22.9 mg, 19%); LRMS (ESI+) *m/z* 279 (M+H); HRMS (ESI) calcd for C<sub>17</sub>H<sub>15</sub>N<sub>2</sub>O<sub>2</sub> (M+H), 279.1134; found 279.1133; <sup>1</sup>H NMR (400 MHz, CDCl<sub>3</sub>) δ 10.40 (s, 1H), 7.84 (d, *J* = 8.3 Hz, 1H), 7.39 (dd, *J* = 7.6, 2.0 Hz, 1H), 7.33 – 7.24 (m, 3H), 7.21 (s, 1H), 6.90 (dd, *J* = 8.2, 1.2 Hz, 1H), 6.72 (d, *J* = 1.9 Hz, 1H), 3.70 (s, 2H). <sup>13</sup>C NMR (100 MHz, CDCl<sub>3</sub>) δ 207.1, 188.6, 162.2, 146.9, 144.6, 130.1, 123.0, 129.8, 128.9 (2C), 128.5 (2C), 124.0, 122.2, 117.6, 109.5, 56.0.

#### **3-methoxy-4-(2-phenyl-1H-imidazol-1-yl)benzaldehyde (17)**

Fragment **17** was synthesized according to general synthesis procedure 1 using 3-methoxy-4-fluorobenzaldehyde (100 mg, 0.65 mmol), K<sub>2</sub>CO<sub>3</sub> (99 mg, 0.71 mmol) and 2-phenylimidazole (103 mg, 0.71 mmol) to afford the titled compound as a brown solid (7 mg, 10%); LRMS (ESI+)

$m/z$  279 (M+H); HRMS (ESI) calcd for C<sub>17</sub>H<sub>15</sub>N<sub>2</sub>O<sub>2</sub> (M+H), 279.1134; found 279.1144; <sup>1</sup>H NMR (400 MHz, Acetone)  $\delta$  10.07 (s, 1H), 7.65 (d,  $J$  = 6.6 Hz, 2H), 7.54 (d,  $J$  = 8.2 Hz, 1H), 7.43 – 7.36 (m, 2H), 7.33 – 7.22 (m, 4H), 7.20 (s, 1H), 3.70 (s, 3H). <sup>13</sup>C NMR (100 MHz, Acetone)  $\delta$  192.1, 155.7, 147.9, 138.9, 133.6, 132.1, 129.9, 129.5, 129.1, 128.9 (2C), 128.4 (2C), 124.1, 124.0, 112.8, 56.4.

### **3-methyl-4-(2-phenyl-1H-imidazol-1-yl)benzaldehyde (18)**

Fragment **18** was synthesized according to general synthesis procedure 1 using 4-Fluoro-3-methylbenzaldehyde (100 mg, 0.72 mmol), K<sub>2</sub>CO<sub>3</sub> (133.4 mg, 0.97 mmol) and 2-phenylimidazole (72.4 mg, 0.72 mmol) to afford the titled compound as an amorphous brown oil (12 mg, 6.6%); LRMS (ESI+) 263  $m/z$  (M+H); HRMS (ESI) calcd for C<sub>17</sub>H<sub>15</sub>N<sub>2</sub>O (M+H), 263.1179; found 263.1185; <sup>1</sup>H NMR (400 MHz, Acetone)  $\delta$  10.09 (s, 1H), 7.91 (d,  $J$  = 7.1 Hz, 2H), 7.56 (d,  $J$  = 8.7 Hz, 1H), 7.39 (dd,  $J$  = 7.8, 1.9 Hz, 2H), 7.32 – 7.20 (m, 4H), 2.03 (s, 3H). <sup>13</sup>C NMR (101 MHz, Acetone)  $\delta$  192.3, 143.9, 137.8, 137.2, 133.1, 131.8, 130.3, 129.6, 129.2, 129.1 (2C), 129.0, 128.4(2C), 123.6, 17.5.

### **2-hydroxy-4-(2-phenyl-1H-imidazol-1-yl)benzaldehyde (19)**

Boron tribromide (1 M in DCM, 5 mL) was added dropwise to a solution of 2-methoxy-4-(2-phenyl-1H-imidazol-1-yl)benzaldehyde (**16**, 30 mg, 0.11 mmol) in anhydrous DCM (3 mL). The reaction was stirred at rt overnight after addition under an argon atmosphere. The reaction was quenched using ice water, followed by additional 5 M hydrochloride solution until the pH reached 1. The product was extracted using ethylacetate (2x50 mL). The resulting organic layer was washed with saturated sodium chloride solution (100 mL). The crude residue was absorbed to silica and subject to column chromatography (0-20% EtOAc:methanol) to afford the titled compound as a yellow solid (5 mg, 17%); LRMS (ESI+)  $m/z$  265 (M+H); HRMS (ESI) calcd for C<sub>16</sub>H<sub>13</sub>N<sub>2</sub>O<sub>2</sub> (M+H), 265.0977; found 265.0974; <sup>1</sup>H NMR (400 MHz, Acetone-*d*<sub>6</sub>)  $\delta$  10.09 (s, 1H), 7.92 – 7.75 (m, 1H), 7.56 – 7.40 (m, 3H), 7.39 – 7.26 (m, 3H), 7.20 (d,  $J$  = 1.3 Hz, 1H), 7.05 – 6.81 (m, 2H). <sup>13</sup>C NMR (101 MHz, Acetone)  $\delta$  198.0, 187.1, 136.5, 132.6, 131.3, 130.4, 130.3 (2C), 130.02, 130.01 (2C), 124.5, 122.4, 122.1, 119.2, 115.8.

### **4-(2-phenyl-1H-imidazol-1-yl)-3-(trifluoromethoxy)benzaldehyde (20)**

Fragment **20** was synthesized according to general synthesis procedure 1 using 4-Fluoro-3-(trifluoromethoxy)benzaldehyde (100 mg, 0.48 mmol), K<sub>2</sub>CO<sub>3</sub> (66 mg, 0.48 mmol) and 2-phenylimidazole (46 mg, 0.32 mmol) to afford the titled compound as an amorphous brown oil (64 mg, 60%); LRMS (ESI+)  $m/z$  333 (M+H); HRMS (ESI) calcd for C<sub>17</sub>H<sub>12</sub>F<sub>3</sub>N<sub>2</sub>O<sub>2</sub> (M+H), 333.0851; found 333.0837; <sup>1</sup>H NMR (400 MHz, Acetone-*d*<sub>6</sub>)  $\delta$  10.15 (s, 1H), 8.10 (d,  $J$  = 8.1 Hz, 1H), 8.00 (s, 1H), 7.83 (d,  $J$  = 8.1 Hz, 1H), 7.42 (s, 1H), 7.38 (d,  $J$  = 5.7 Hz, 2H), 7.33 – 7.28 (m, 4H); <sup>13</sup>C NMR (101 MHz, Acetone-*d*<sub>6</sub>)  $\delta$  191.1, 148.1, 144.8 (q,  $J$  = 1.6 Hz), 138.7, 136.8, 131.4, 131.4, 130.4, 129.9, 129.4, 129.1(2C), 128.6(2C), 124.0, 122.4, 121.0 (q,  $J$  = 259.2 Hz).

### **3-phenoxy-4-(2-phenyl-1H-imidazol-1-yl)benzaldehyde (21)**

Fragment **21** was synthesized according to general synthesis procedure 1 using 3-phenoxy-4-fluorobenzaldehyde (100 mg, 0.46 mmol), K<sub>2</sub>CO<sub>3</sub> (64 mg, 0.46 mmol) and 2-phenylimidazole (44.5 mg, 0.31 mmol) to afford the titled compound as an amorphous brown oil (17.5 mg, 17%); LRMS (ESI+)  $m/z$  341 (M+H); HRMS (ESI) calcd for C<sub>22</sub>H<sub>17</sub>N<sub>2</sub>O<sub>2</sub> (M+H), 341.1290; found 341.1291; <sup>1</sup>H NMR (400 MHz, Acetone-*d*<sub>6</sub>)  $\delta$  10.00 (s, 1H), 7.79 (dd,  $J$  = 21.9, 8.0 Hz, 2H), 7.45 (d,  $J$  = 7.4 Hz, 2H), 7.39 (s, 1H), 7.36 – 7.27 (m, 6H), 7.21 – 7.14 (m, 2H), 6.66 (d,  $J$  = 8.0 Hz, 2H); <sup>13</sup>C NMR (101 MHz, Acetone)  $\delta$  191.7, 155.5, 154.1, 148.1, 138.6, 134.8, 132.3, 131.1 (2C), 130.5, 130.0, 129.2, 129.1 (2C), 128.6 (2C), 125.8, 125.7, 124.0, 120.6(2C), 117.8.

#### **4-(2-phenyl-1H-imidazol-1-yl)-1-naphthaldehyde (22)**

Fragment **22** was synthesized according to general synthesis procedure 1 using 4-fluoro-1-naphthaldehyde (100 mg, 0.57 mmol), K<sub>2</sub>CO<sub>3</sub> (87mg, 0.63 mmol) and 2-phenylimidazole (91 mg, 0.63 mmol) to afford the titled compound as a yellow solid (44 mg, 26%); LRMS (ESI+) *m/z* 299 (M+H); HRMS (ESI) calcd for C<sub>20</sub>H<sub>15</sub>N<sub>2</sub>O (M+H), 299.1184; found 299.1183; <sup>1</sup>H NMR (400 MHz, Acetone-*d*<sub>6</sub>) δ 10.52 (s, 1H), 9.35 (d, *J* = 8.6 Hz, 1H), 8.29 (d, *J* = 7.5 Hz, 1H), 7.84 – 7.77 (m, 2H), 7.66 (t, *J* = 7.7 Hz, 1H), 7.52 – 7.44 (m, 2H), 7.38 – 7.31 (m, 3H), 7.23 – 7.09 (m, 3H); <sup>13</sup>C NMR (100 MHz, Acetone) δ 193.9, 148.4, 141.7, 136.8, 133.0, 132.2, 131.4, 131.3, 130.6, 130.1, 129.3, 129.2, 129.0 (2C), 128.4 (2C), 126.0, 125.9, 125.3, 124.0,

#### **2-bromo-4-(2-(2-bromophenyl)-1H-imidazol-1-yl)benzaldehyde (23)**

Fragment **23** was synthesized according to general synthesis procedure 2 using 3-bromo-4-fluorobenzaldehyde (120 mg, 0.6 mmol), K<sub>2</sub>CO<sub>3</sub> (80 mg, 0.6 mmol) and 2-(2-Bromophenyl)-1H-imidazole (90 mg, 0.4 mmol) to afford an amorphous off white solid (94 mg, 58%); LRMS (ESI+) *m/z* 407 (M+H, 100%, Br<sup>79</sup>, Br<sup>81</sup>); HRMS (ESI) calcd for C<sub>16</sub>H<sub>11</sub>Br<sub>2</sub>N<sub>2</sub>O (M+H), 404.9238; found 404.9237; <sup>1</sup>H NMR (400 MHz, Acetone-*d*<sub>6</sub>) δ 10.25 (s, 1H), 7.84 (d, *J* = 8.4 Hz, 1H), 7.67 (s, 1H), 7.65 – 7.59 (m, 5H), 7.52 (t, *J* = 7.5 Hz, 2H), 7.43 (t, *J* = 7.7 Hz, 2H), 7.37 (d, *J* = 8.3 Hz, 2H), 7.26 (s, 1H); <sup>13</sup>C NMR (100 MHz, Acetone) δ 190.8, 146.2, 144.0, 134.0, 133.70, 133.67, 133.1, 132.2, 131.3, 130.5, 130.3, 128.7, 126.9, 124.9, 124.5, 121.9.

#### **2-bromo-4-(2-(4-bromophenyl)-1H-imidazol-1-yl)benzaldehyde (24)**

Fragment **24** was synthesized according to general synthesis procedure 2 using 3-bromo-4-fluorobenzaldehyde (300 mg, 1.5 mmol), K<sub>2</sub>CO<sub>3</sub> (210 mg, 1.5 mmol) and 2-(4-Bromophenyl)-1H-imidazole (220 mg, 1.0 mmol) to afford an amorphous cream solid (19 mg, 5%); LRMS (ESI+) *m/z* 407 (M+H, 100%, Br<sup>79</sup>, Br<sup>81</sup>); HRMS (ESI) calcd for C<sub>16</sub>H<sub>11</sub>Br<sub>2</sub>N<sub>2</sub>O (M+H), 404.9238; found 404.9229; <sup>1</sup>H NMR (400 MHz, Acetone-*d*<sub>6</sub>) δ 10.33 (s, 1H), 7.95 (d, *J* = 8.3 Hz, 1H), 7.82 (d, *J* = 2.0 Hz, 1H), 7.54 (d, *J* = 8.9 Hz, 3H), 7.47 (dd, *J* = 8.4, 2.0 Hz, 1H), 7.38 (d, *J* = 8.5 Hz, 2H), 7.23 (s, 1H); <sup>13</sup>C NMR (100 MHz, Acetone) δ 190.9, 146.2, 144.5, 133.8, 132.4 (2C), 131.63, 131.60, 131.4 (2C), 130.7, 130.5, 127.3, 126.6, 124.1, 123.3.

#### **2-bromo-4-(2-(4-hydroxyphenyl)-1H-imidazol-1-yl)benzaldehyde (25)**

Fragment **25** was synthesized according to general synthesis procedure 1 using 3-bromo-4-fluorobenzaldehyde (300 mg, 1.5 mmol), K<sub>2</sub>CO<sub>3</sub> (210 mg, 1.5 mmol) and 4-(1H-Imidazol-2-yl)phenol (160 mg, 1.0 mmol) to afford an amorphous cream solid (66 mg, 19%); LRMS (ESI+) *m/z* 343 (M+H); HRMS (ESI) calcd for C<sub>16</sub>H<sub>12</sub>BrN<sub>2</sub>O<sub>2</sub> (M+H), 343.0082; found 343.0085; <sup>1</sup>H NMR (400 MHz, Acetone-*d*<sub>6</sub>) δ 11.71 (s, 1H), 10.23 (s, 1H), 8.11 (d, *J* = 8.7 Hz, 2H), 7.92 (d, *J* = 8.7 Hz, 1H), 7.31 (d, *J* = 2.4 Hz, 1H), 7.30 – 7.21 (m, 4H), 7.16 (dd, *J* = 8.7, 2.4 Hz, 1H), 7.09 (s, 1H). <sup>13</sup>C NMR (100 MHz, Acetone) δ 191.3, 164.8, 156.2, 147.1, 133.4, 131.3, 130.55, 130.45, 129.3, 128.8 (2C), 123.6, 122.5 (2C), 119.0, 118.8.

#### **2-bromo-4-(2-(pyridin-3-yl)-1H-imidazol-1-yl)benzaldehyde (26)**

Fragment **26** was synthesized according to general synthesis procedure 2 using 3-bromo-4-fluorobenzaldehyde (300 mg, 1.5 mmol), K<sub>2</sub>CO<sub>3</sub> (210 mg, 1.5 mmol) and 3-(1H-Imidazol-2-yl)pyridine (150 mg, 1.0 mmol) to afford an amorphous cream solid (120 mg, 37%); LRMS (ESI+) *m/z* 328 (M+H); HRMS (ESI) calcd for C<sub>15</sub>H<sub>10</sub>BrN<sub>3</sub>O (M+H), 328.0085; found 328.0077; <sup>1</sup>H NMR (400 MHz, Acetone-*d*<sub>6</sub>) δ 10.33 (s, 1H), 8.63 (d, *J* = 2.2 Hz, 1H), 8.54 (dd, *J* = 4.9, 1.6 Hz, 1H), 7.95 (d, *J* = 8.3 Hz, 1H), 7.85 (d, *J* = 2.0 Hz, 1H), 7.75 (d, *J* = 8.0 Hz, 1H), 7.60 (d, *J* = 1.3 Hz, 1H), 7.51 (dd, *J* = 8.3, 2.0 Hz, 1H), 7.34 (dd, *J* = 8.0, 4.8 Hz, 1H),

7.28 (d,  $J = 1.3$  Hz, 1H).  $^{13}\text{C}$  NMR (100 MHz, Acetone)  $\delta$  190.0, 149.4, 149.3, 143.8, 143.4, 135.6, 133.0, 130.9, 130.8, 130.0, 126.5, 126.5, 125.8, 123.4, 123.1.

### **2-bromo-4-(2-(5-bromo-2-fluorophenyl)-1H-imidazol-1-yl)benzaldehyde (27)**

Fragment **27** was synthesized according to general synthesis procedure 1 using 3-bromo-4-fluorobenzaldehyde (203 mg, 1.0 mmol),  $\text{K}_2\text{CO}_3$  (152 mg, 1.1 mmol) and 2-(2,4-difluorophenyl)-1H-imidazole (176 mg, 1.1 mmol) to afford an amorphous beige solid (80 mg, 19%); LRMS (ESI+)  $m/z$  425 (M+H, 100%.  $\text{Br}^{79}$ ,  $\text{Br}^{81}$ ); HRMS (ESI) calcd for  $\text{C}_{16}\text{H}_{10}\text{Br}_2\text{FN}_2\text{O}$  (M+H), 422.9144; found 422.9134;  $^1\text{H}$  NMR (399 MHz, Acetone- $d_6$ )  $\delta$  10.30 (s, 1H), 7.91 (d,  $J = 8.3$  Hz, 1H), 7.87 (dd,  $J = 6.4, 2.5$  Hz, 1H), 7.79 (s, 1H), 7.68 (d,  $J = 11.6$  Hz, 2H), 7.47 (d,  $J = 8.3$  Hz, 1H), 7.31 (s, 1H), 7.18 – 6.96 (m, 1H).  $^{13}\text{C}$  NMR (100 MHz, Acetone- $d_6$ )  $\delta$  189.9, 159.7, 157.2, 143.3 (d,  $J = 2.2$  Hz), 140.4 (d,  $J = 1.3$  Hz), 134.7 (d,  $J = 3.0$  Hz), 134.4 (d,  $J = 8.5$  Hz), 132.7, 130.5 (d,  $J = 29.6$  Hz), 129.2, 126.3, 124.0, 122.7, 121.1 (d,  $J = 16.2$  Hz), 117.9 (d,  $J = 23.6$  Hz), 116.6 (d,  $J = 3.4$  Hz).

### **2-bromo-4-(2-(2,4-difluorophenyl)-1H-imidazol-1-yl)benzaldehyde (28)**

Fragment **28** was synthesized according to general synthesis procedure 1 using 3-bromo-4-fluorobenzaldehyde (203 mg, 1.0 mmol),  $\text{K}_2\text{CO}_3$  (152 mg, 1.1 mmol) and 2-(2,4-difluorophenyl)-1H-imidazole (198 mg, 1.1 mmol) to afford an amorphous beige solid (62 mg, 17%); LRMS (ESI+)  $m/z$  363 (M+H); HRMS (ESI) calcd for  $\text{C}_{16}\text{H}_{10}\text{BrF}_2\text{N}_2\text{O}$  (M+H), 362.9945; found 362.9946;  $^1\text{H}$  NMR (400 MHz, DMSO- $d_6$ )  $\delta$  10.17 (s, 1H), 7.84 (d,  $J = 8.4$  Hz, 1H), 7.78 (dd,  $J = 16.9, 1.8$  Hz, 2H), 7.68 (td,  $J = 8.2, 6.3$  Hz, 1H), 7.35 (ddd,  $J = 8.3, 2.1, 0.7$  Hz, 1H), 7.30 (d,  $J = 1.4$  Hz, 1H), 7.28 – 7.20 (m, 2H);  $^{13}\text{C}$  NMR (101 MHz, DMSO- $d_6$ )  $\delta$  190.7, 163.0 (dd,  $J = 249.4, 12.3$  Hz), 159.1 (dd,  $J = 250.3, 12.8$  Hz), 142.6 (d,  $J = 1.4$  Hz), 140.3 (d,  $J = 1.0$  Hz), 133.6 (dd,  $J = 10.0, 4.0$  Hz), 132.0, 131.0, 129.8, 129.0, 125.9, 123.9, 122.7, 115.1 (dd,  $J = 14.9, 3.8$  Hz), 112.4 (dd,  $J = 21.7, 3.5$  Hz), 104.5 (t,  $J = 26.0$  Hz).



# NMR Spectra Fragment 1

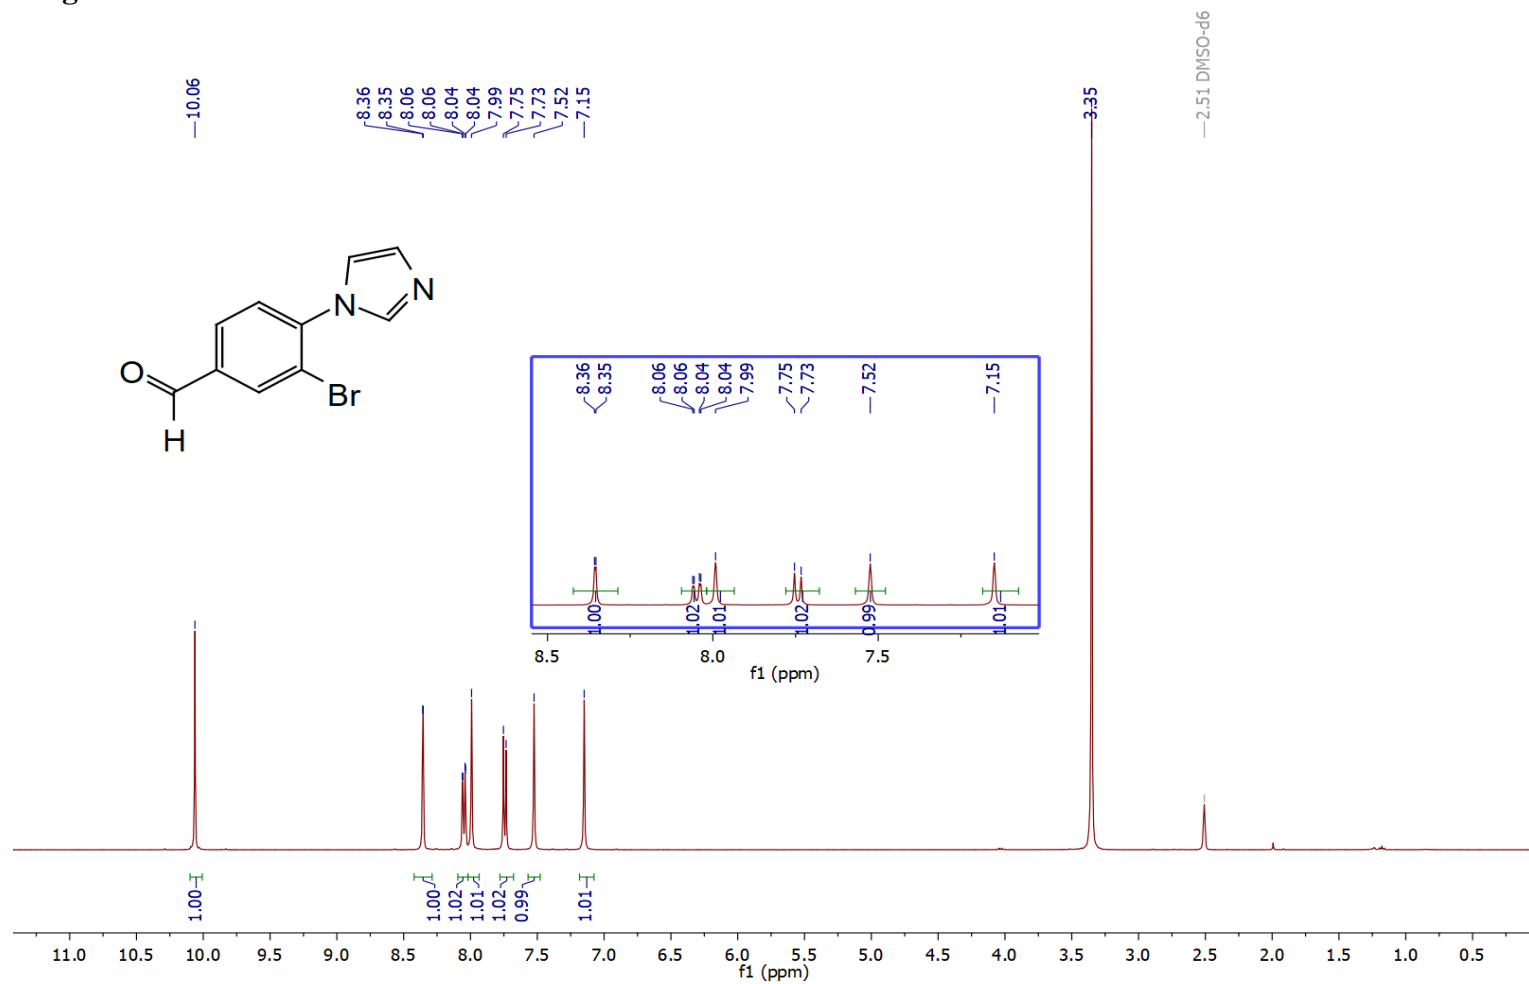

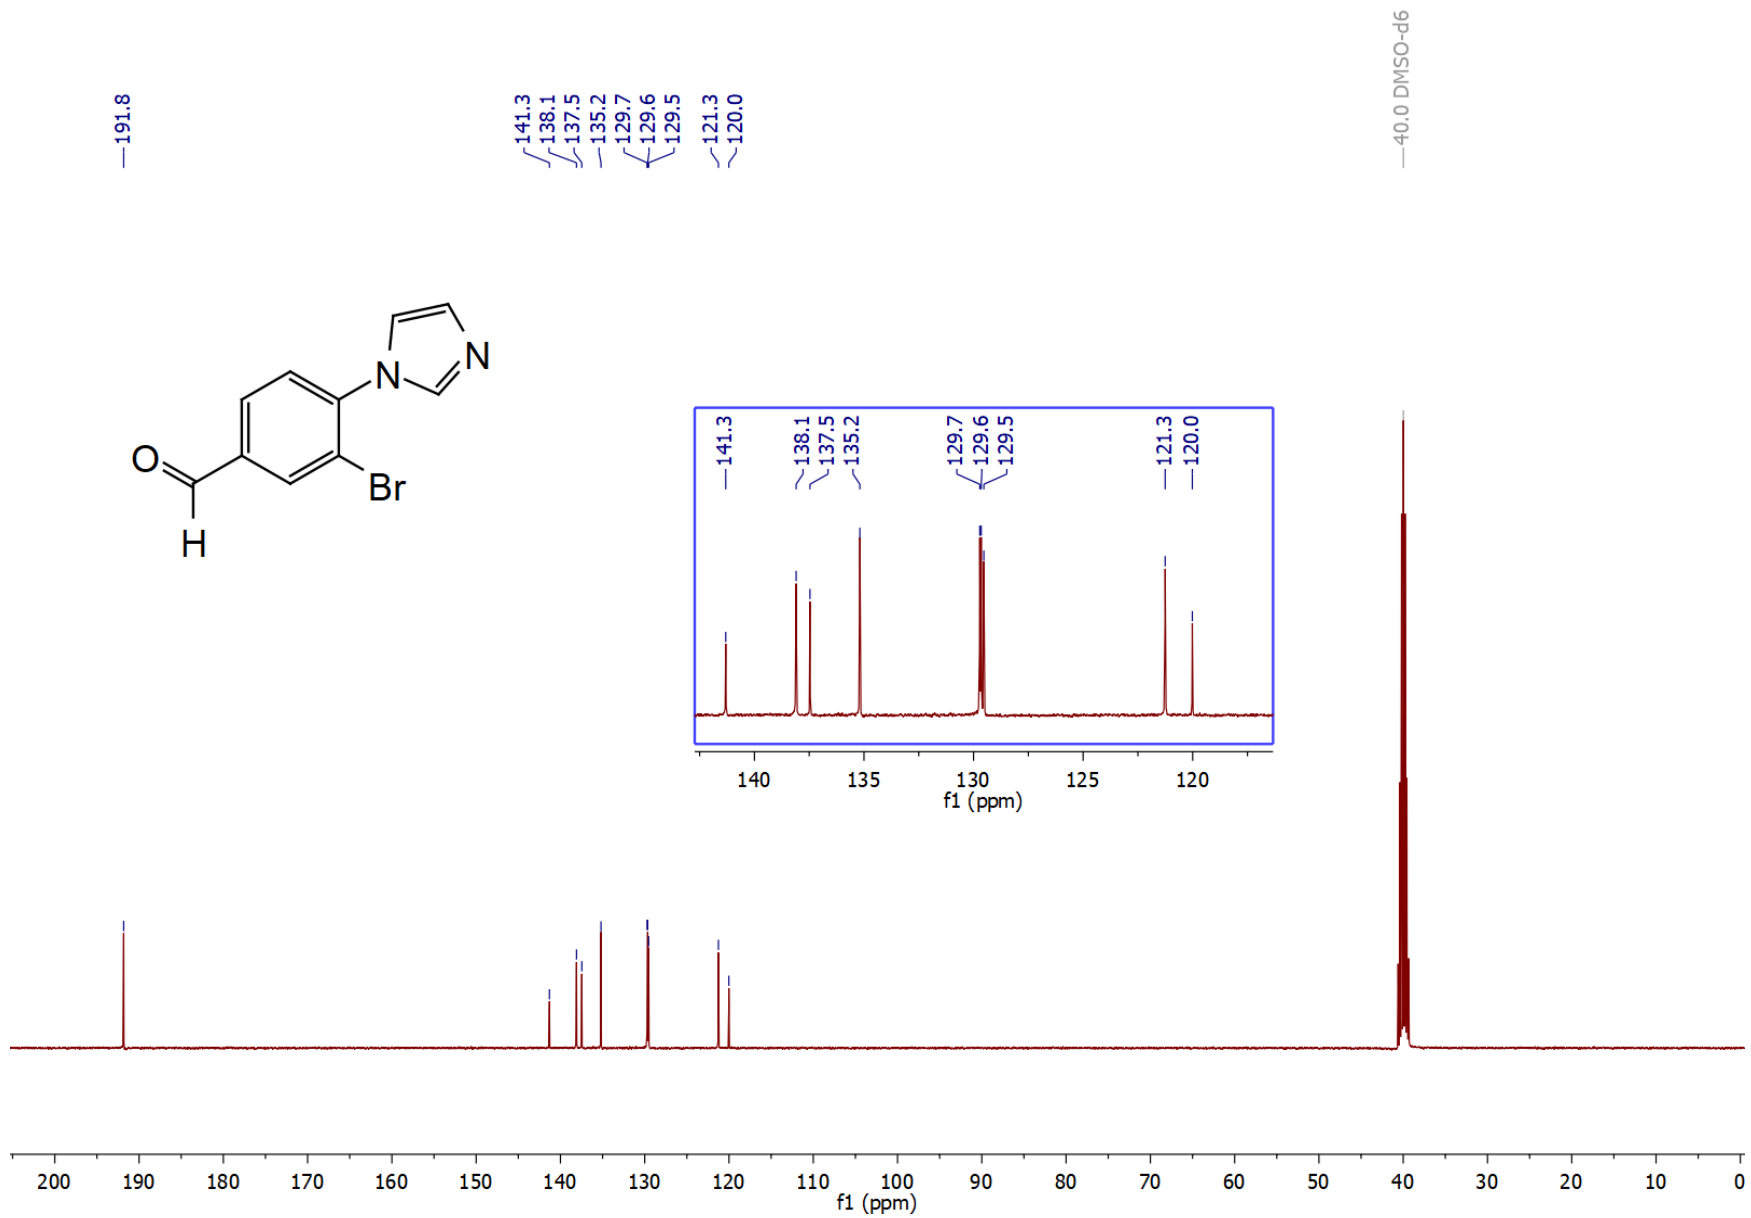

**Fragment 2**  
PC2043A\_FC.1.fid

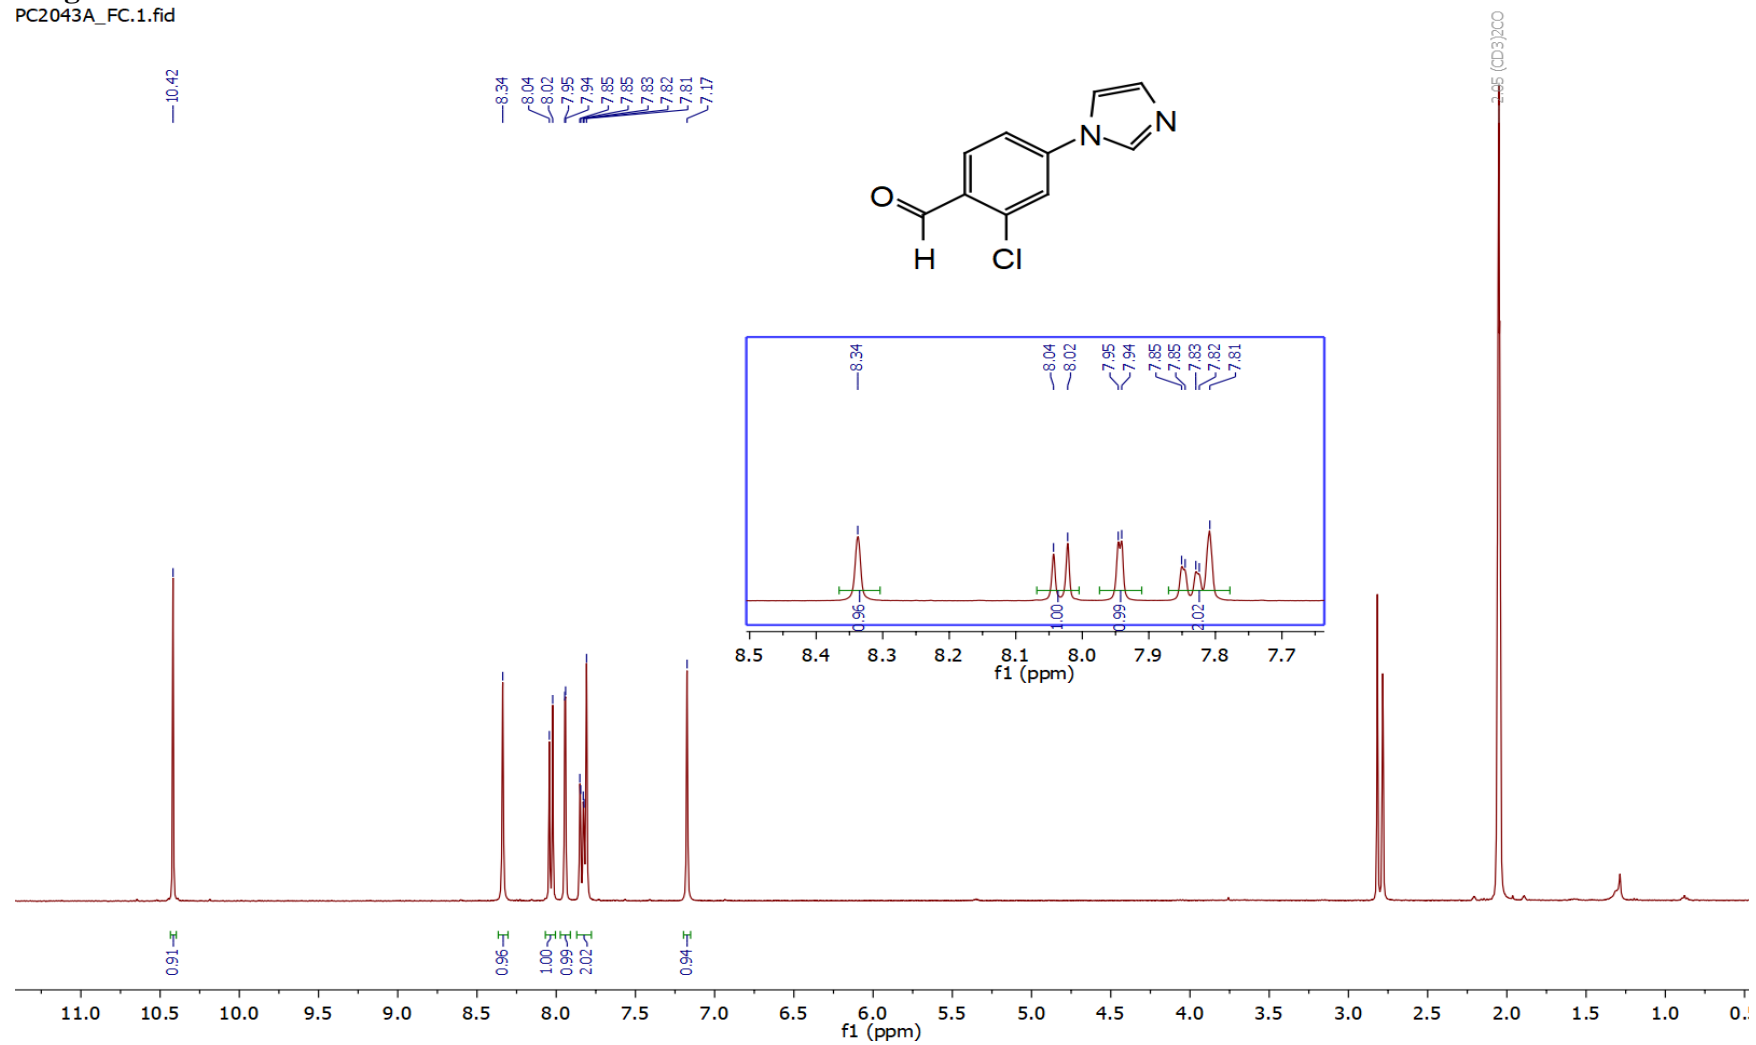

PC2043A\_FC.2.fid

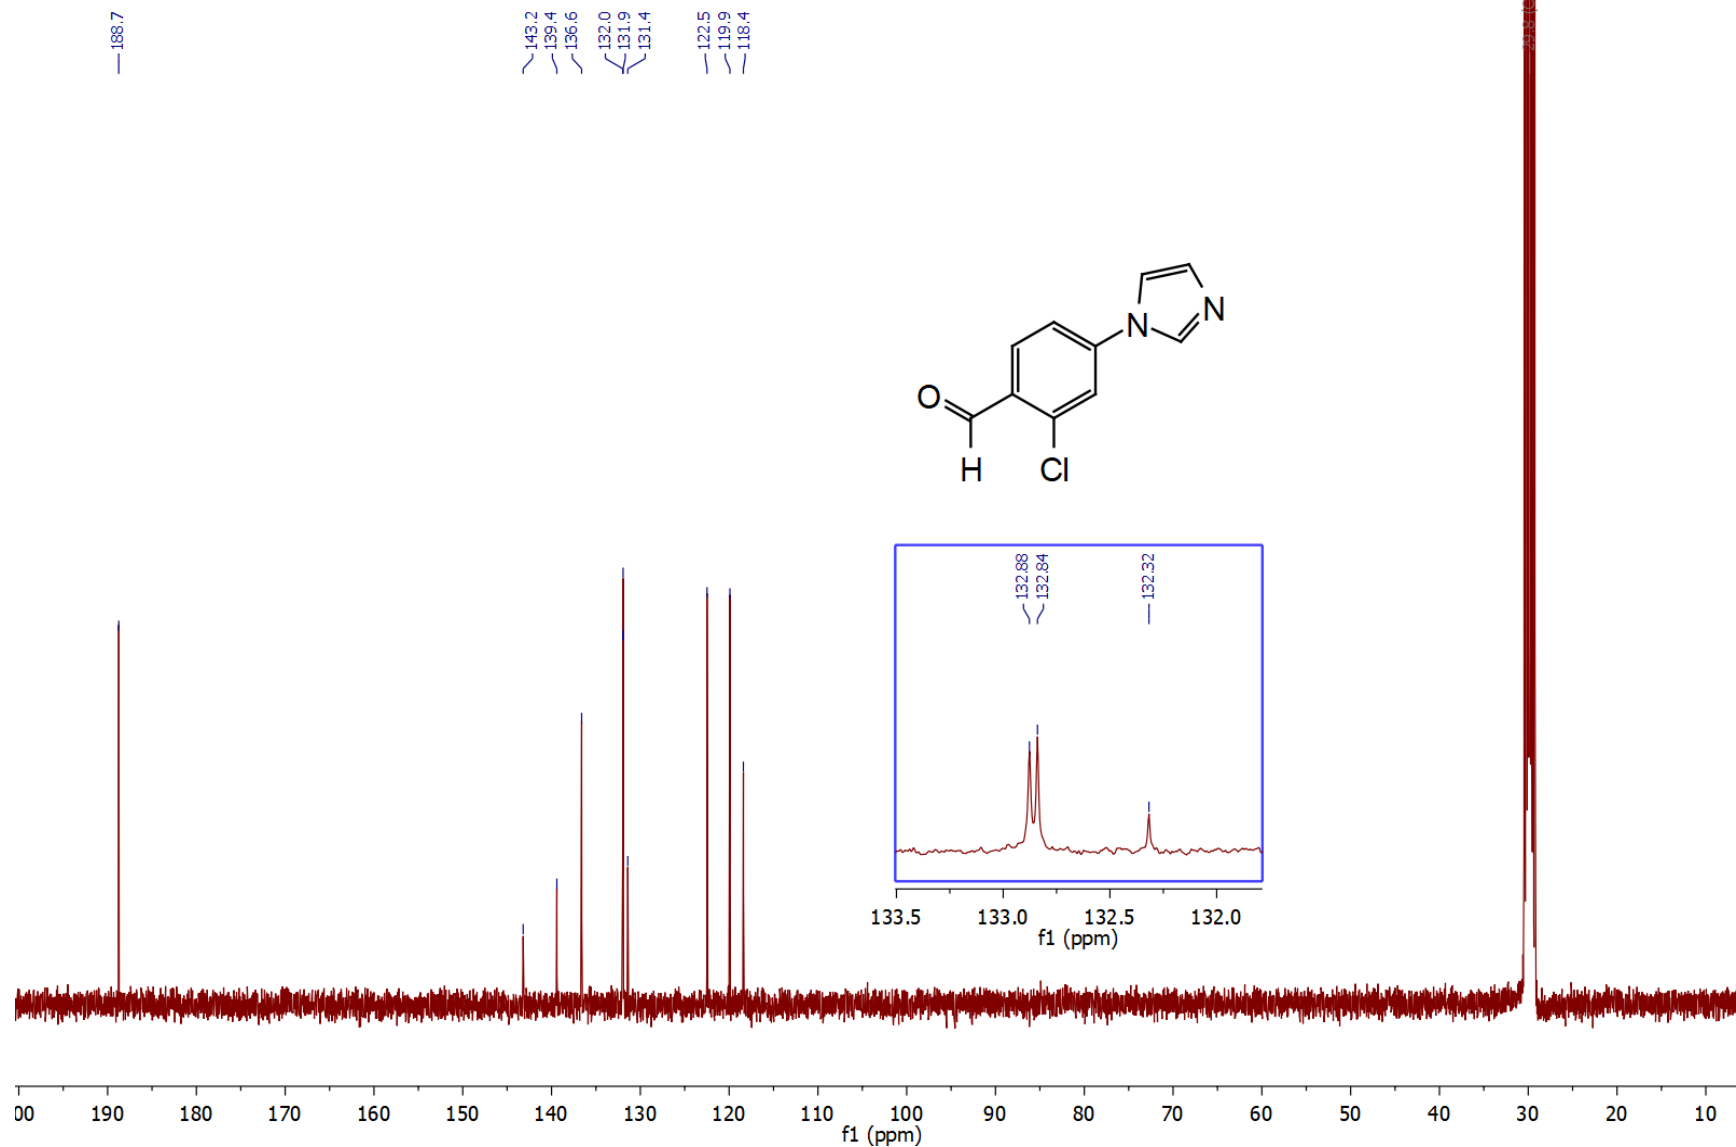

# Fragment 3

LvD1008\_Jan31.1.fid

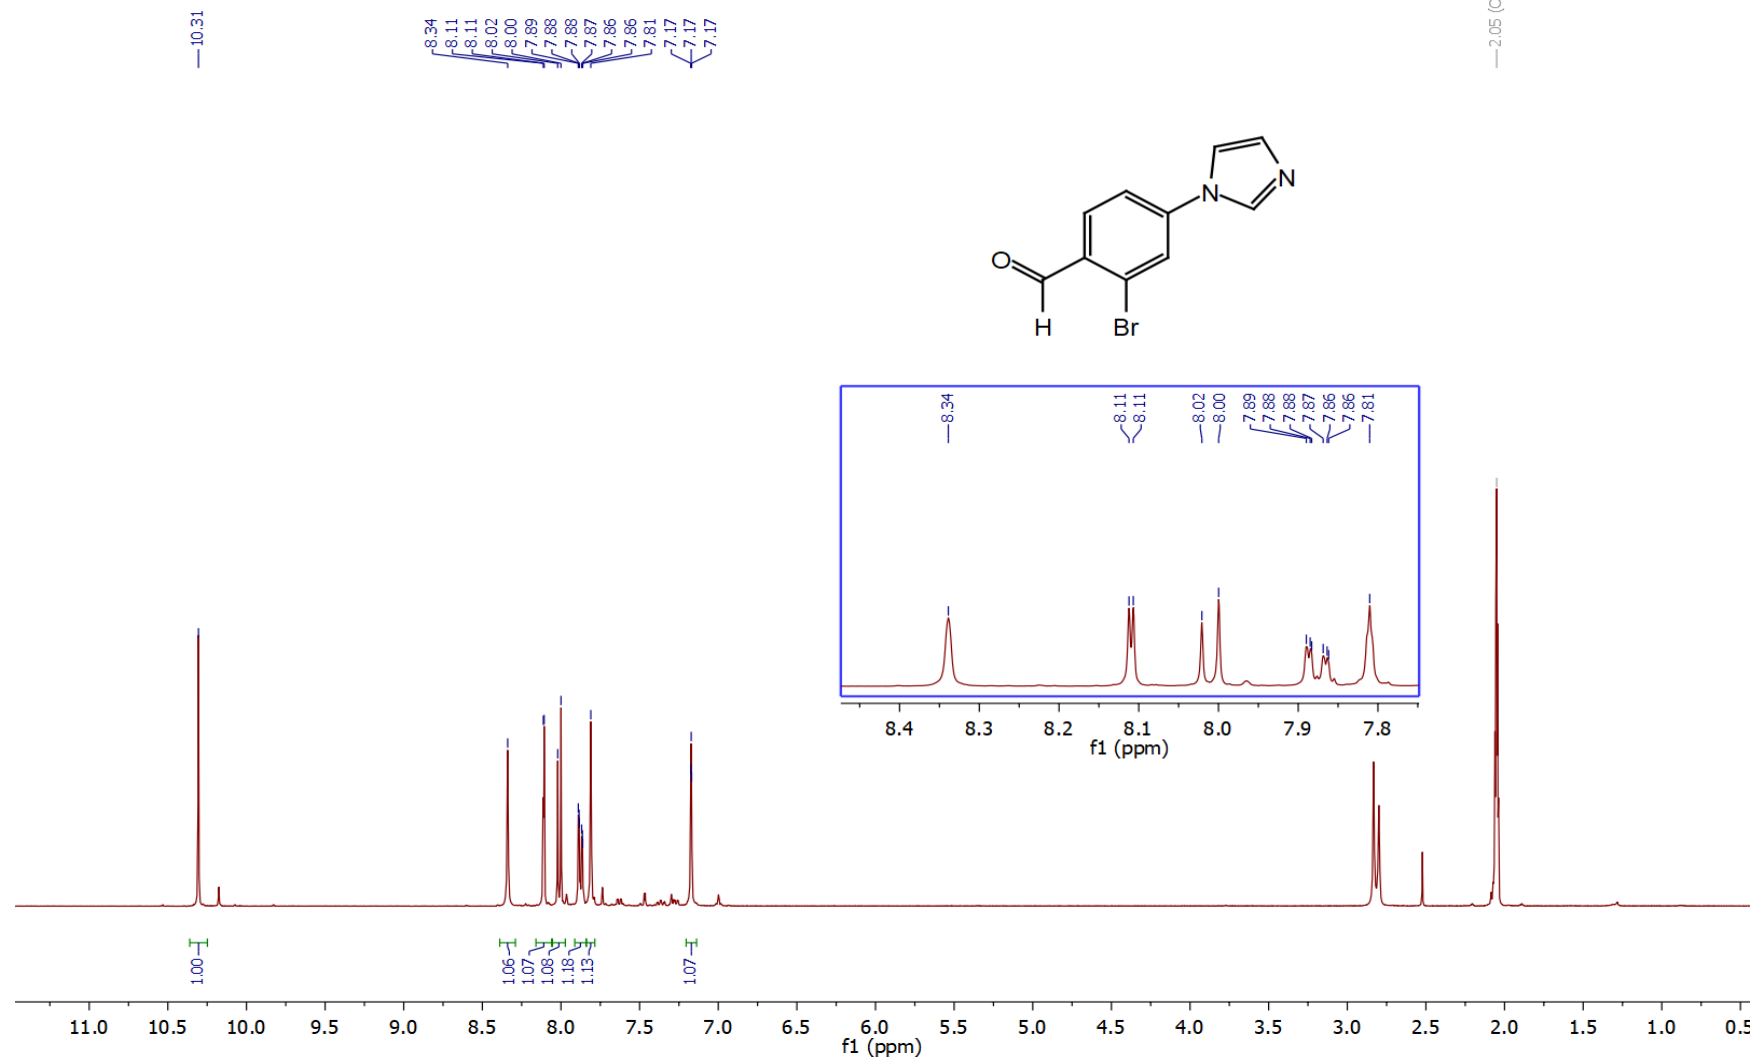

LvD1008\_Jan31.2.fid

—190.7

—143.2  
—136.6  
—132.5  
—132.2  
—132.0  
—128.2  
—125.7  
—120.5  
—118.4

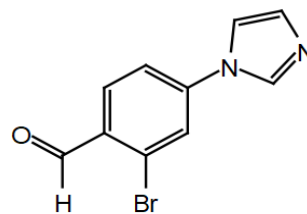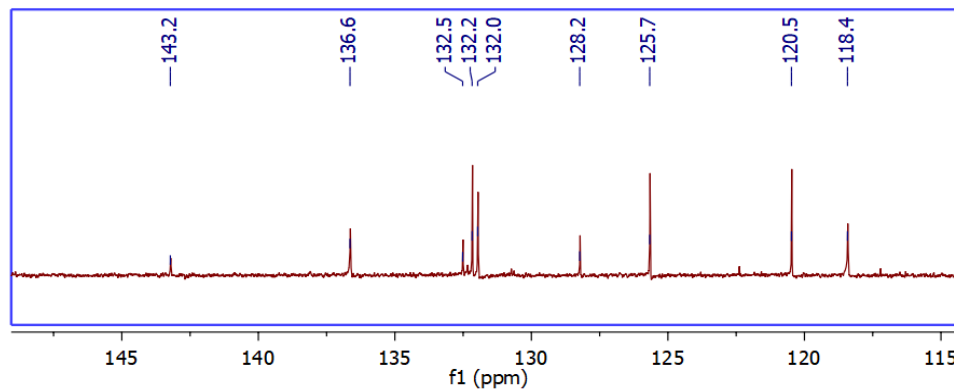

29.6 (CDCl3)

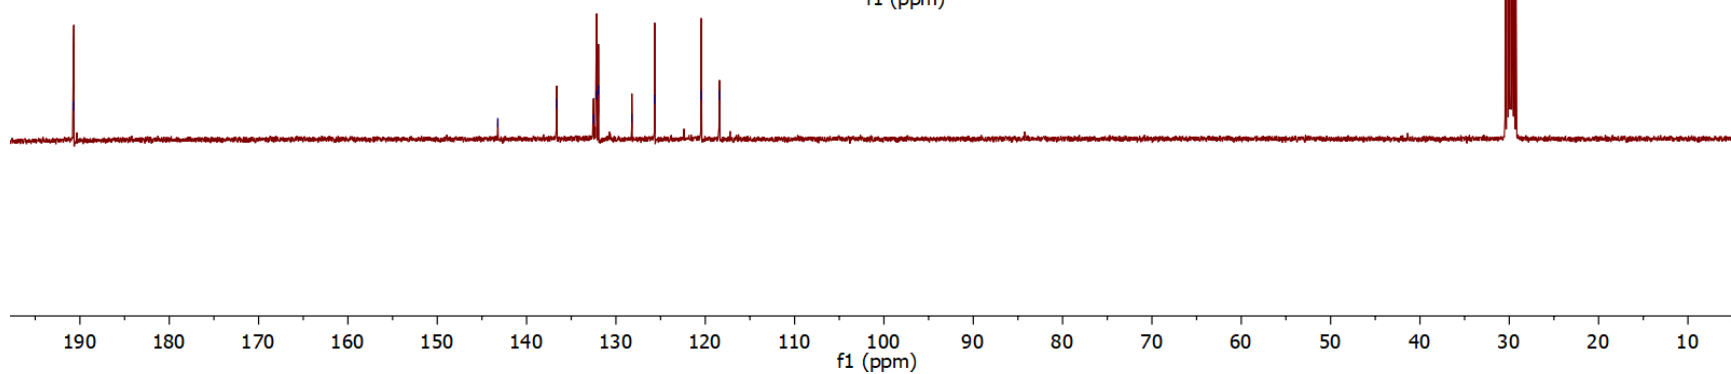

# Fragment 4

LvD1002F1\_Jan31.1.fid

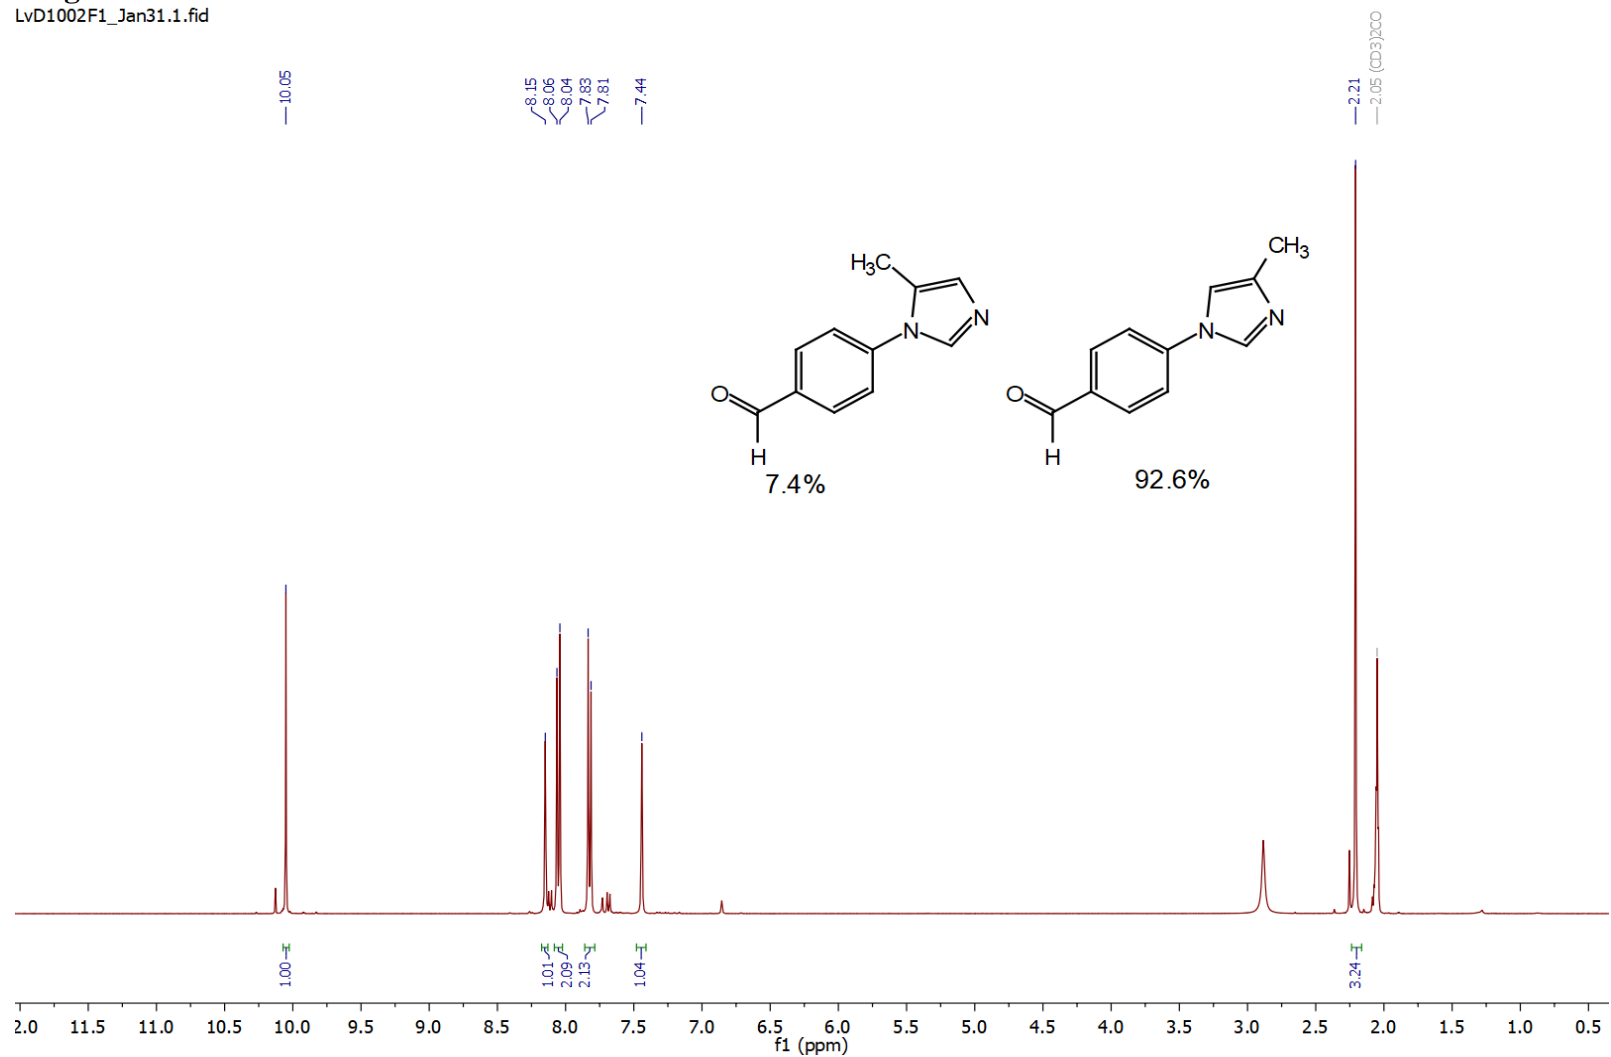

LvD1002F1\_Jan31.2.fid

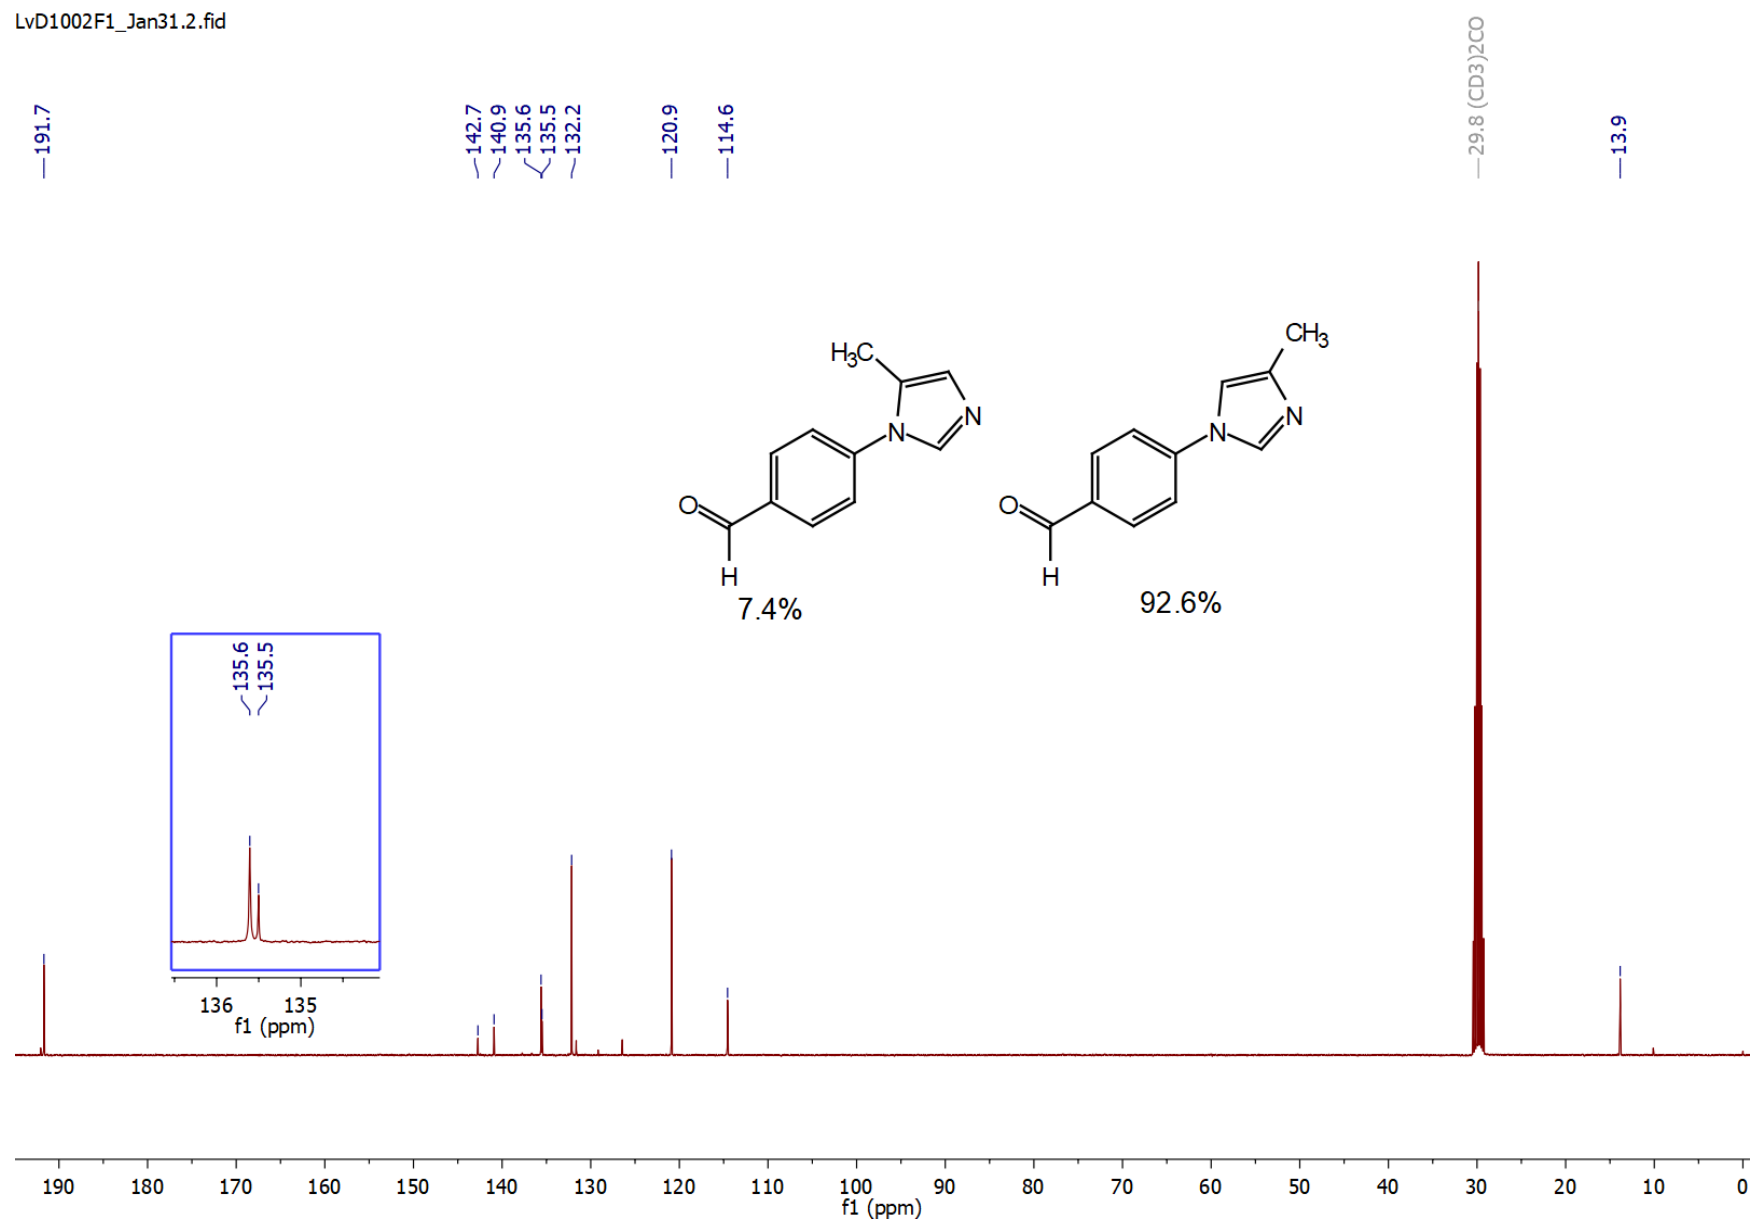



# Fragment 6

LvD1005\_Jan31.1.fid

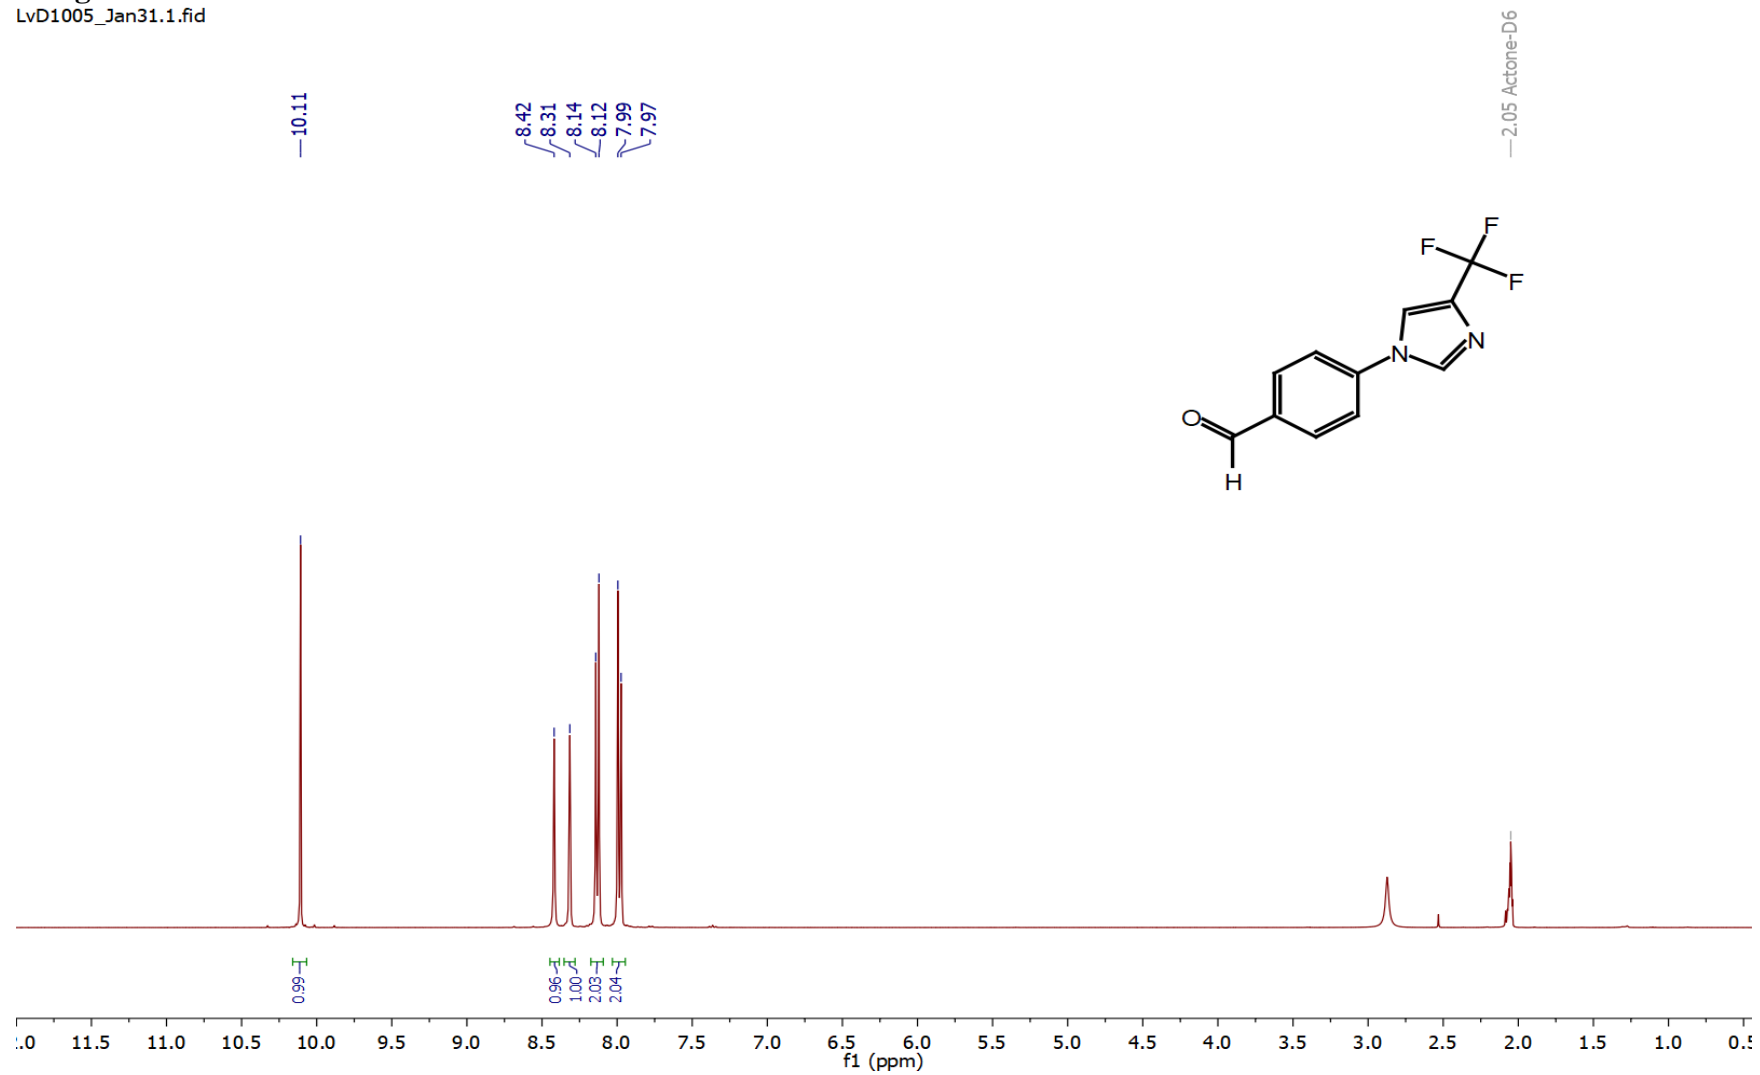

LvD1005\_Jan31.2.fid

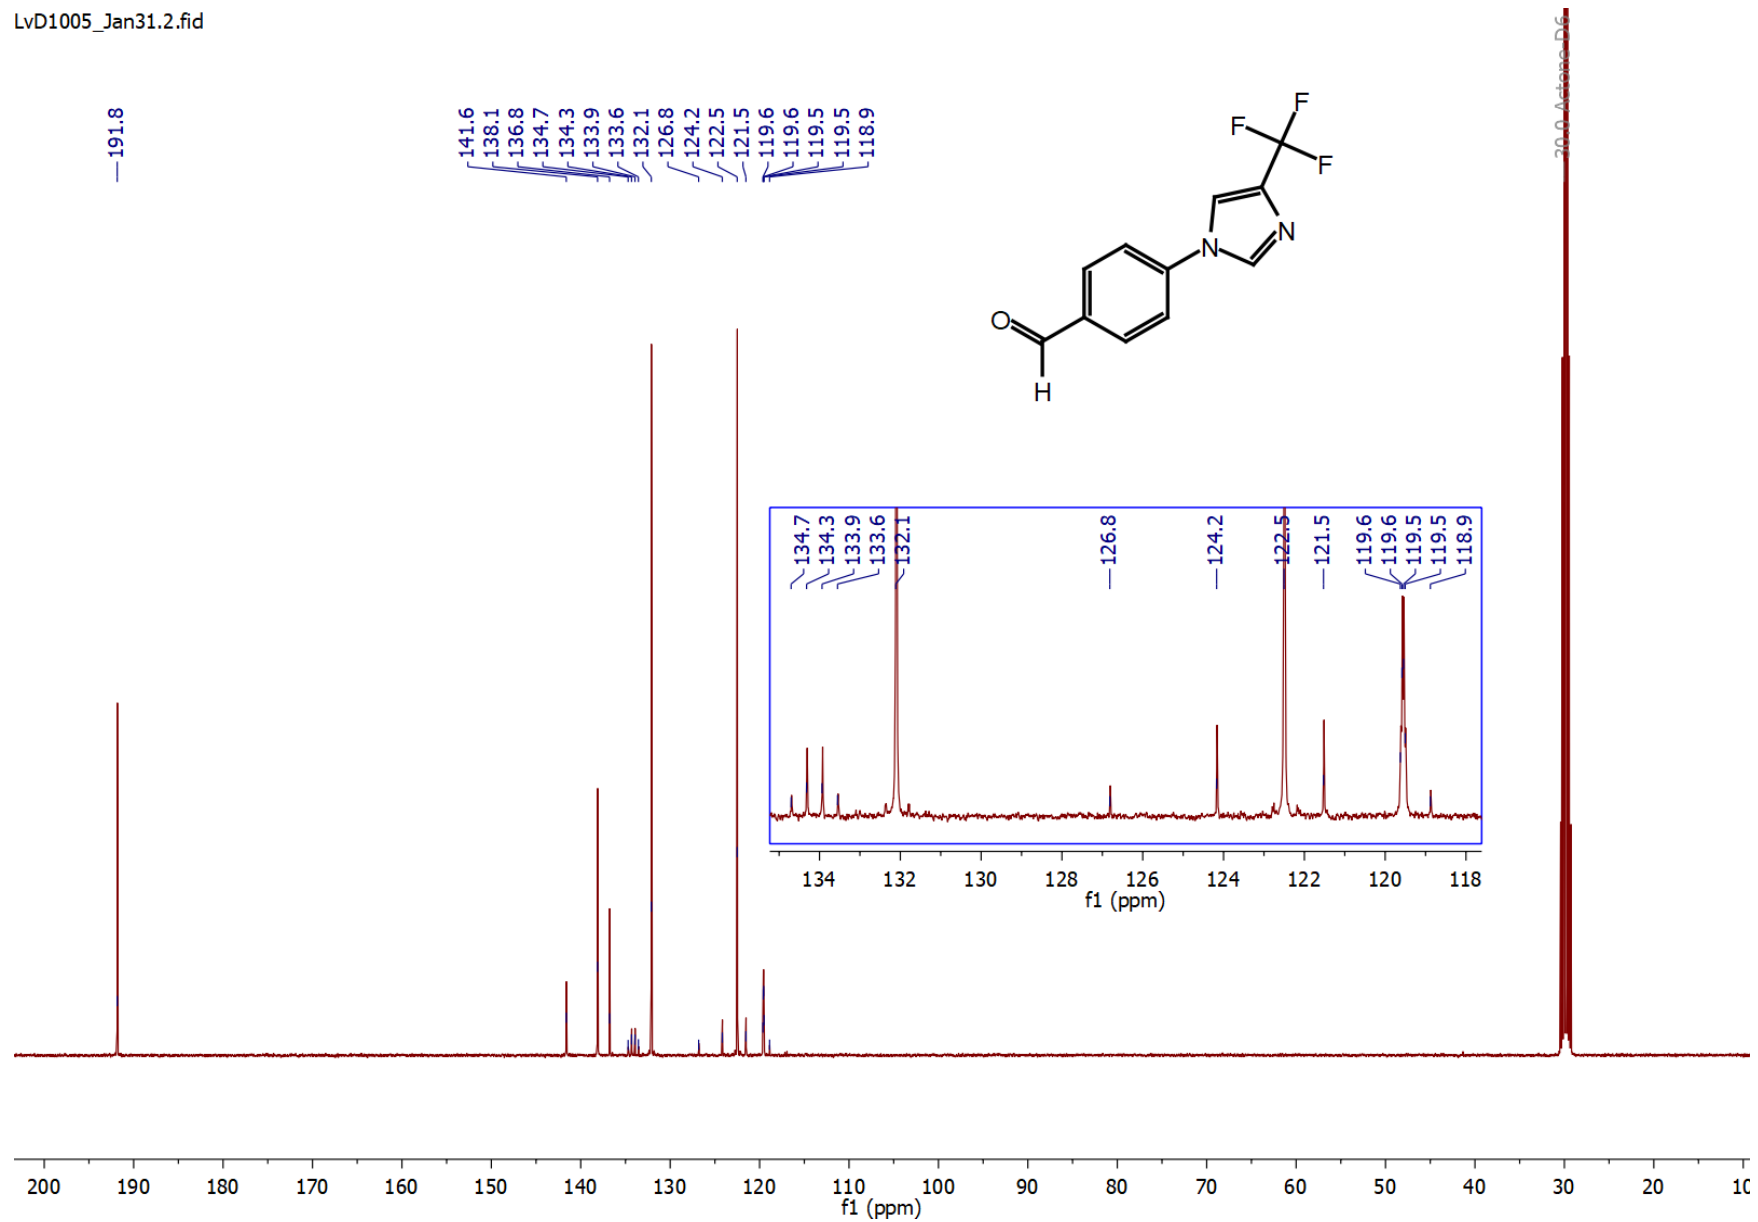

# Fragment 7

LvD1007C1.1.fid

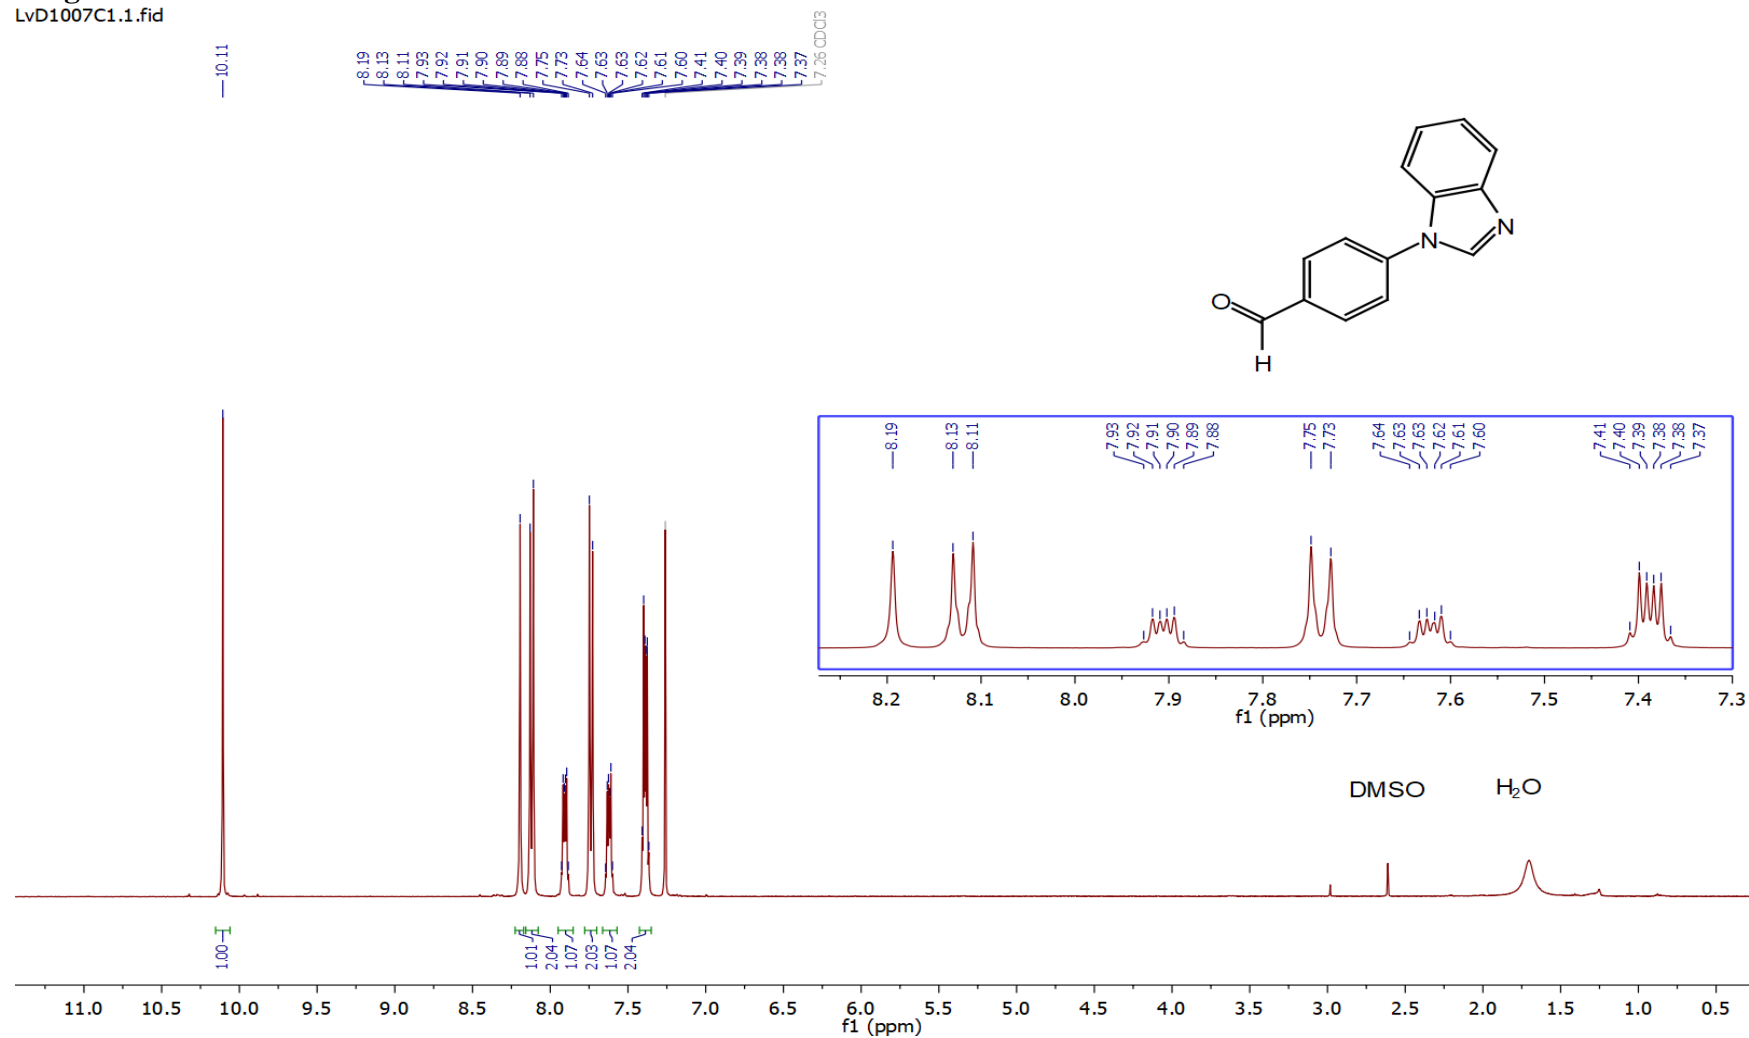

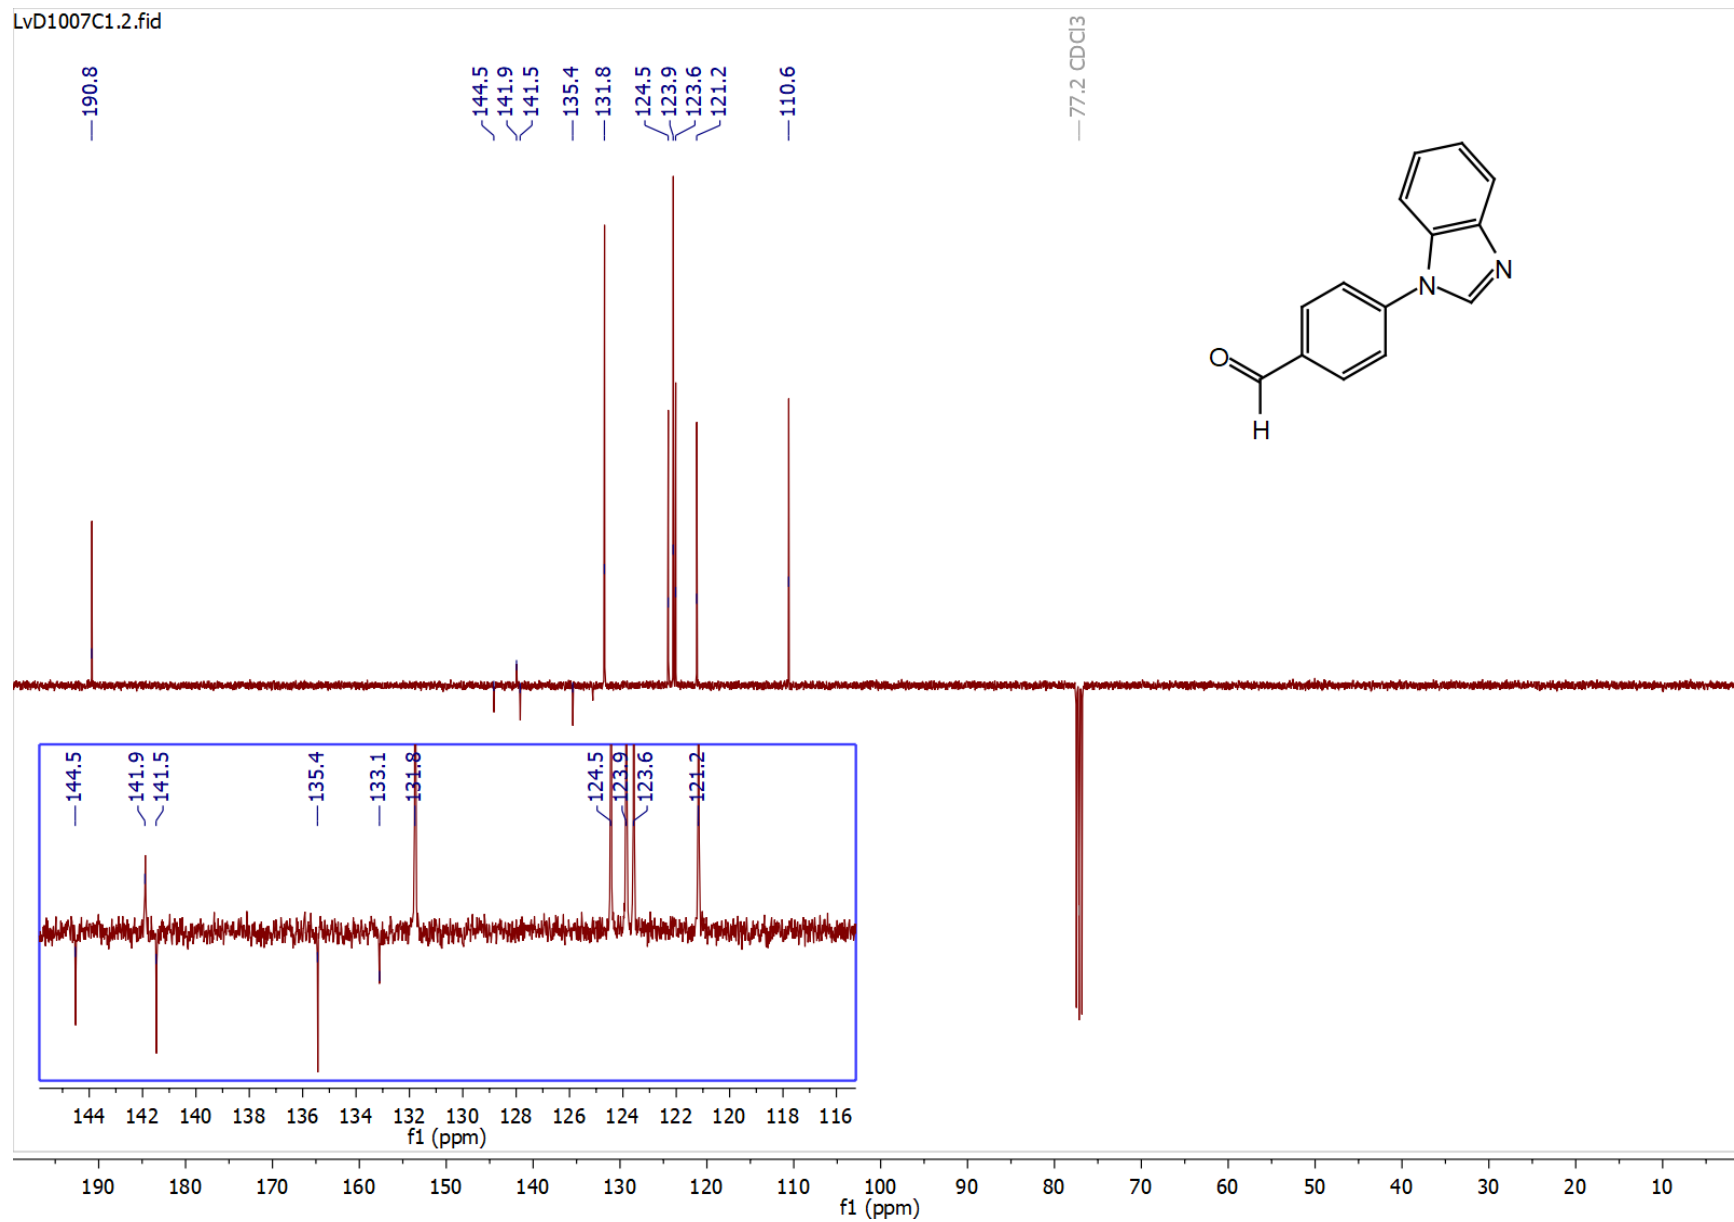

# Fragment 8

PC2033\_FC.1.fid

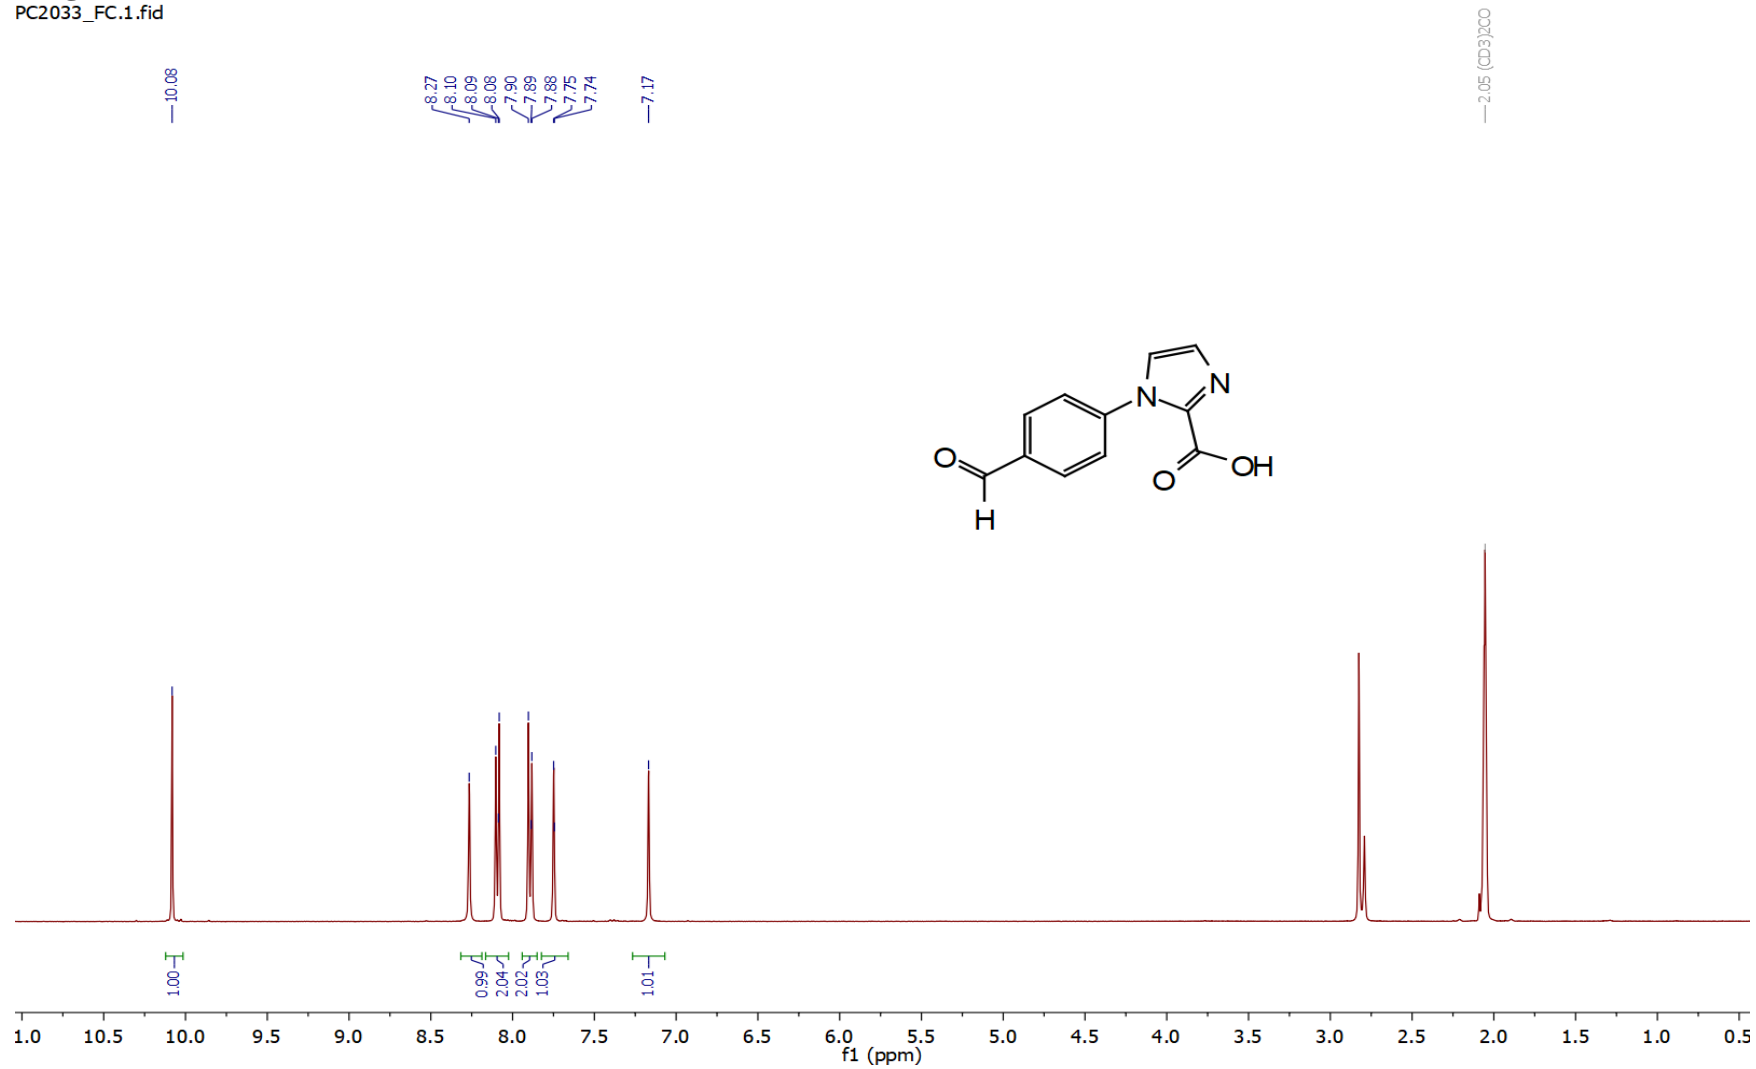

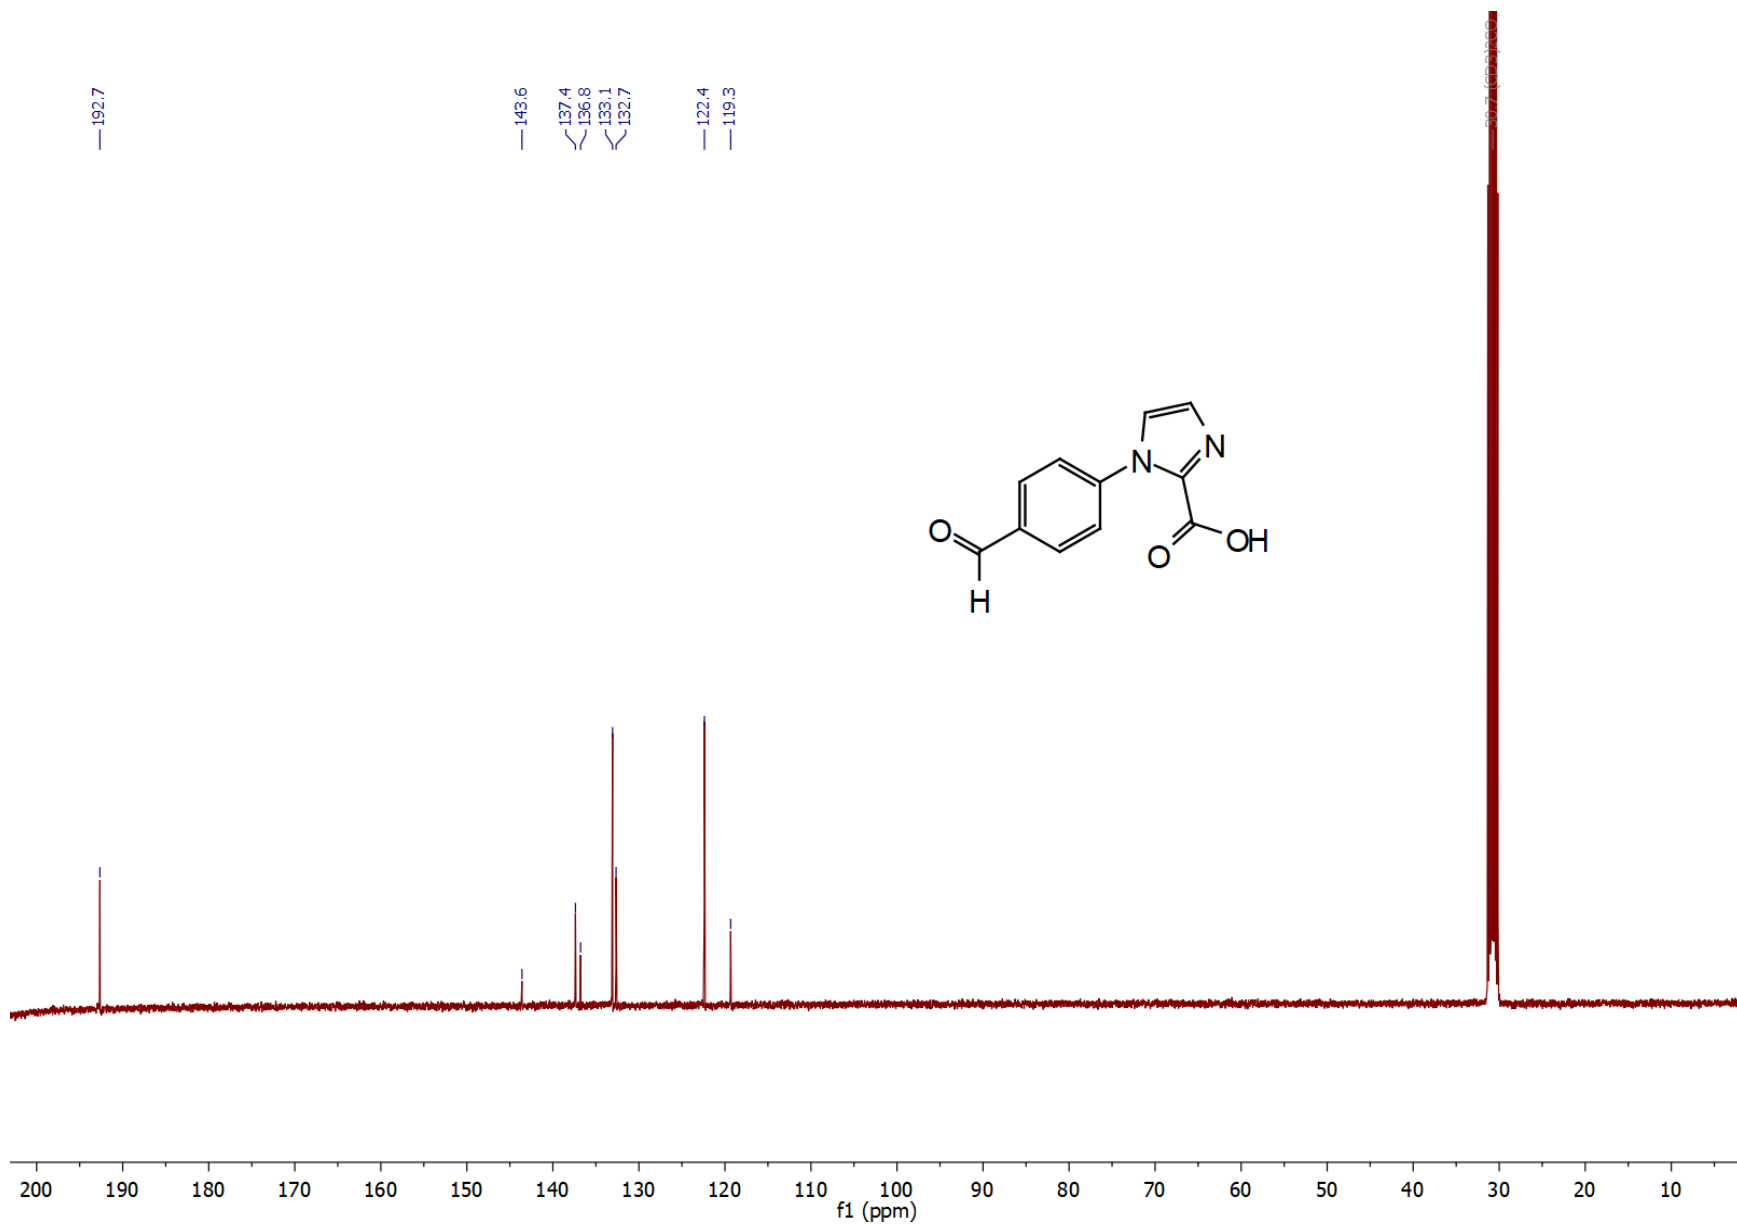

# Fragment 9

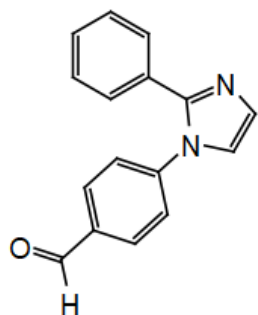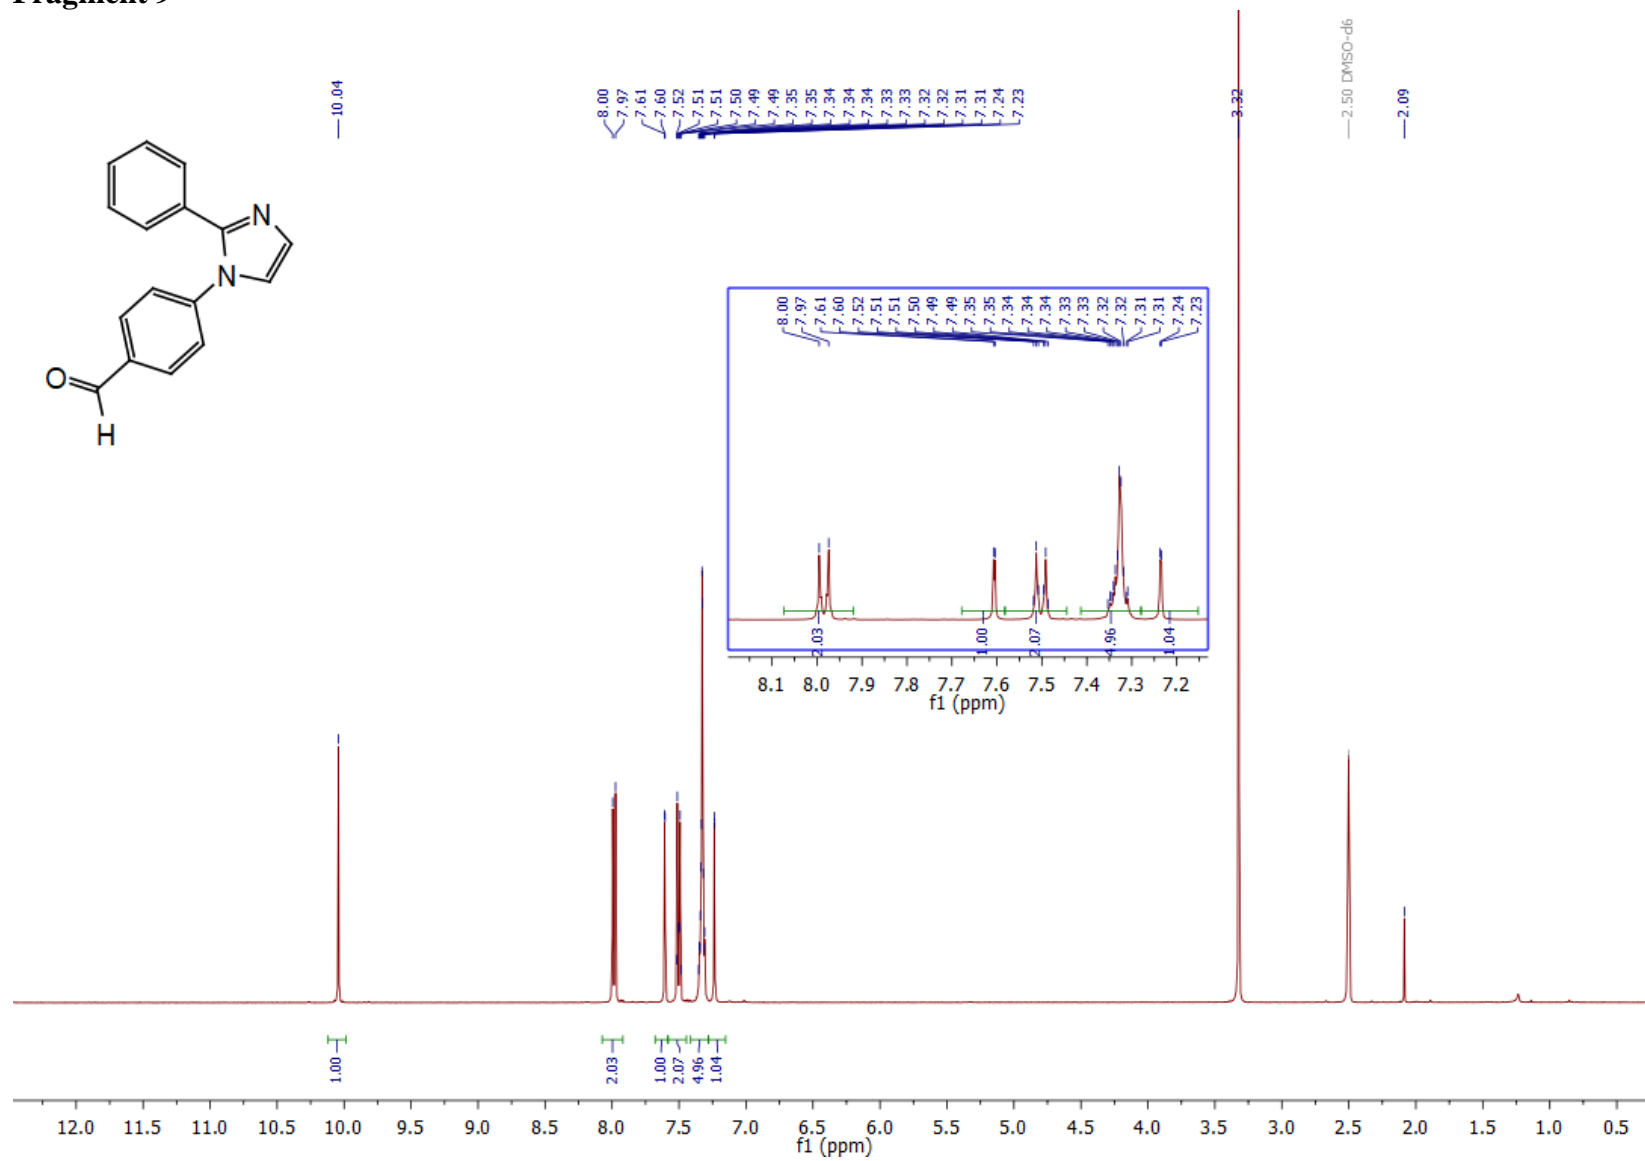

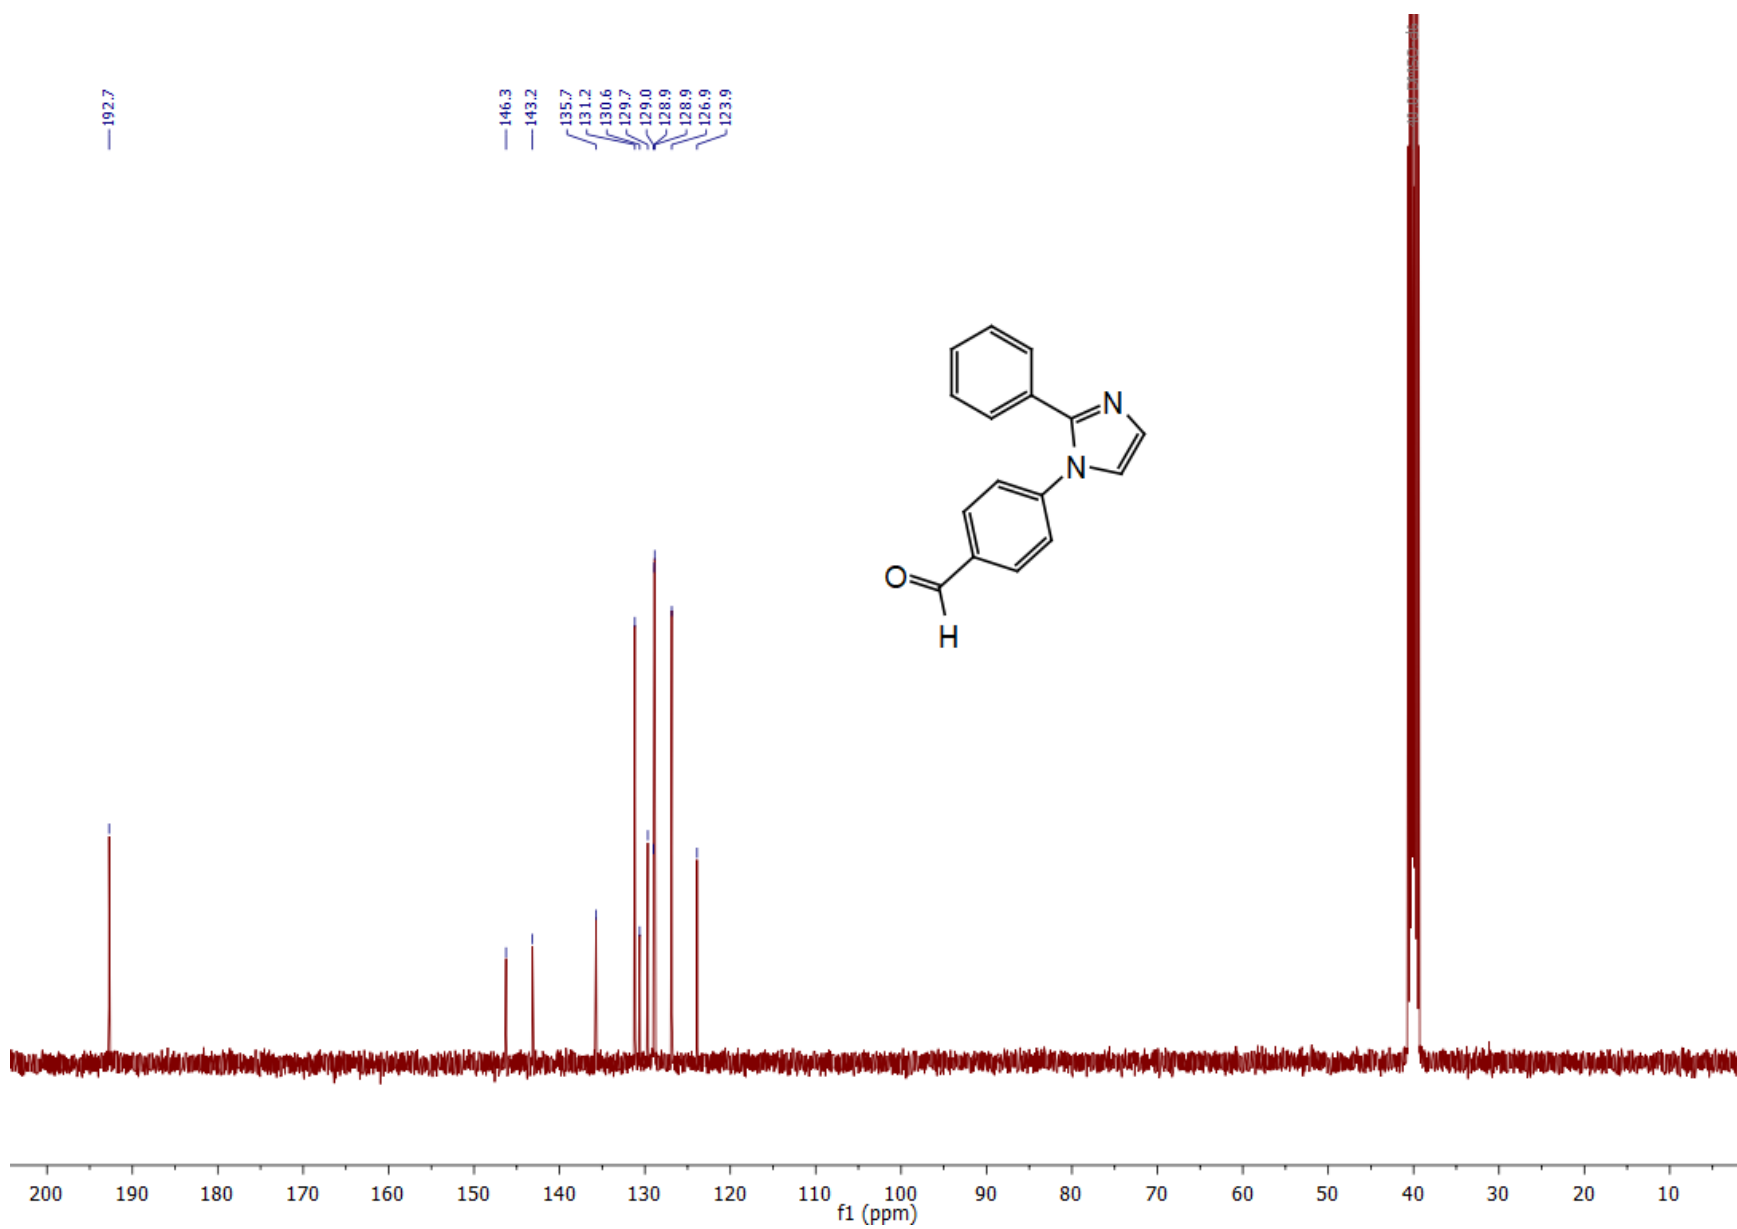



# Fragment 10

LVD1017.1.fid

—10.43

7.96  
7.93  
7.59  
7.53  
7.44  
7.43  
7.42  
7.41  
7.39  
7.38  
7.36  
7.34  
7.33  
7.32

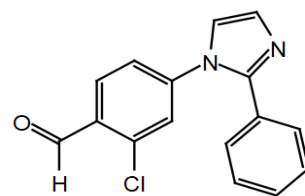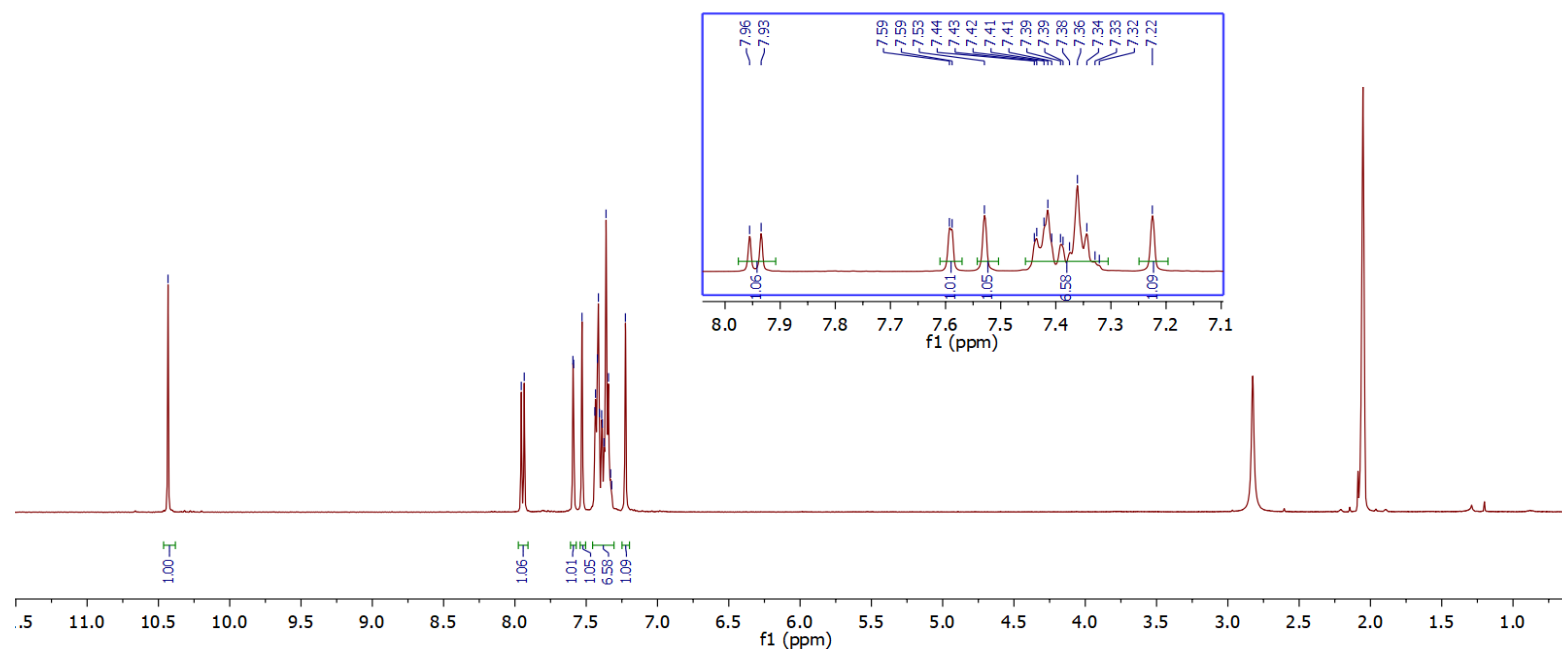

LvD1017\_Feb14.2.fid

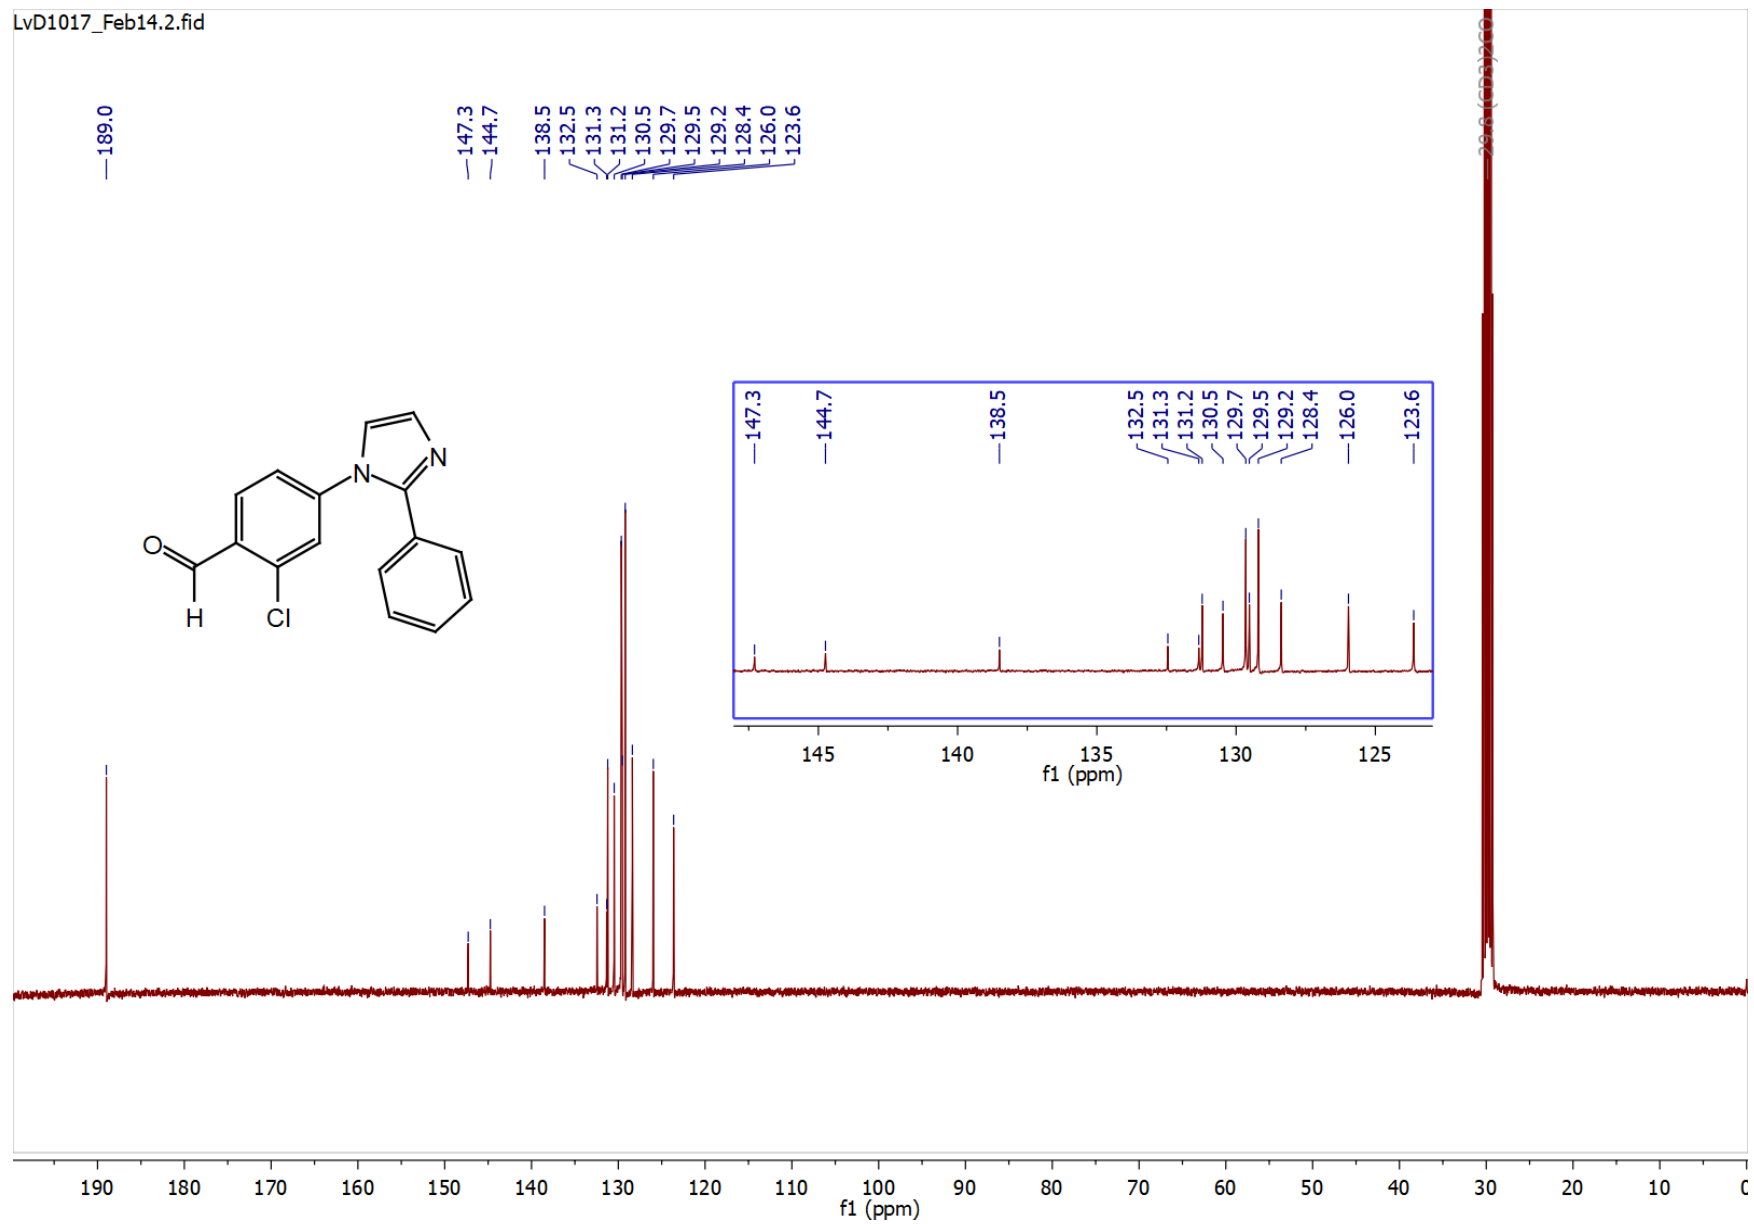

**Fragment 11**  
PC2043B\_FC.1.fid

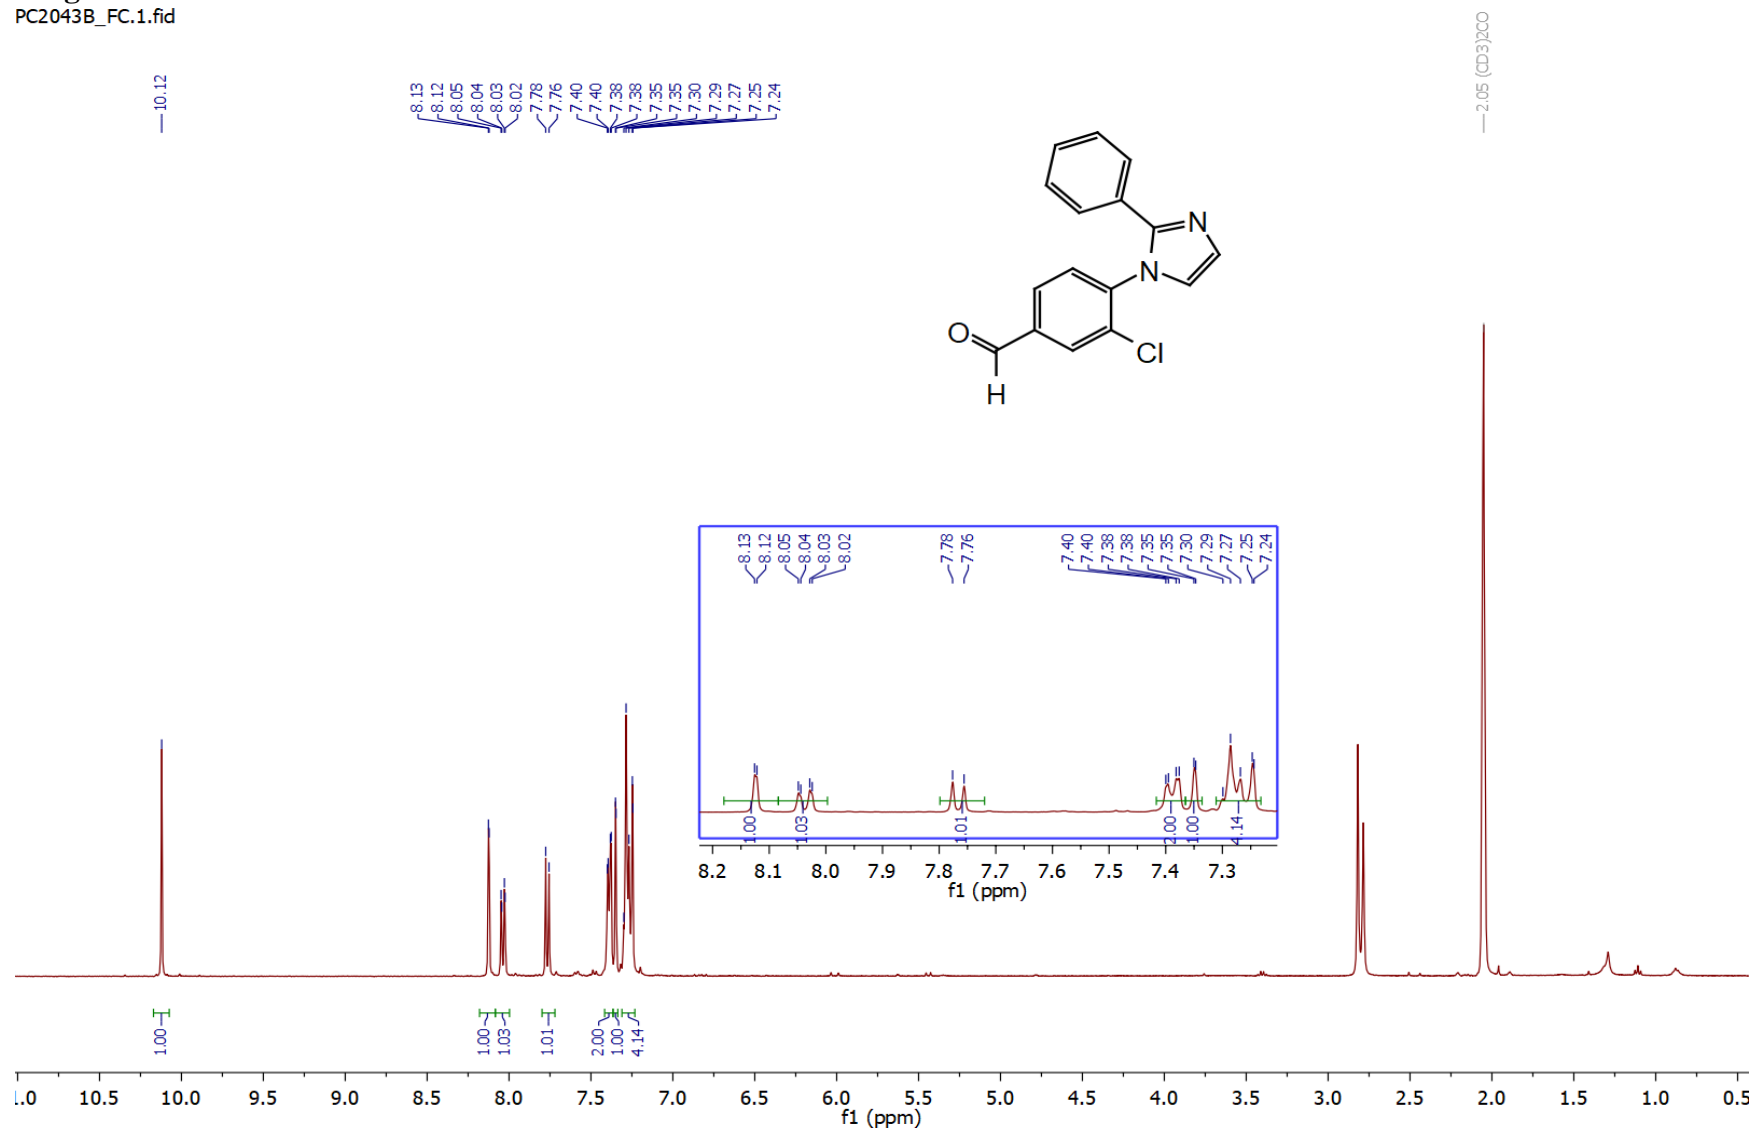

PC2043B\_FC.2.fid

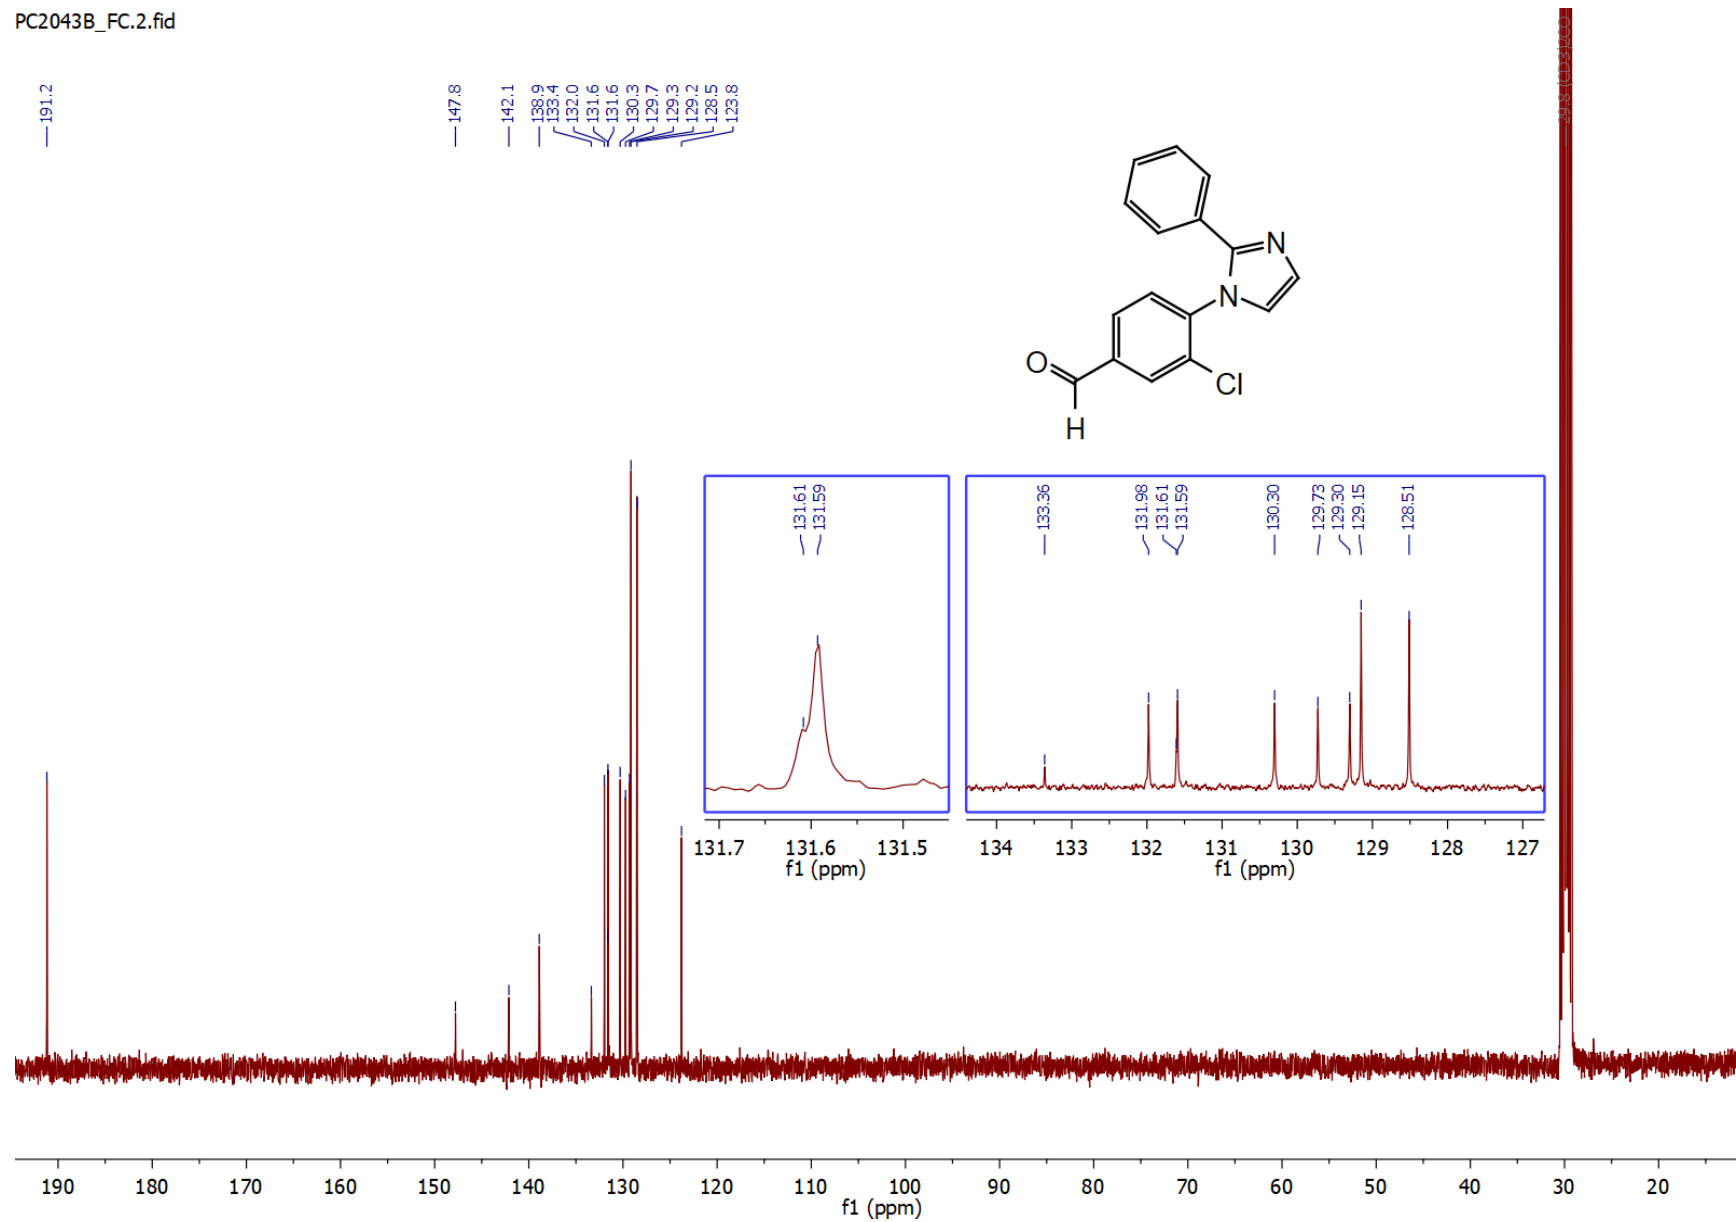

# Fragment 12

LvD1010F1.1.fid

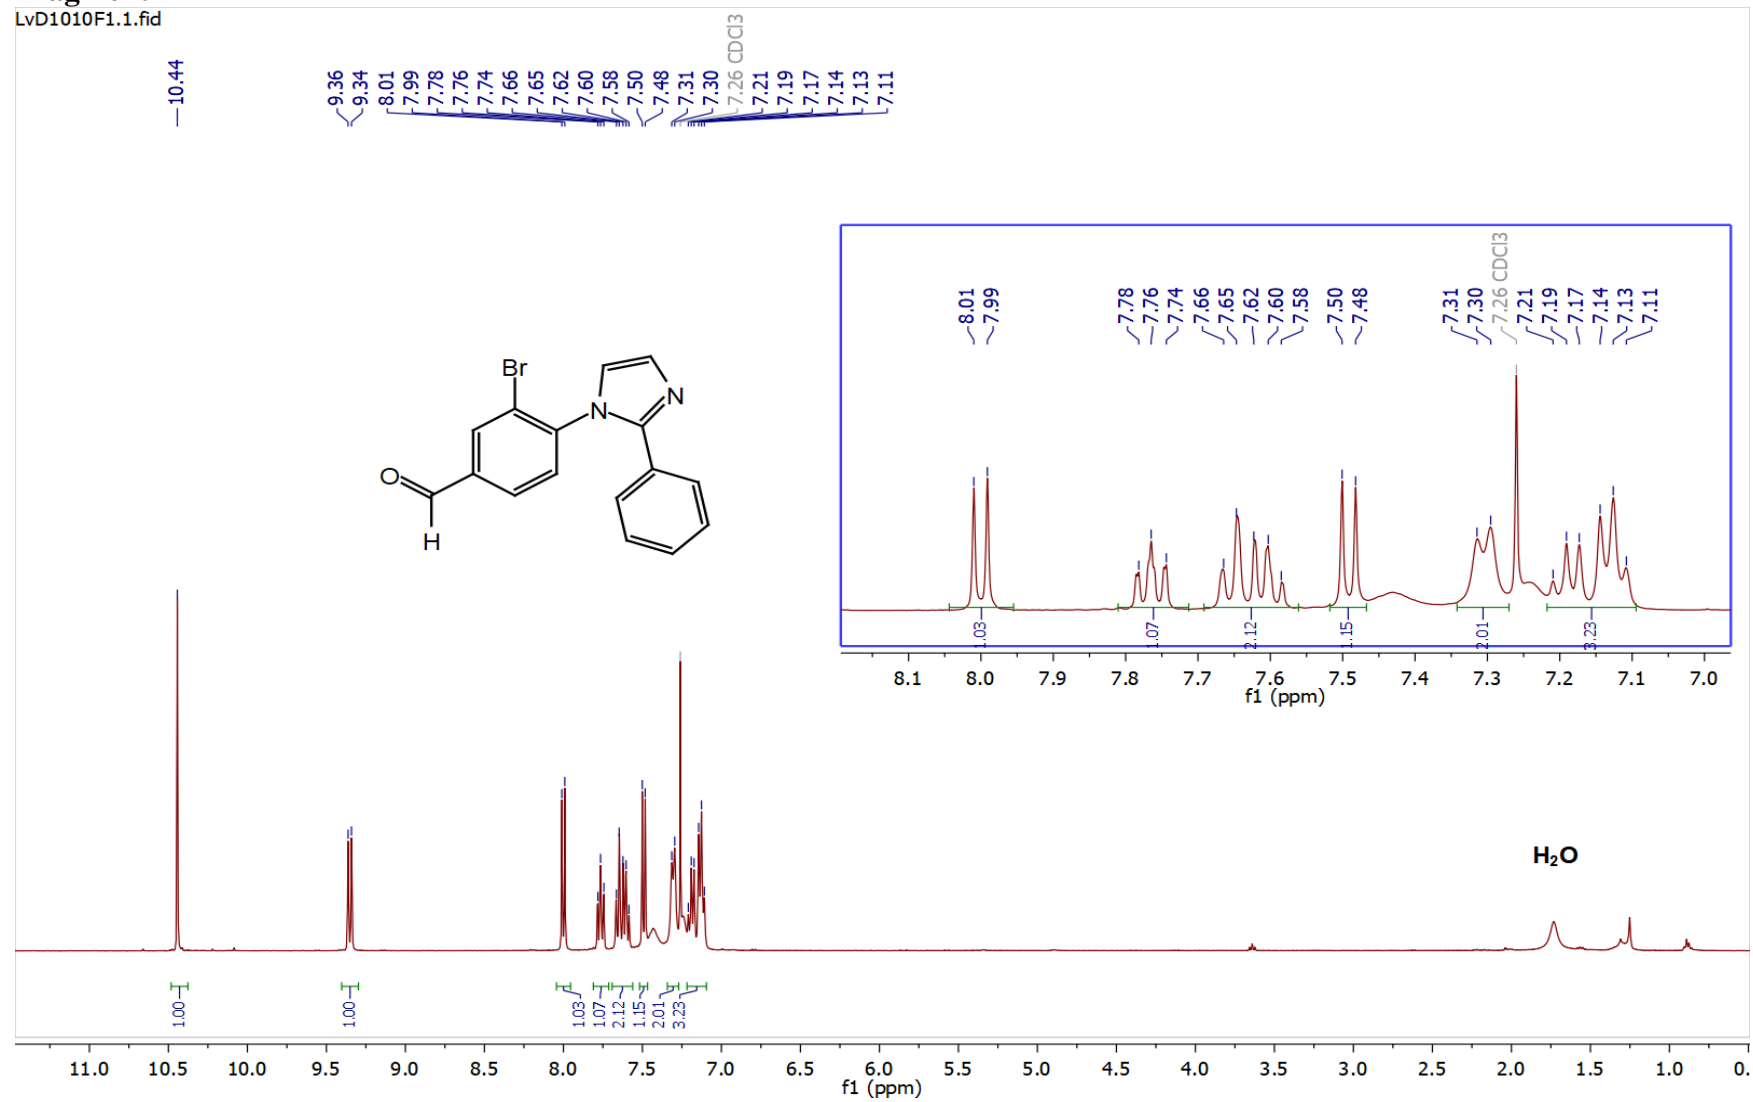

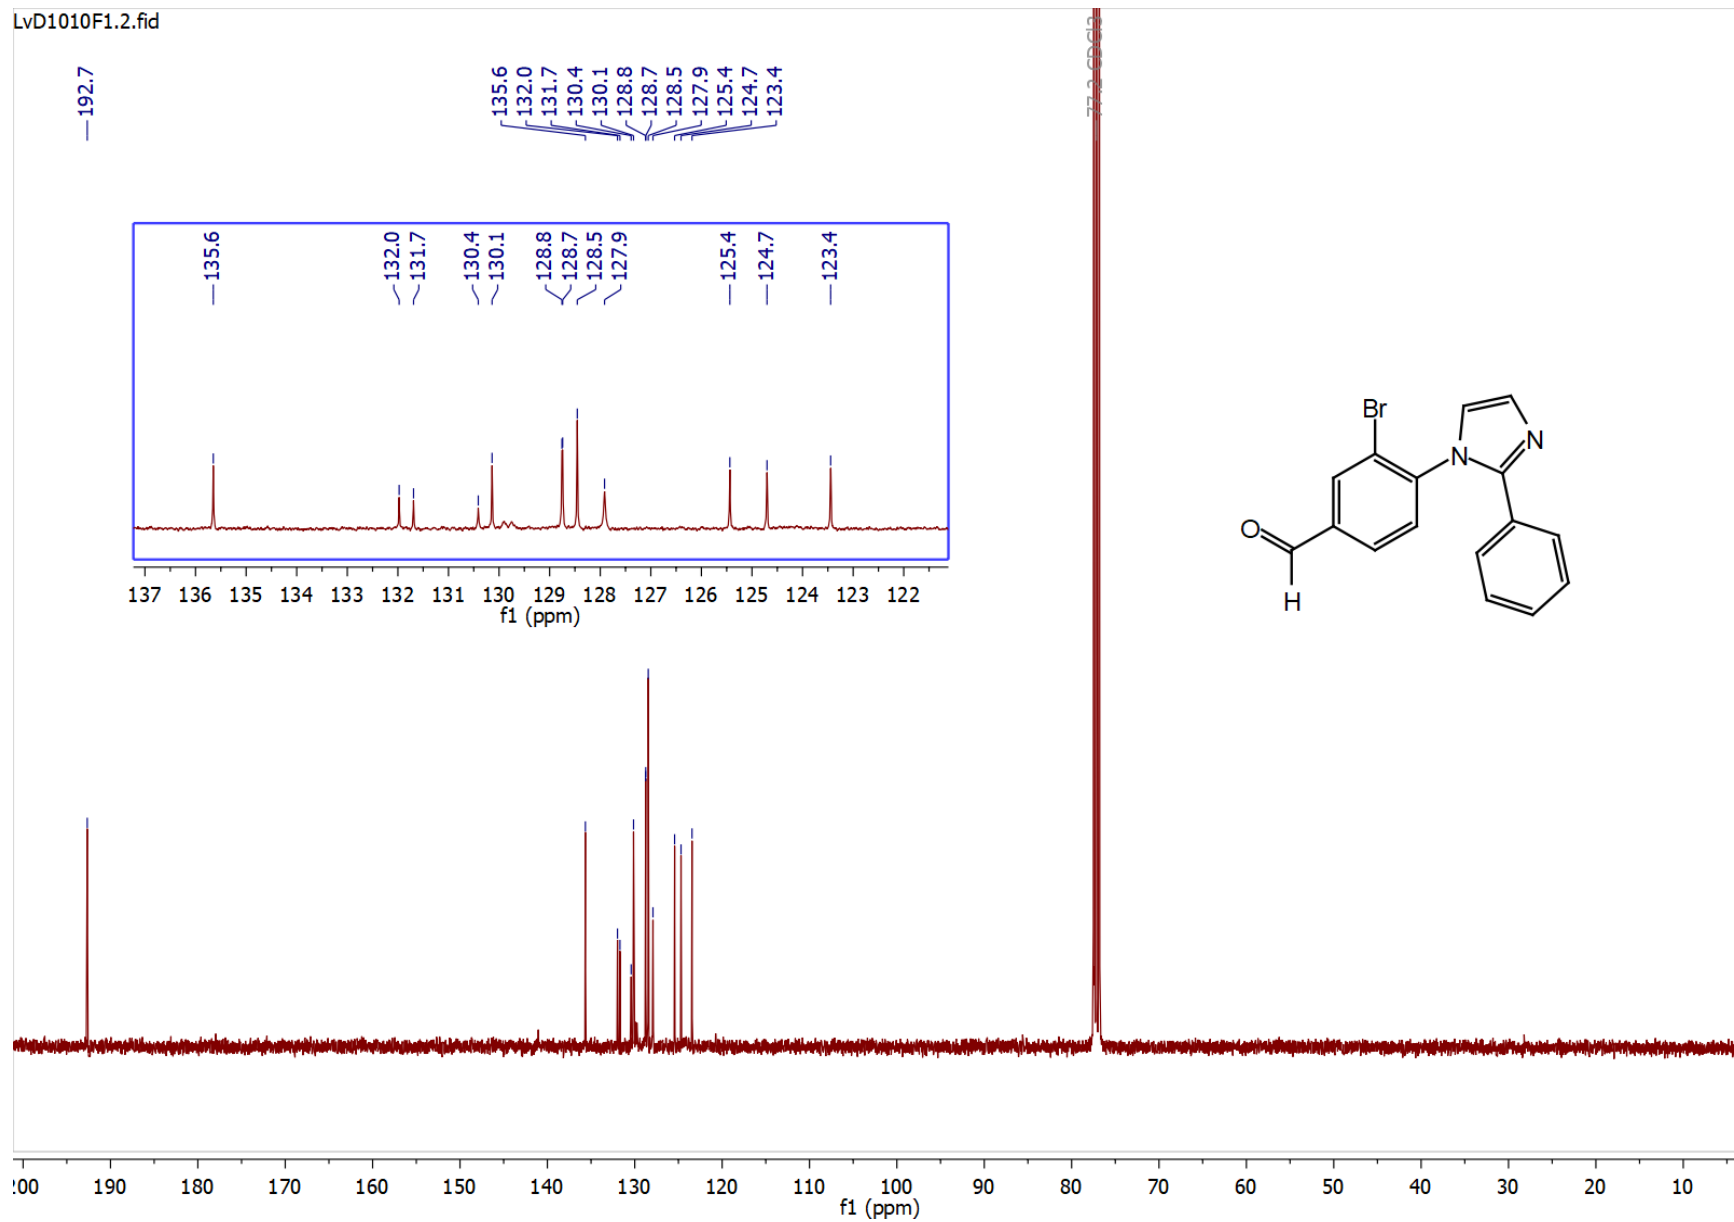

# Fragment 13

LvD1009.1.fid

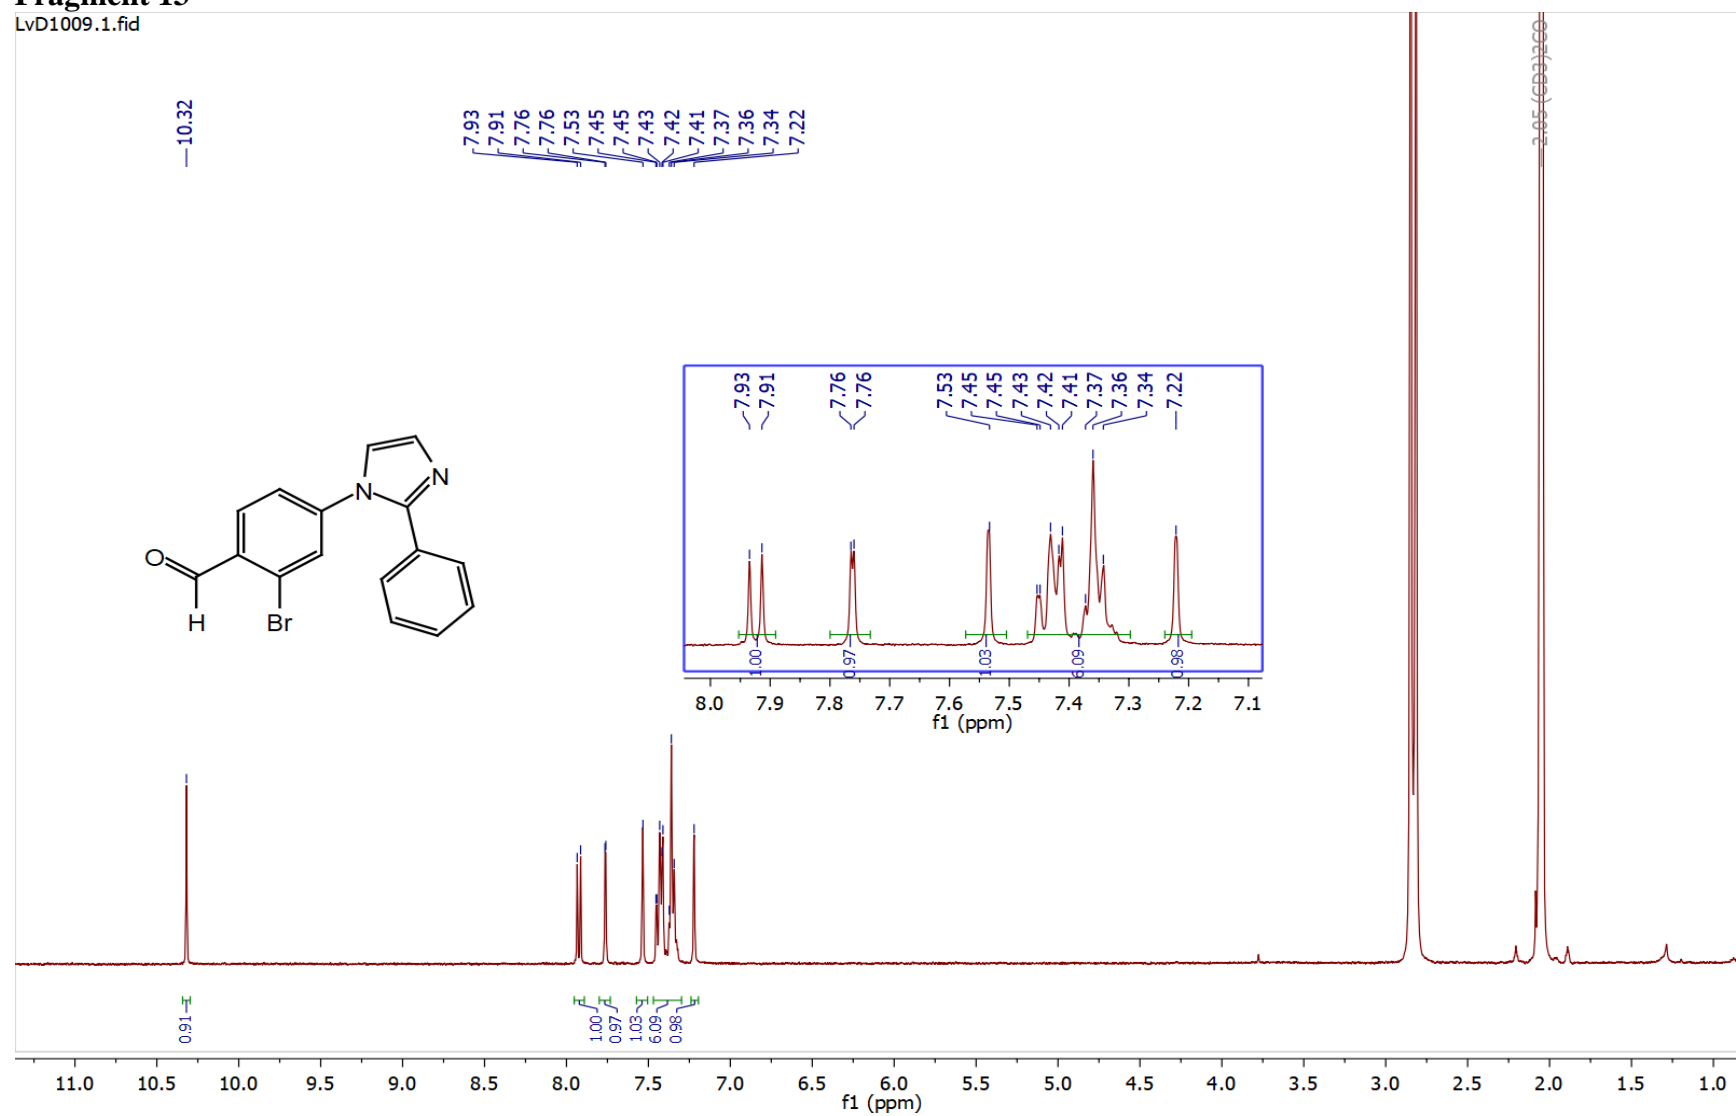

LvD\_1009F1.2.fid

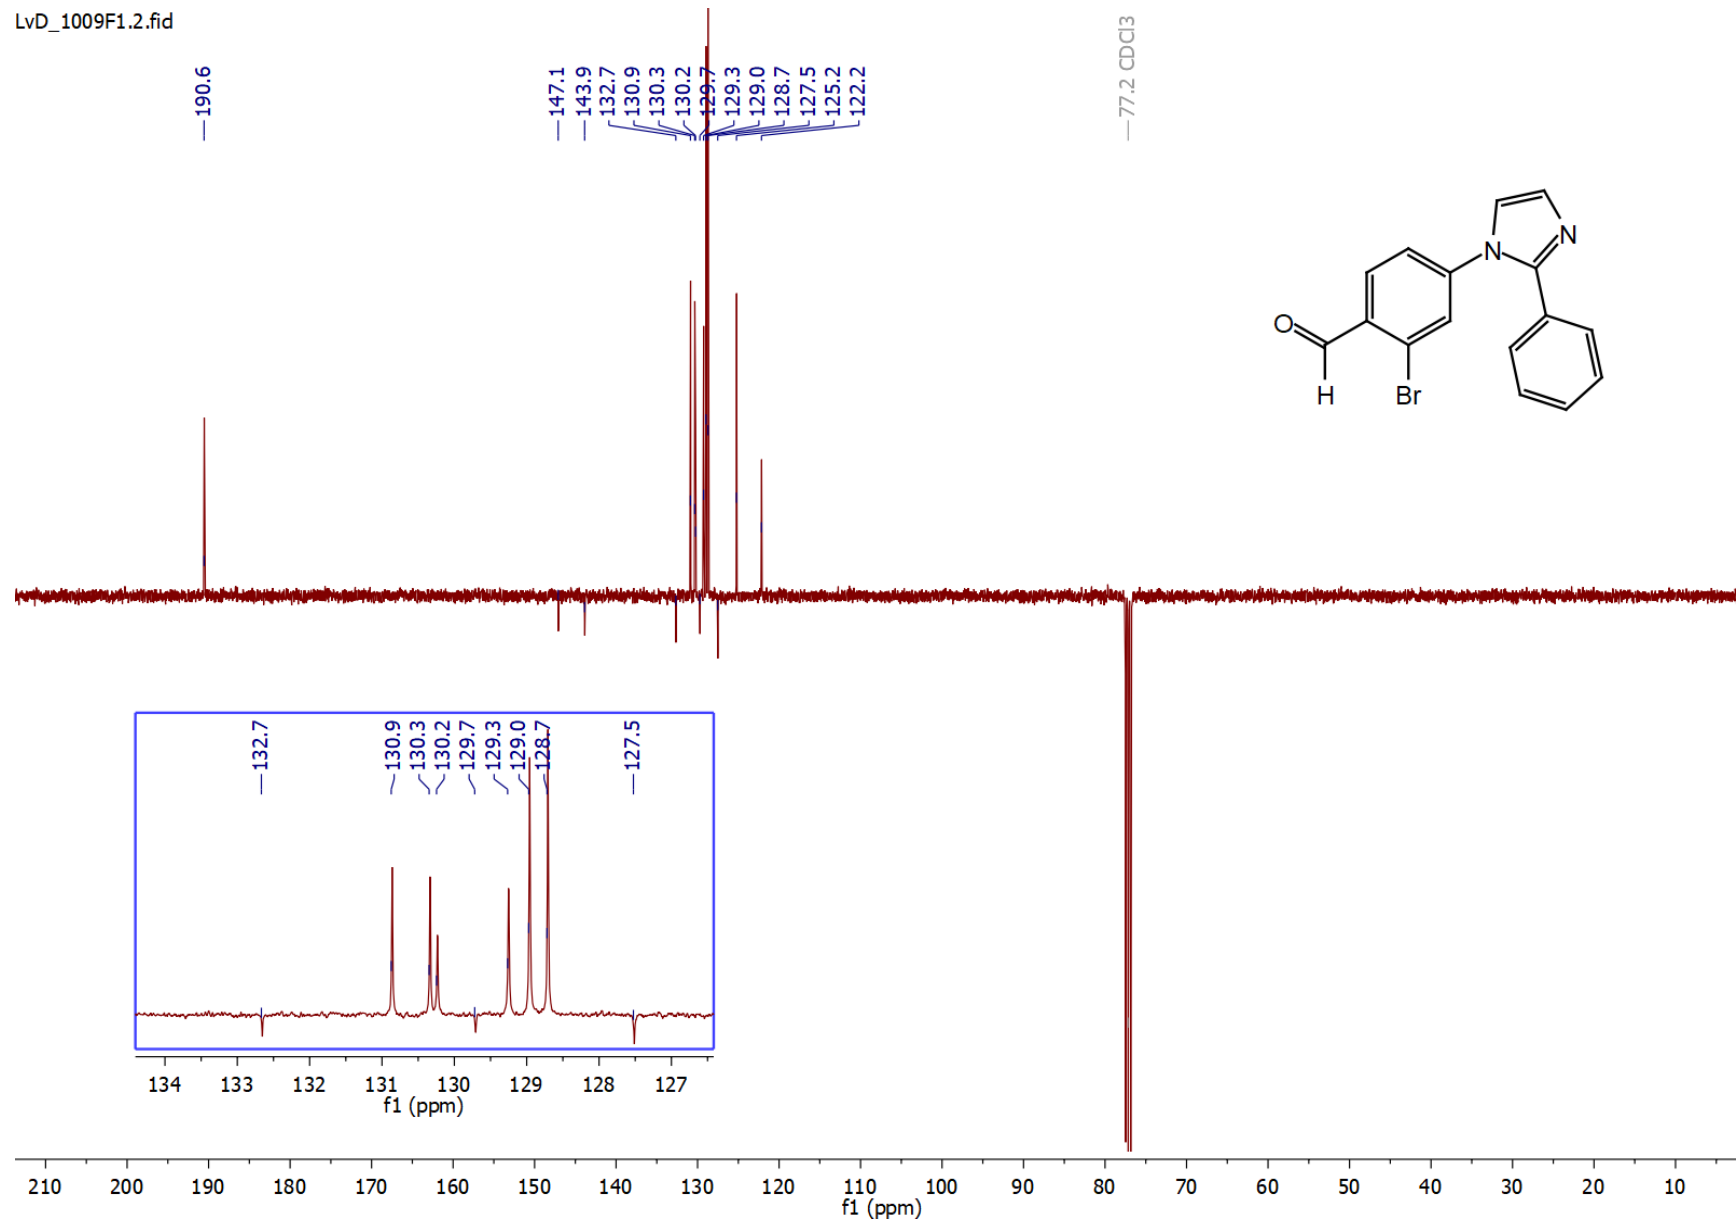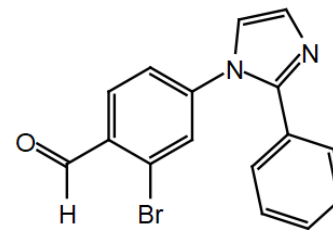



# Fragment 14

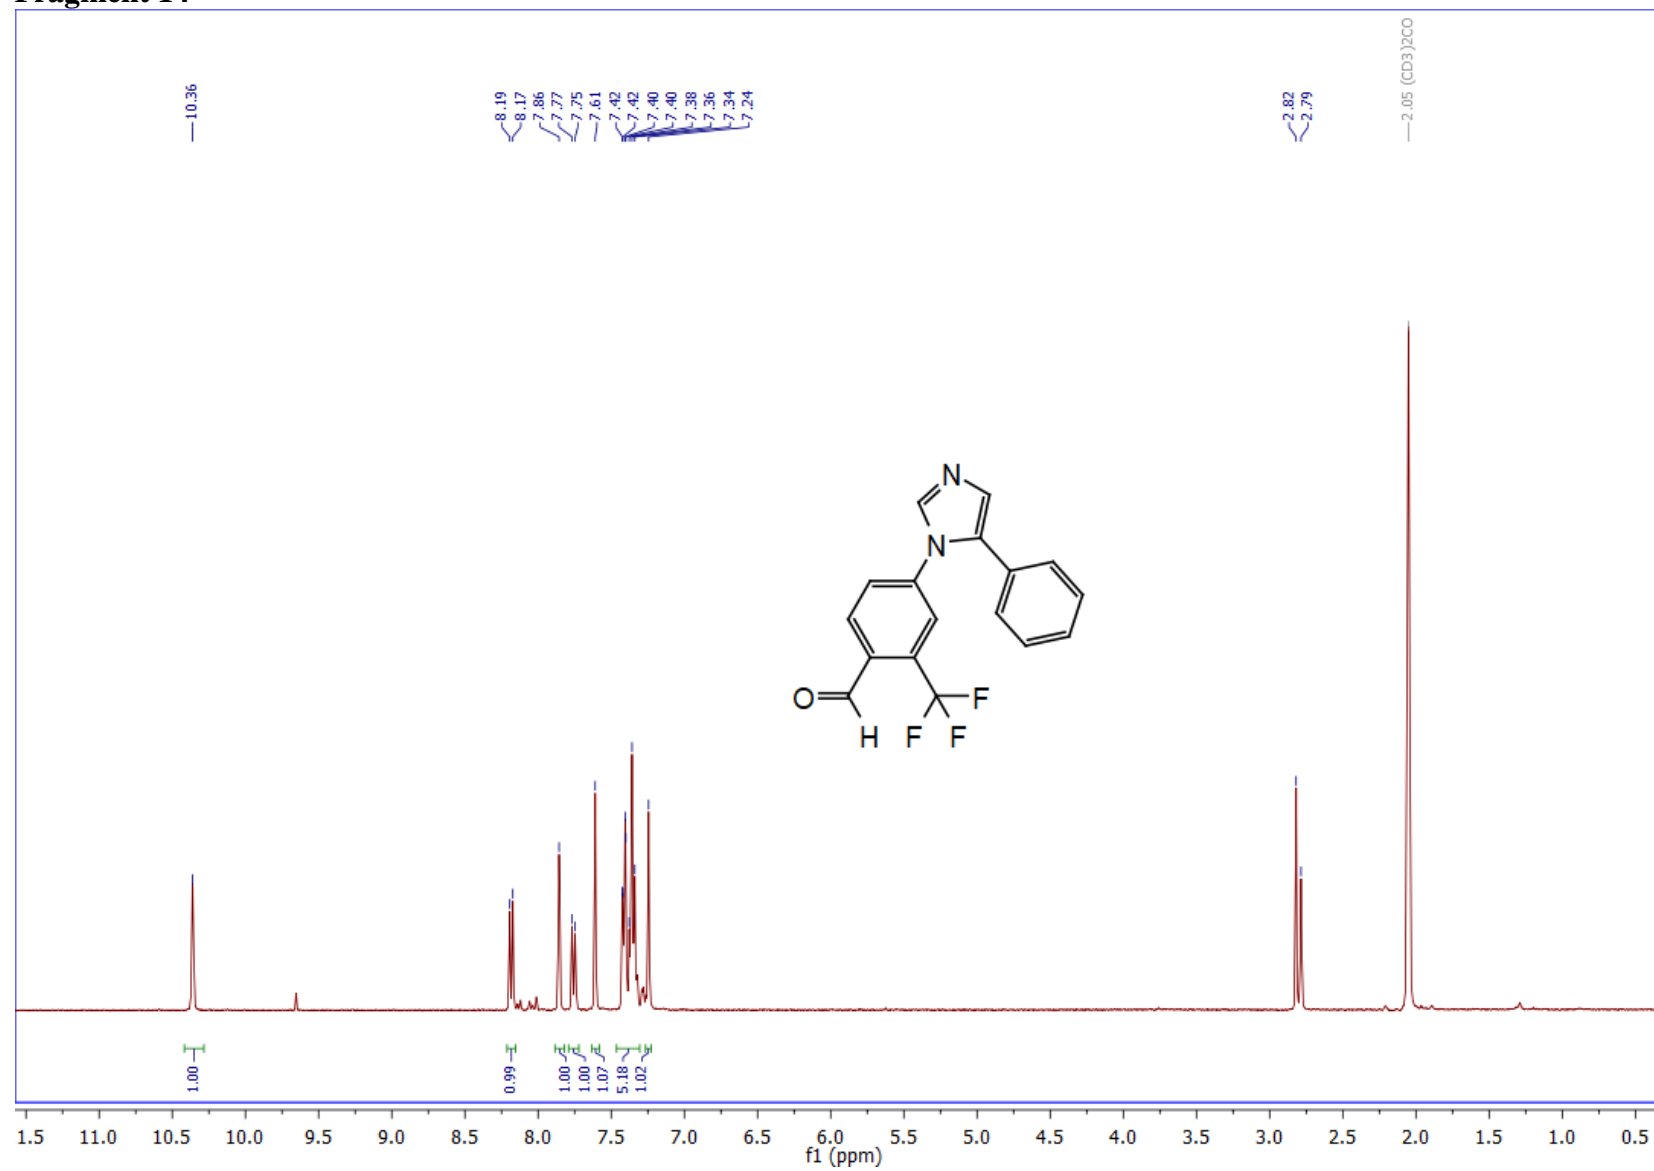

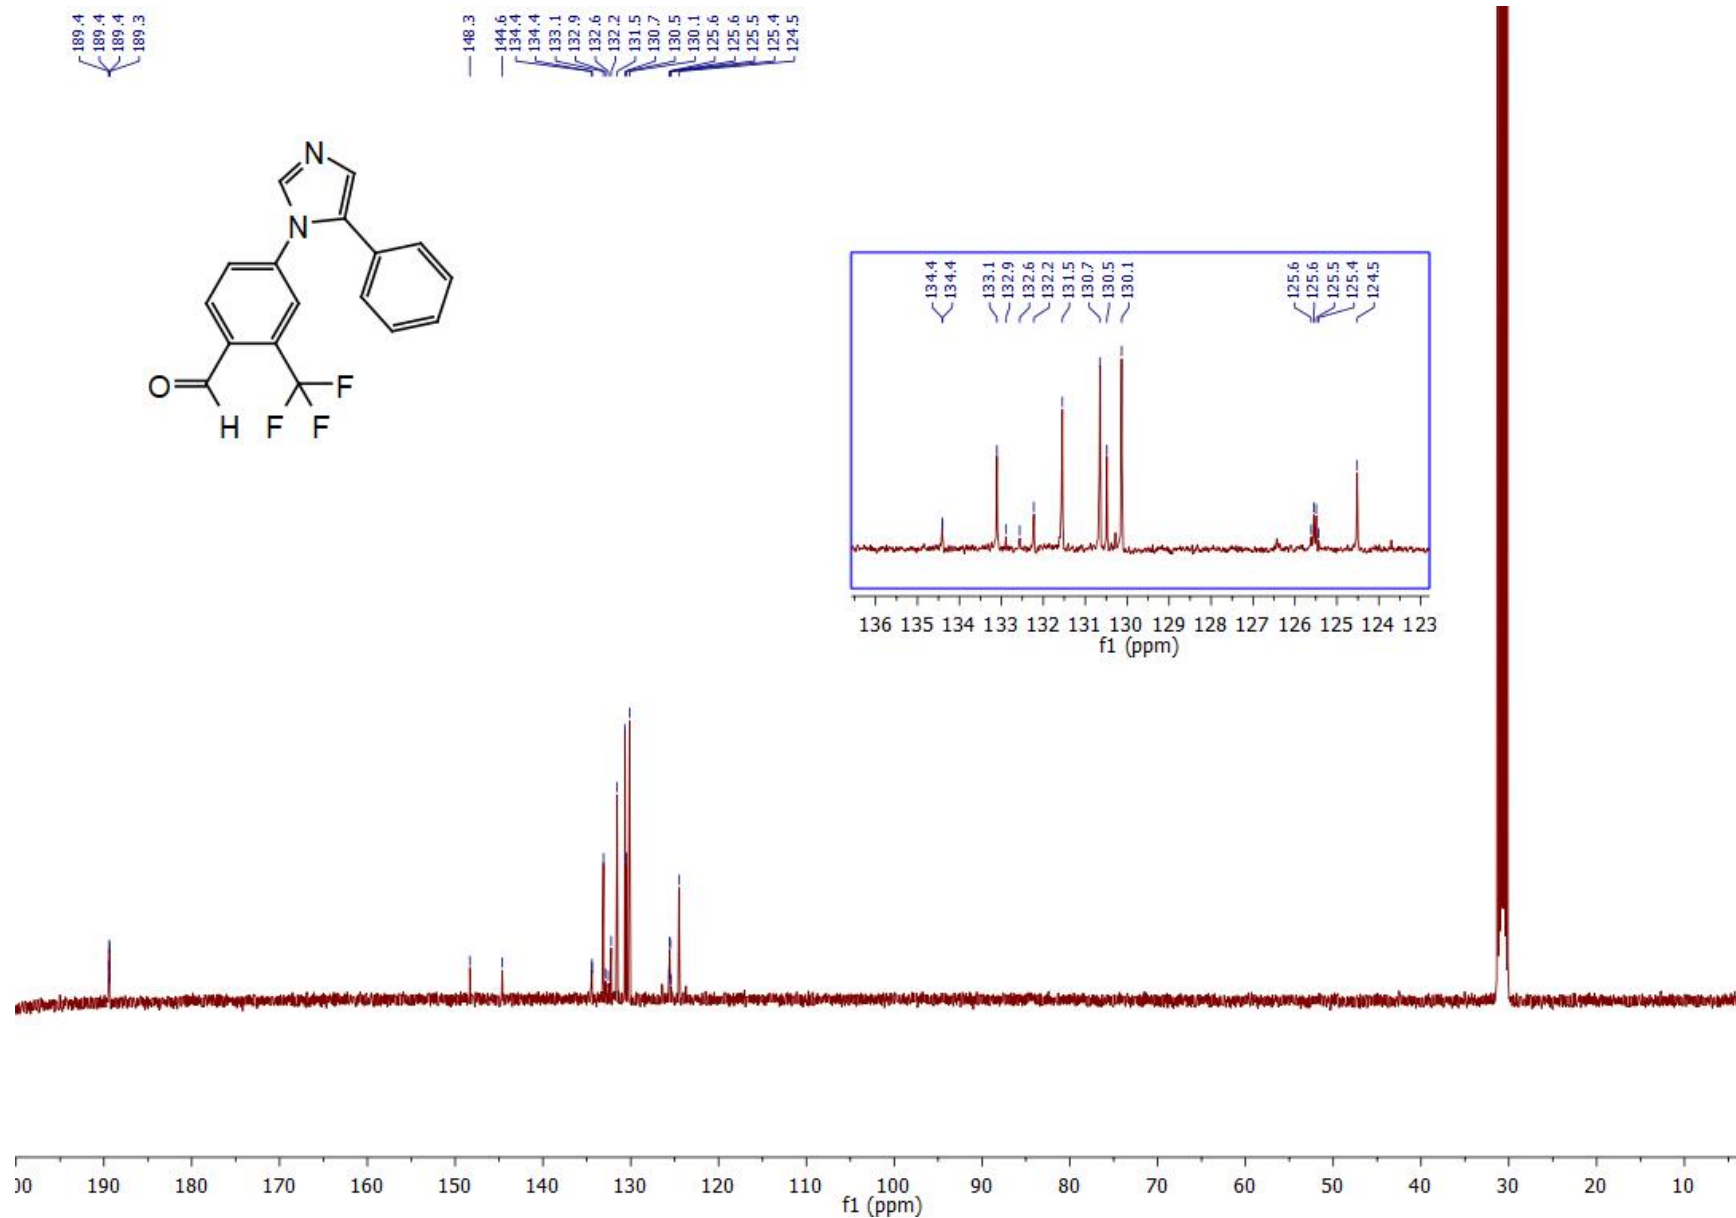

# Fragment 15

LvD1014.1.fid

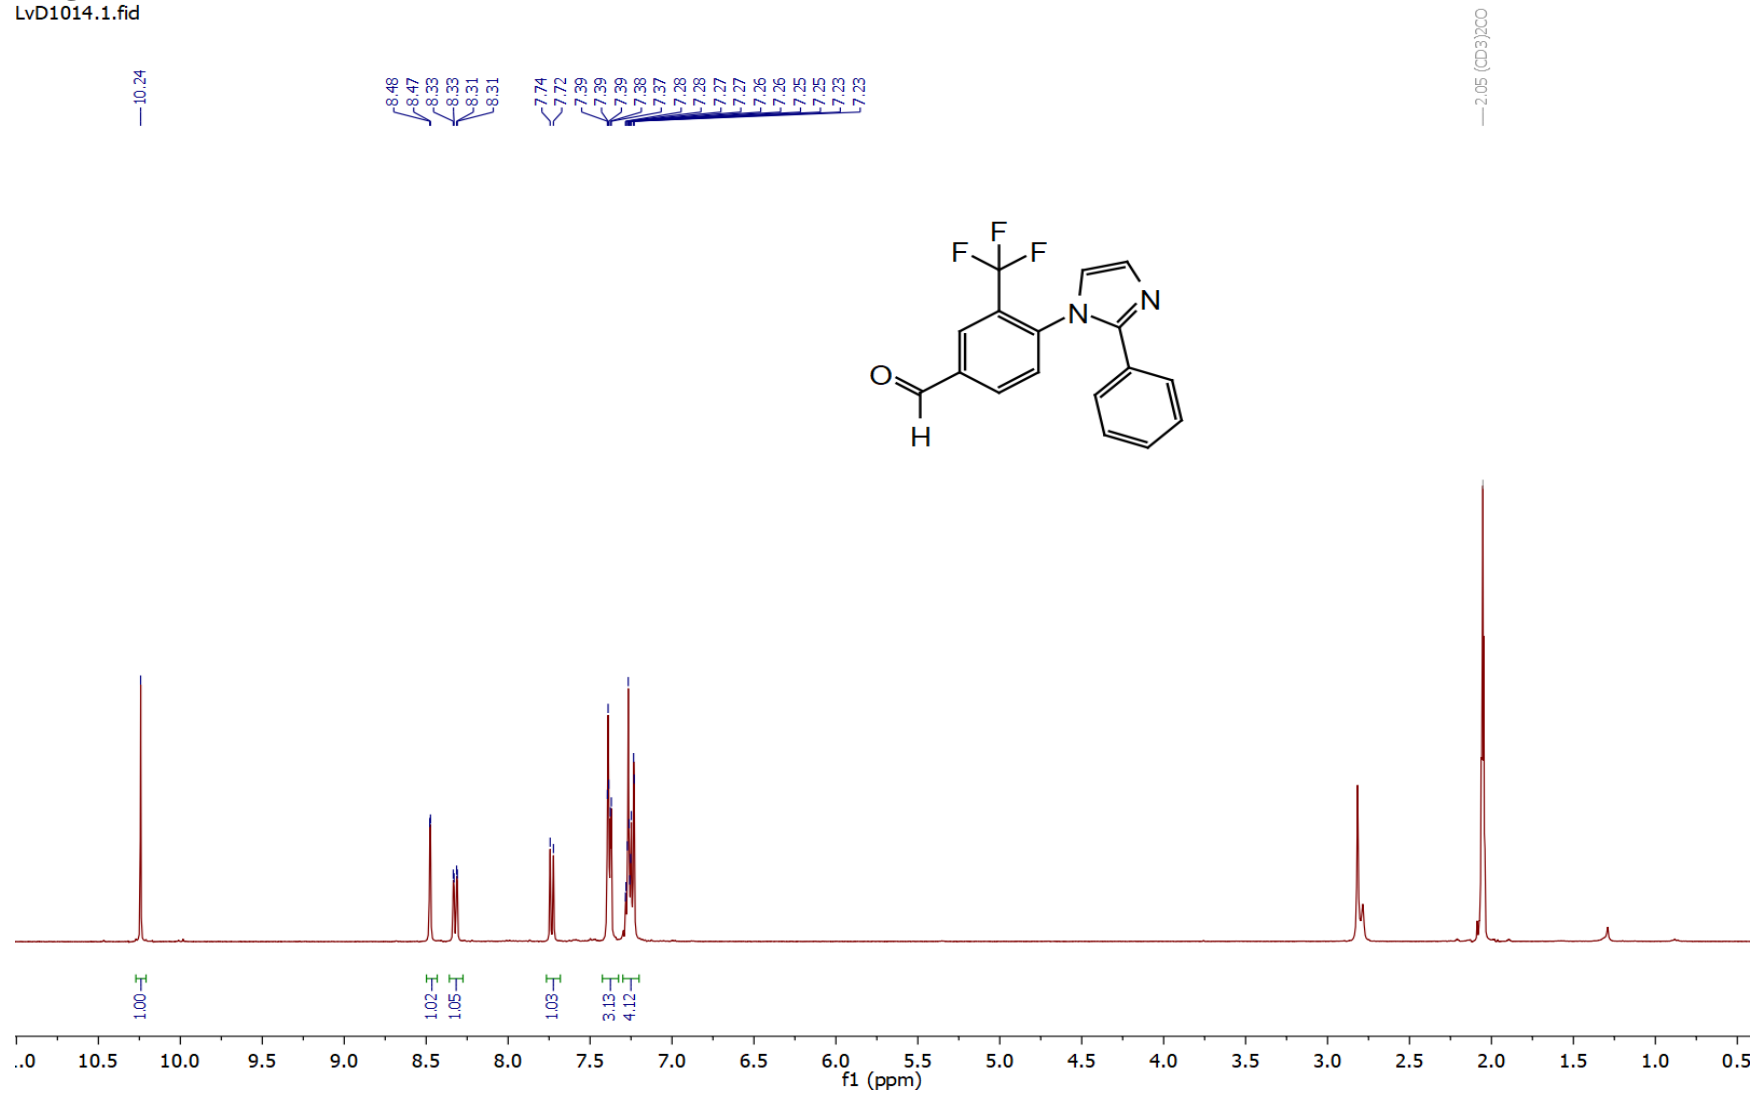

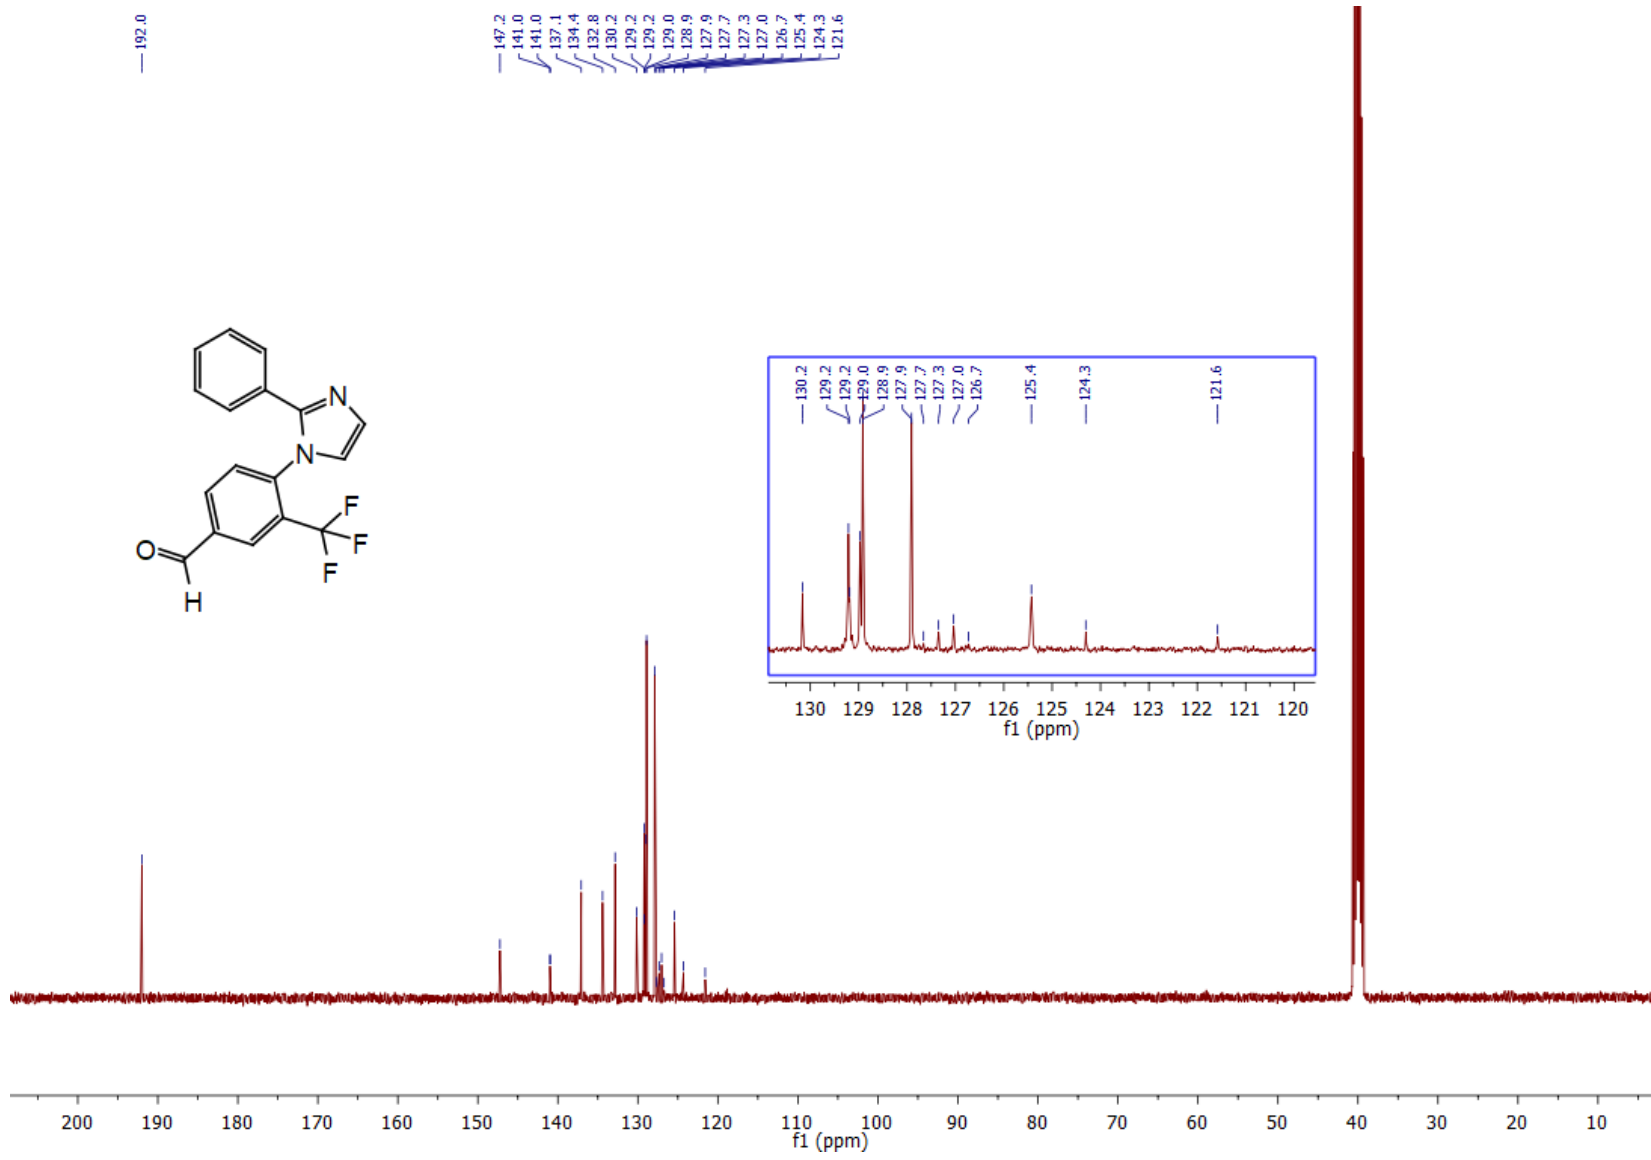

# Fragment 16

LvD1019.1.fid

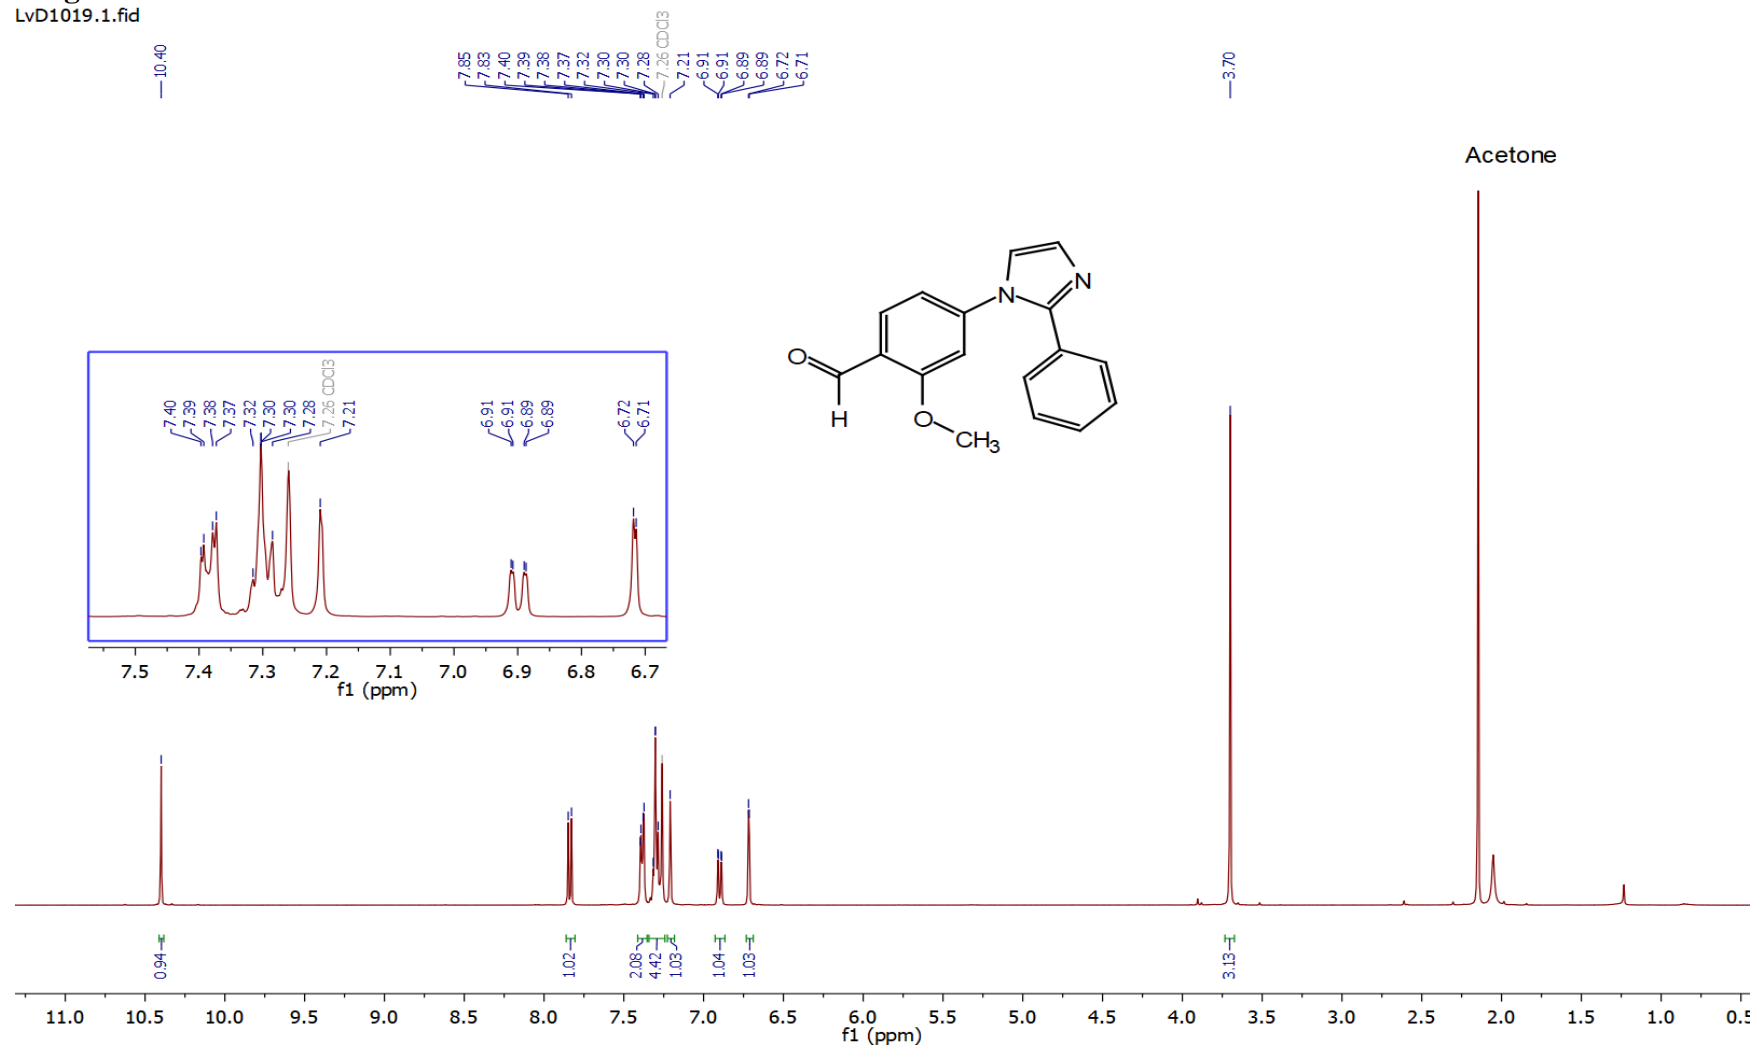

LvD1019.2.fid

188.6  
162.2  
146.9  
144.6  
130.1  
130.0  
129.7  
128.9  
128.5  
124.0  
122.2  
117.6  
109.5

77.2 CDCl3

56.0

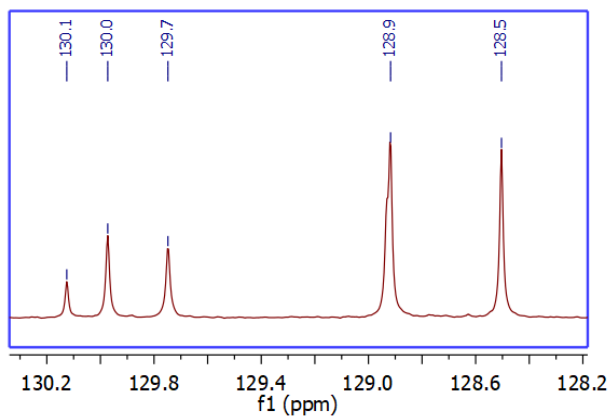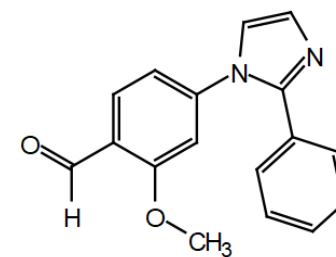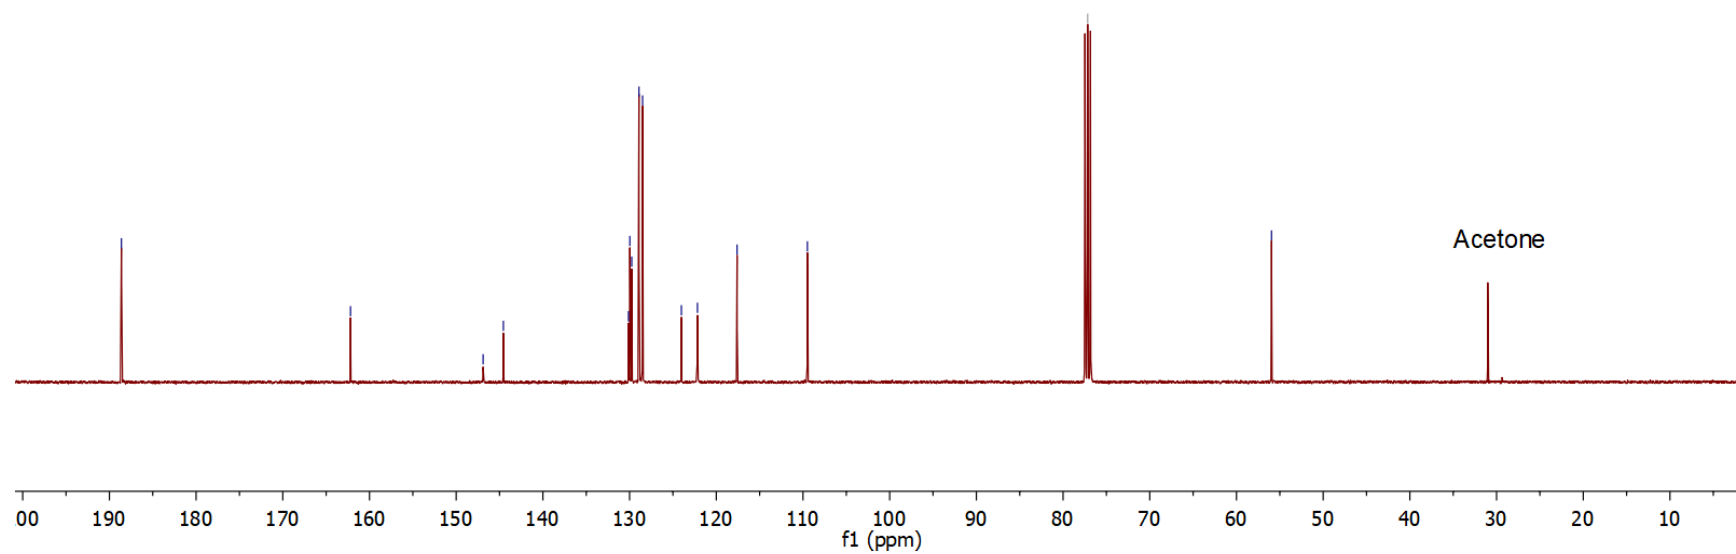

# Fragment 17

LvD1012.1.fid

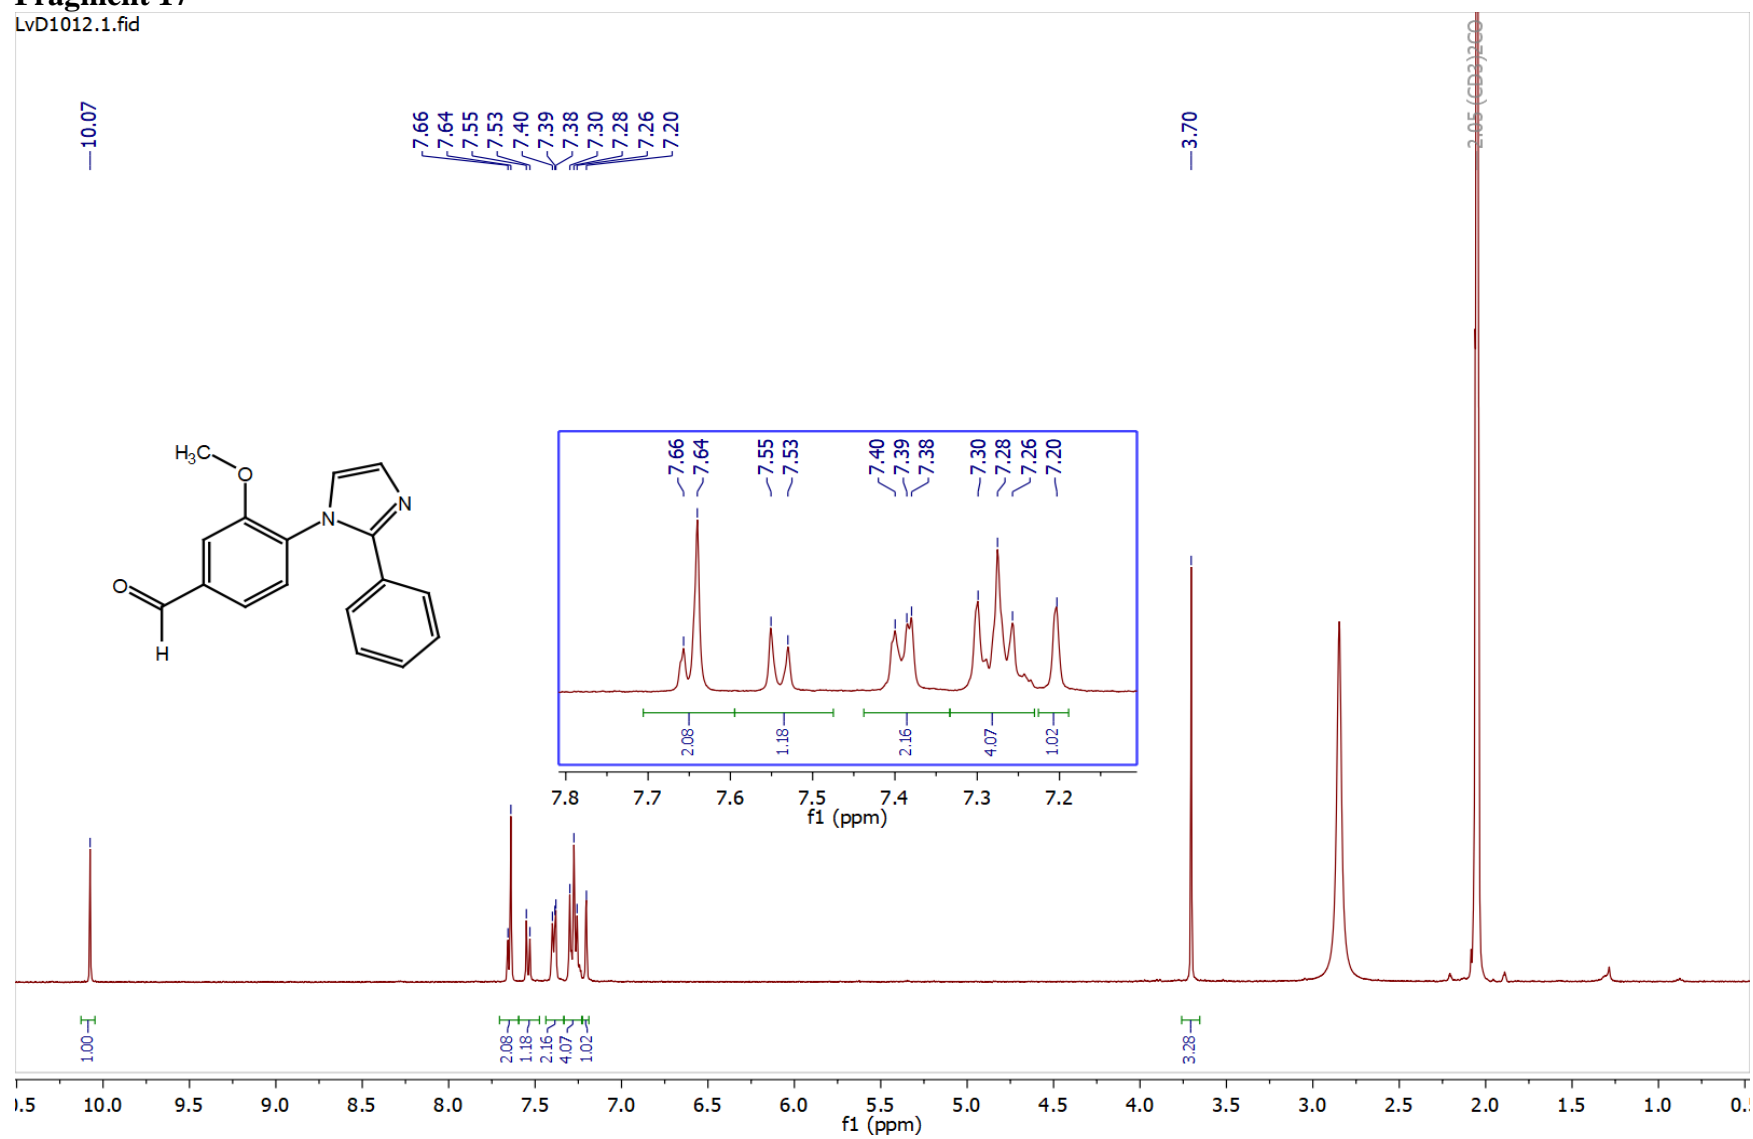

LvD1012\_7Feb.2.fid

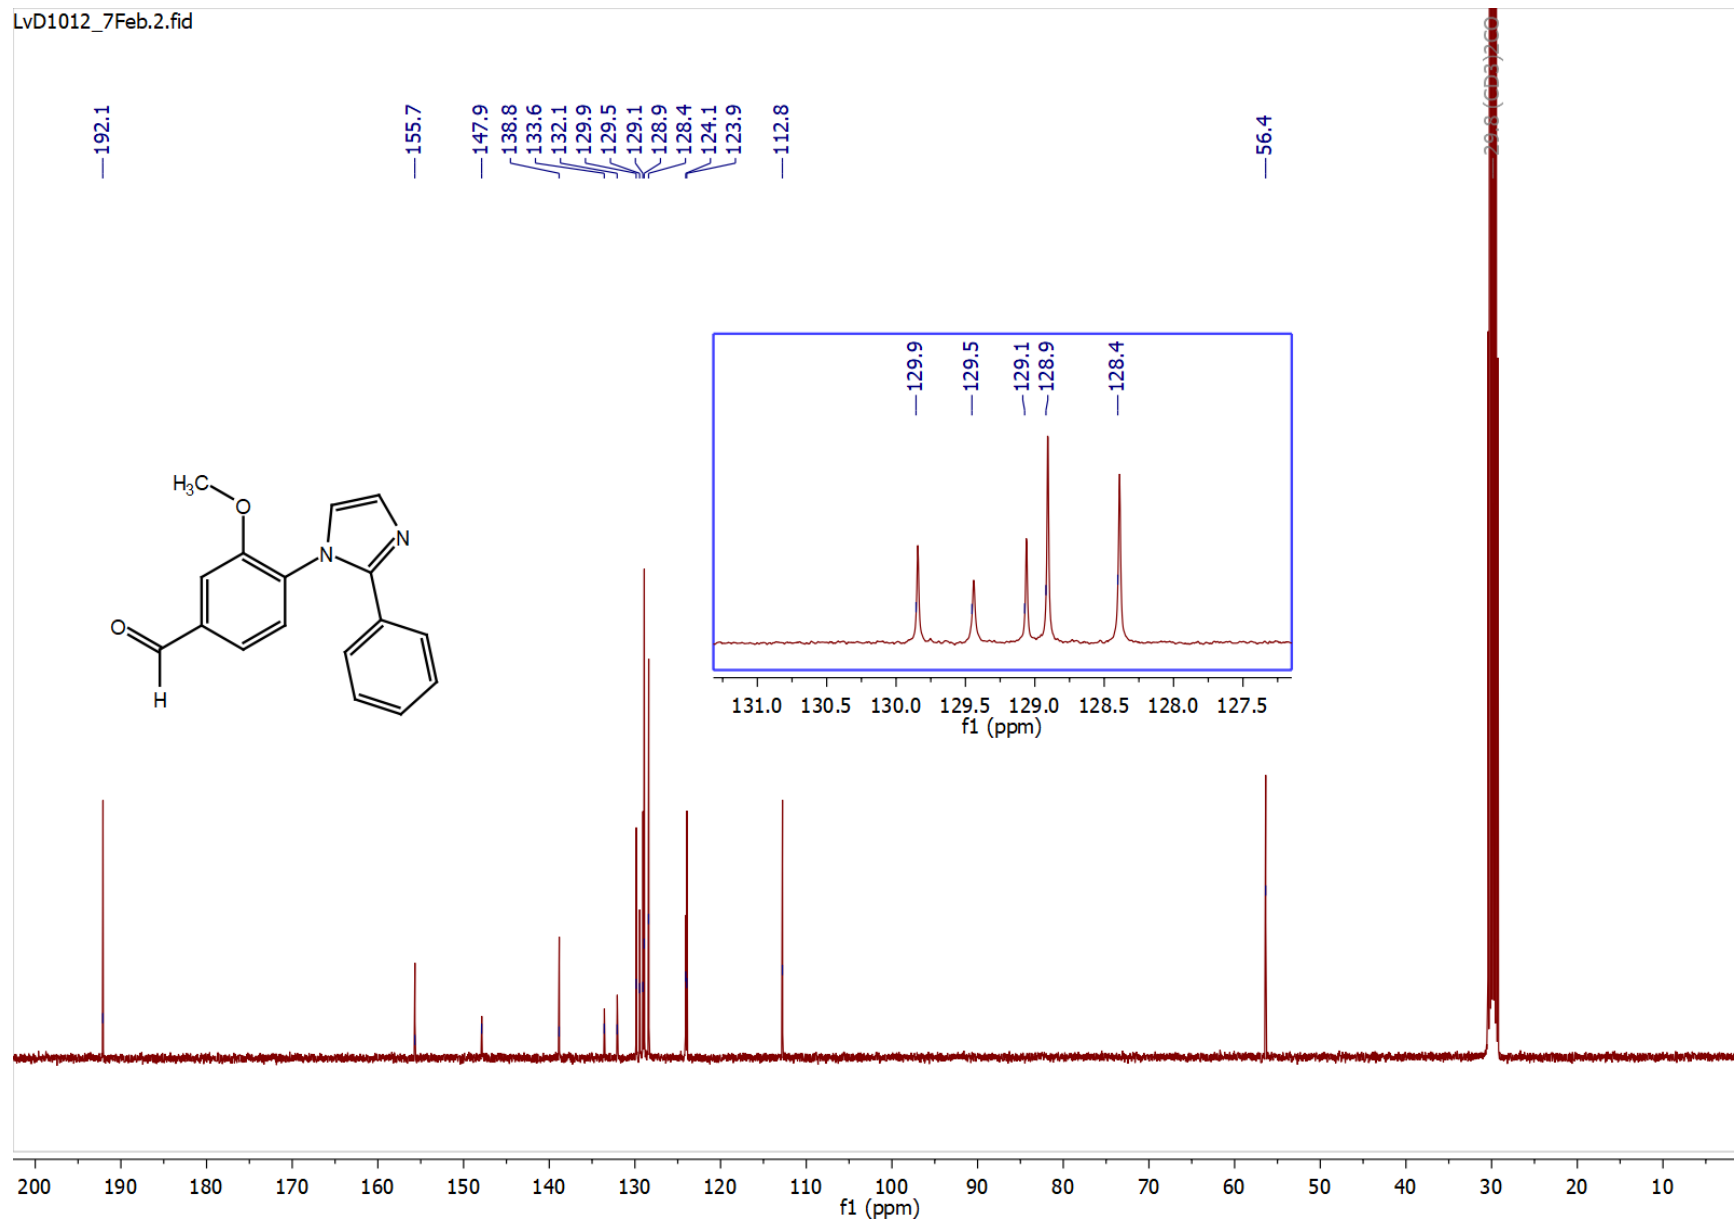



# Fragment 18

LvD1016.1.fid

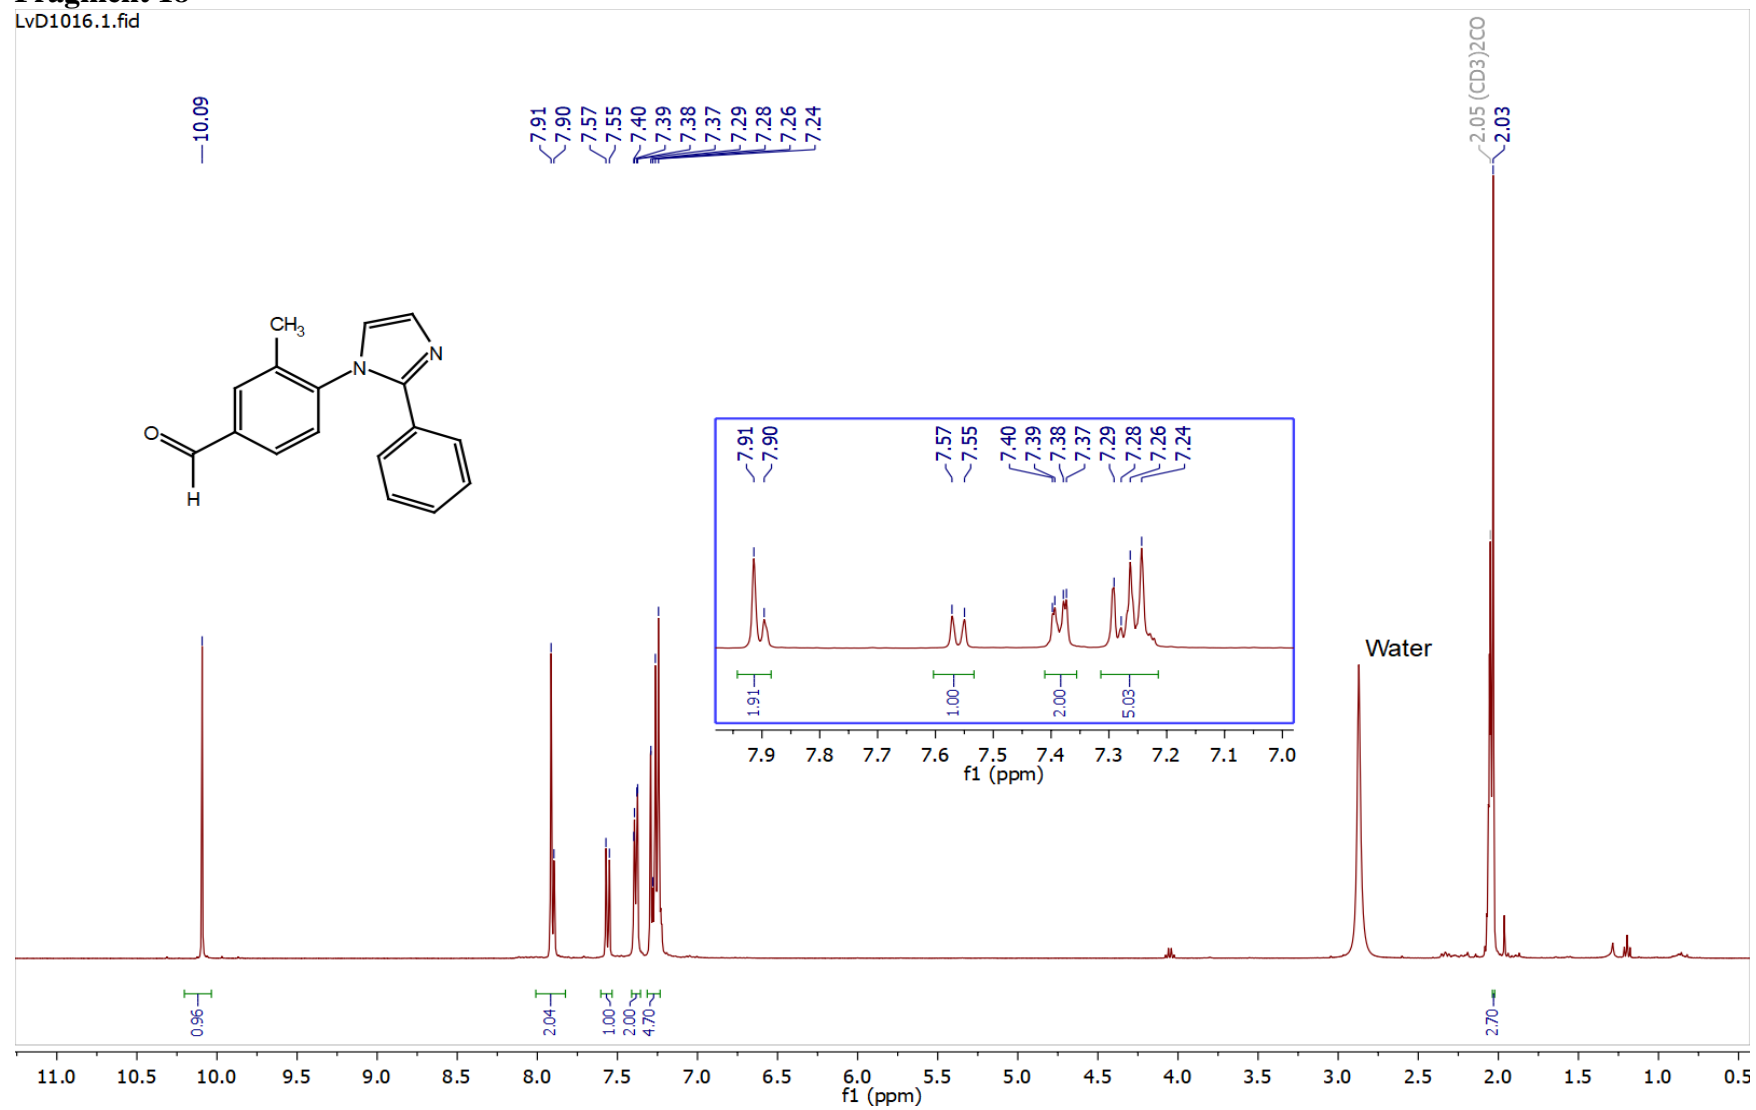

LvD1016\_Feb14.2.fid

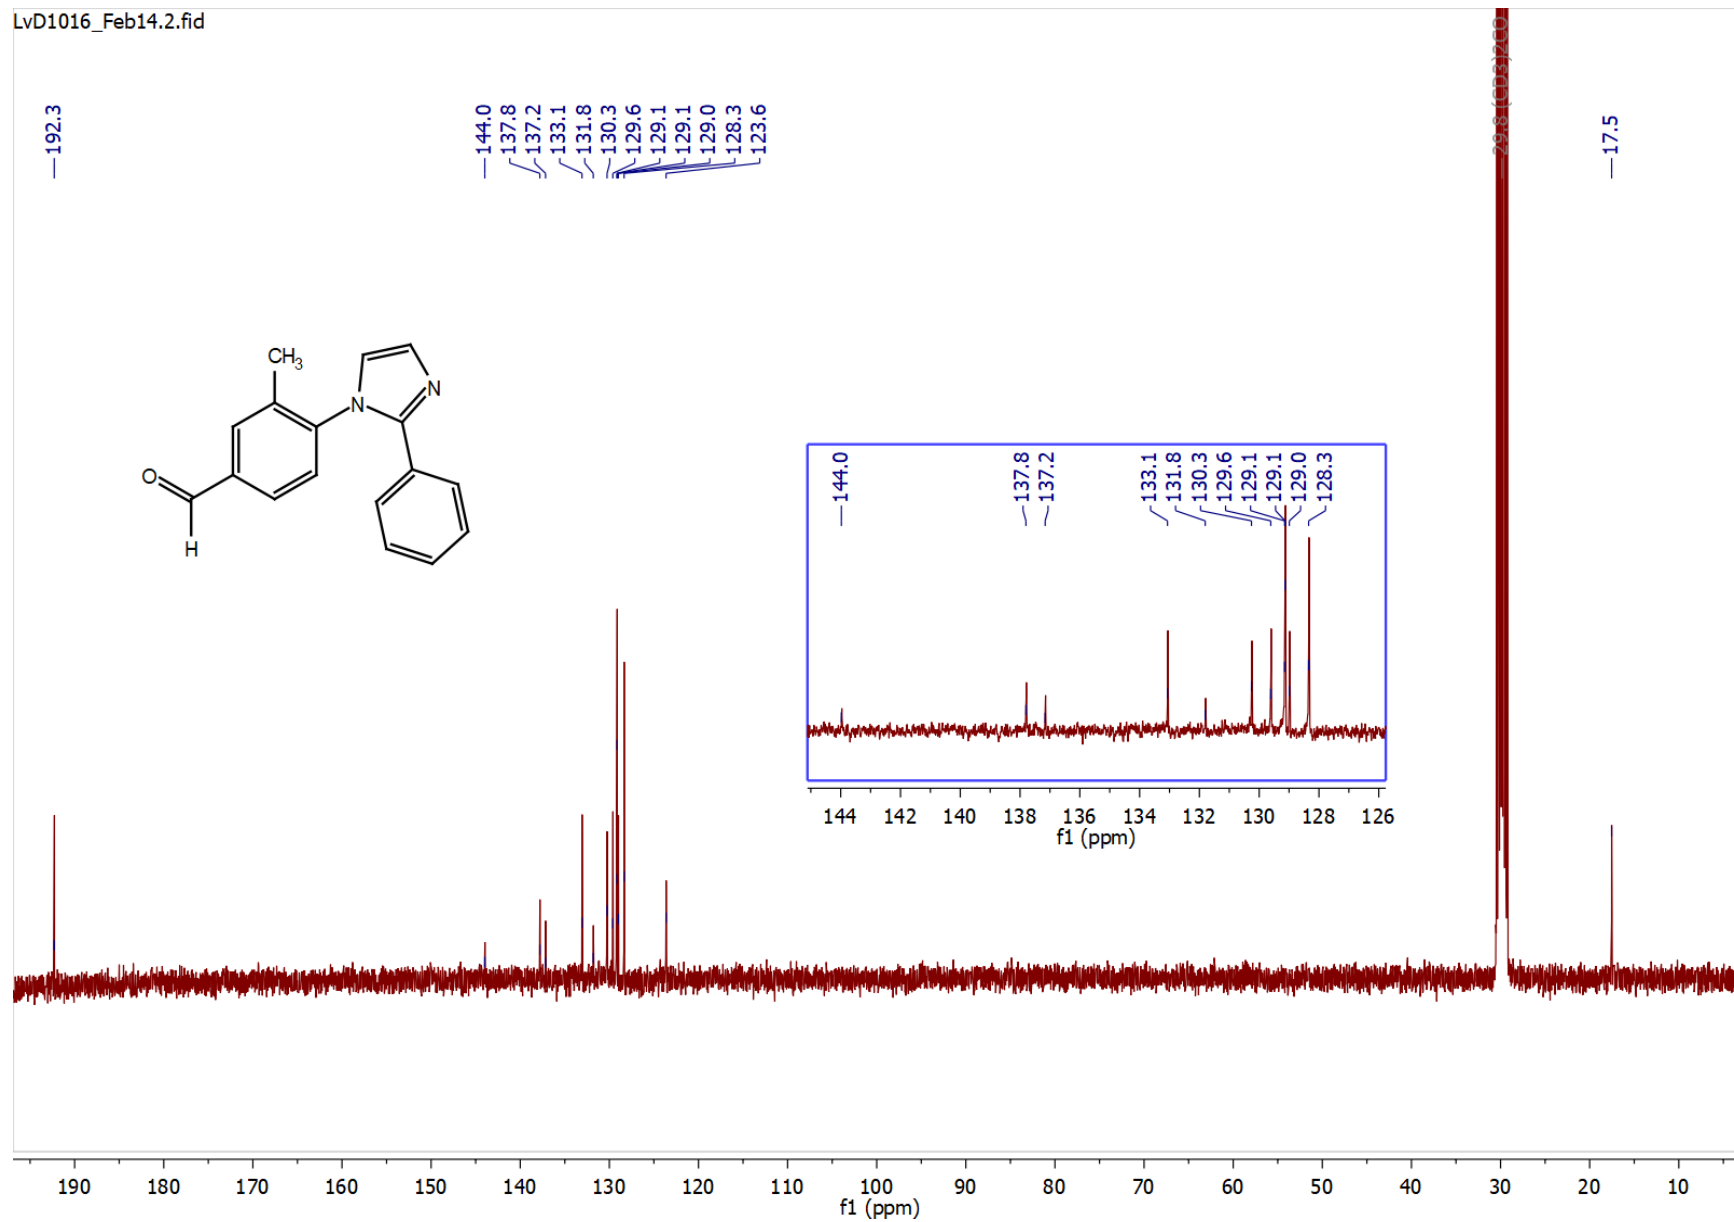

# Fragment 19

LvD1032.10.fid

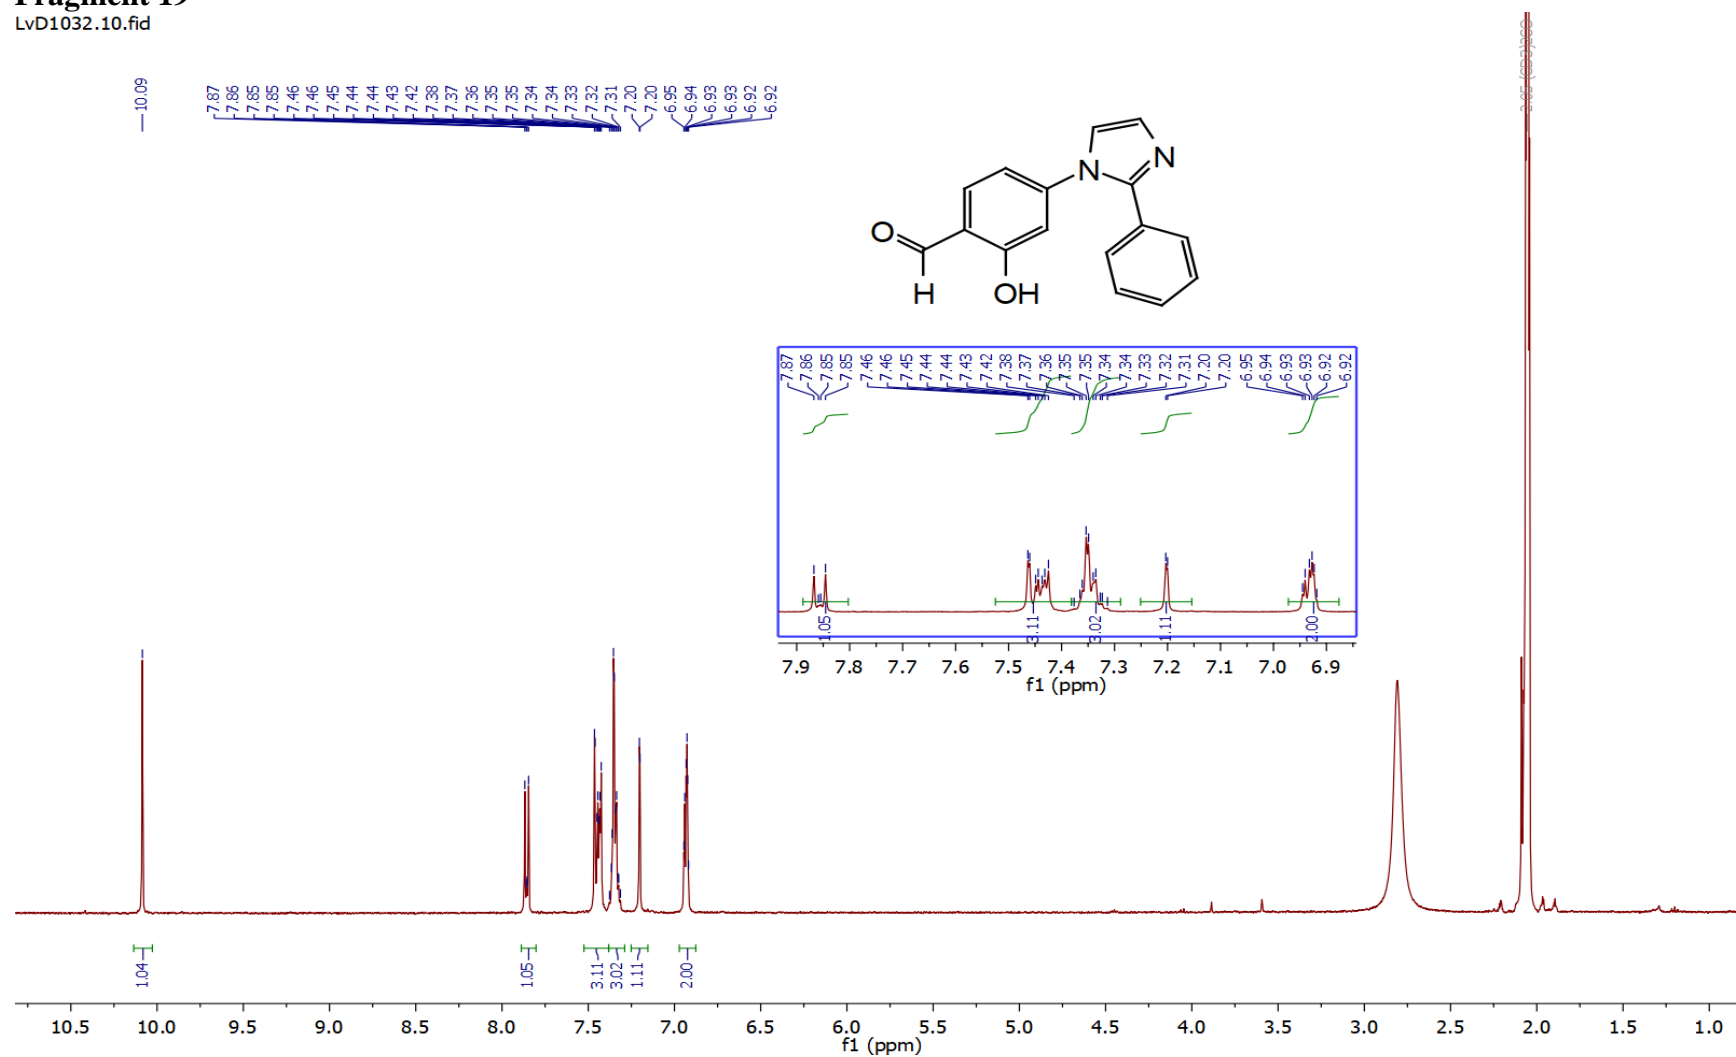

LvD1032.11.fid

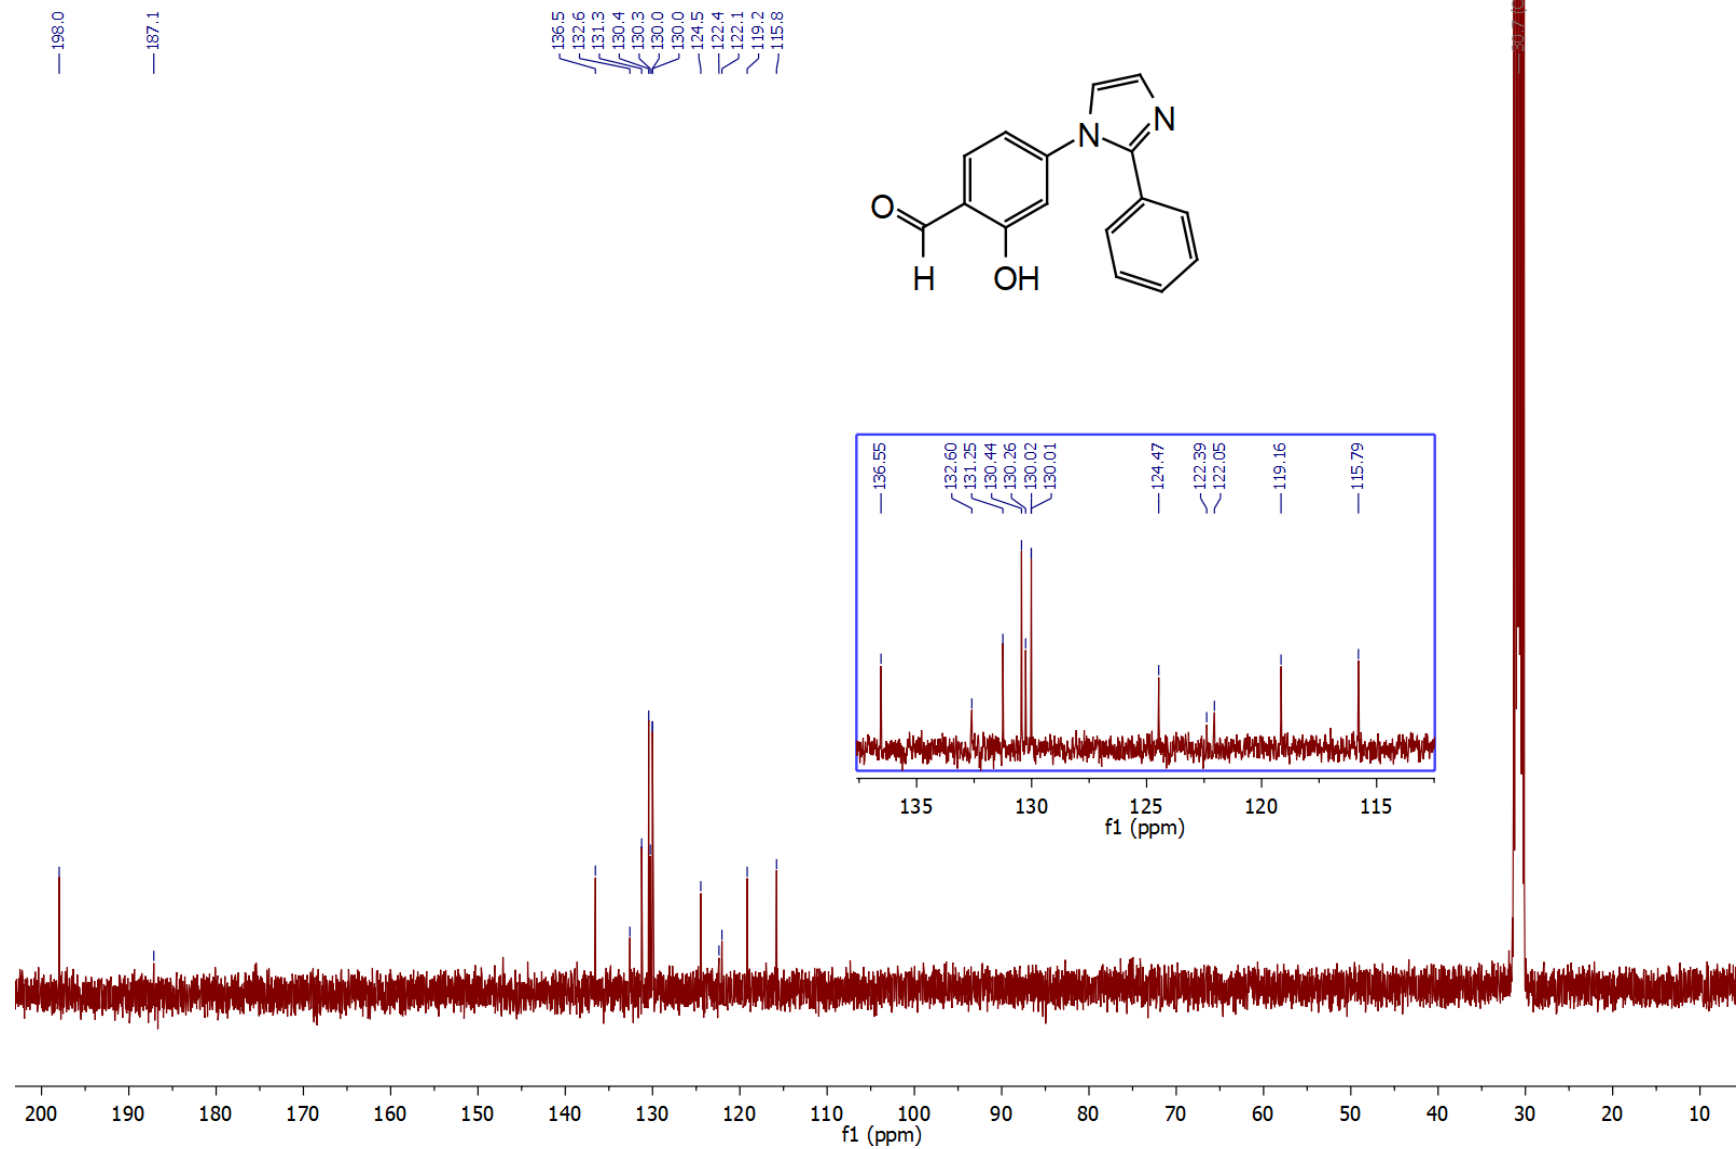

# Fragment 20

LvD1021.1.fid

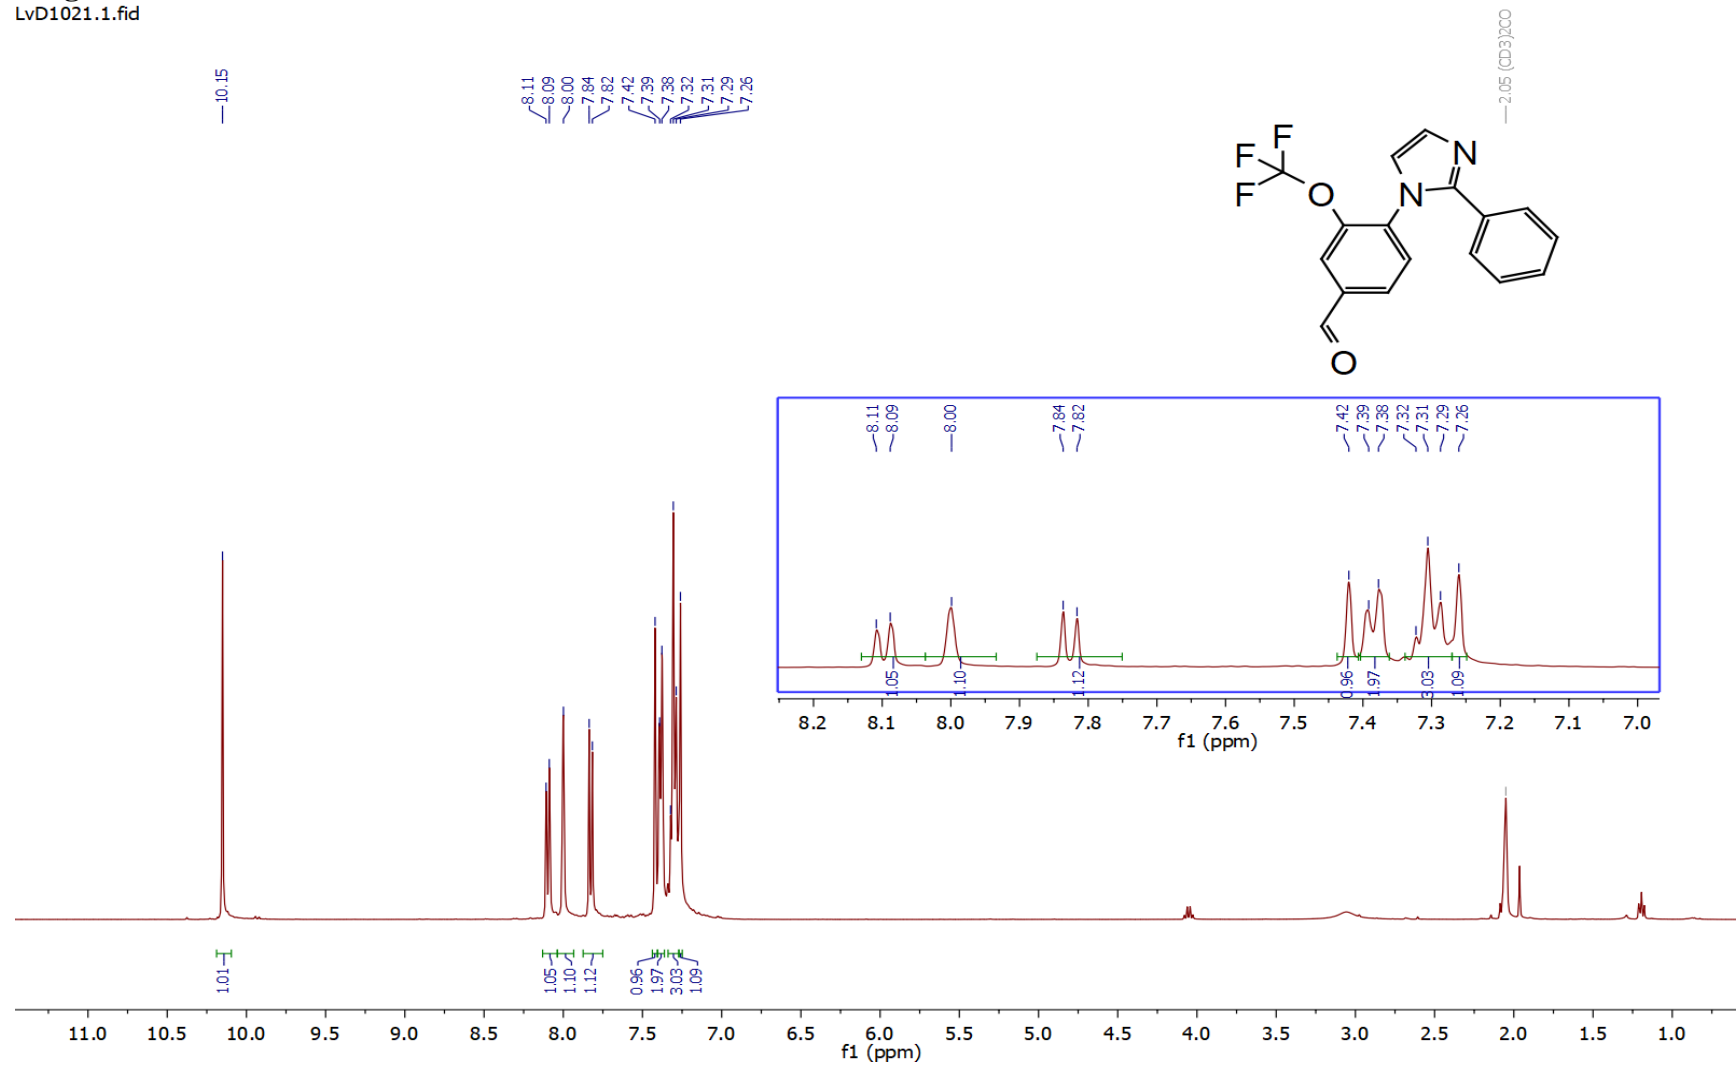

LvD1021.2.fid

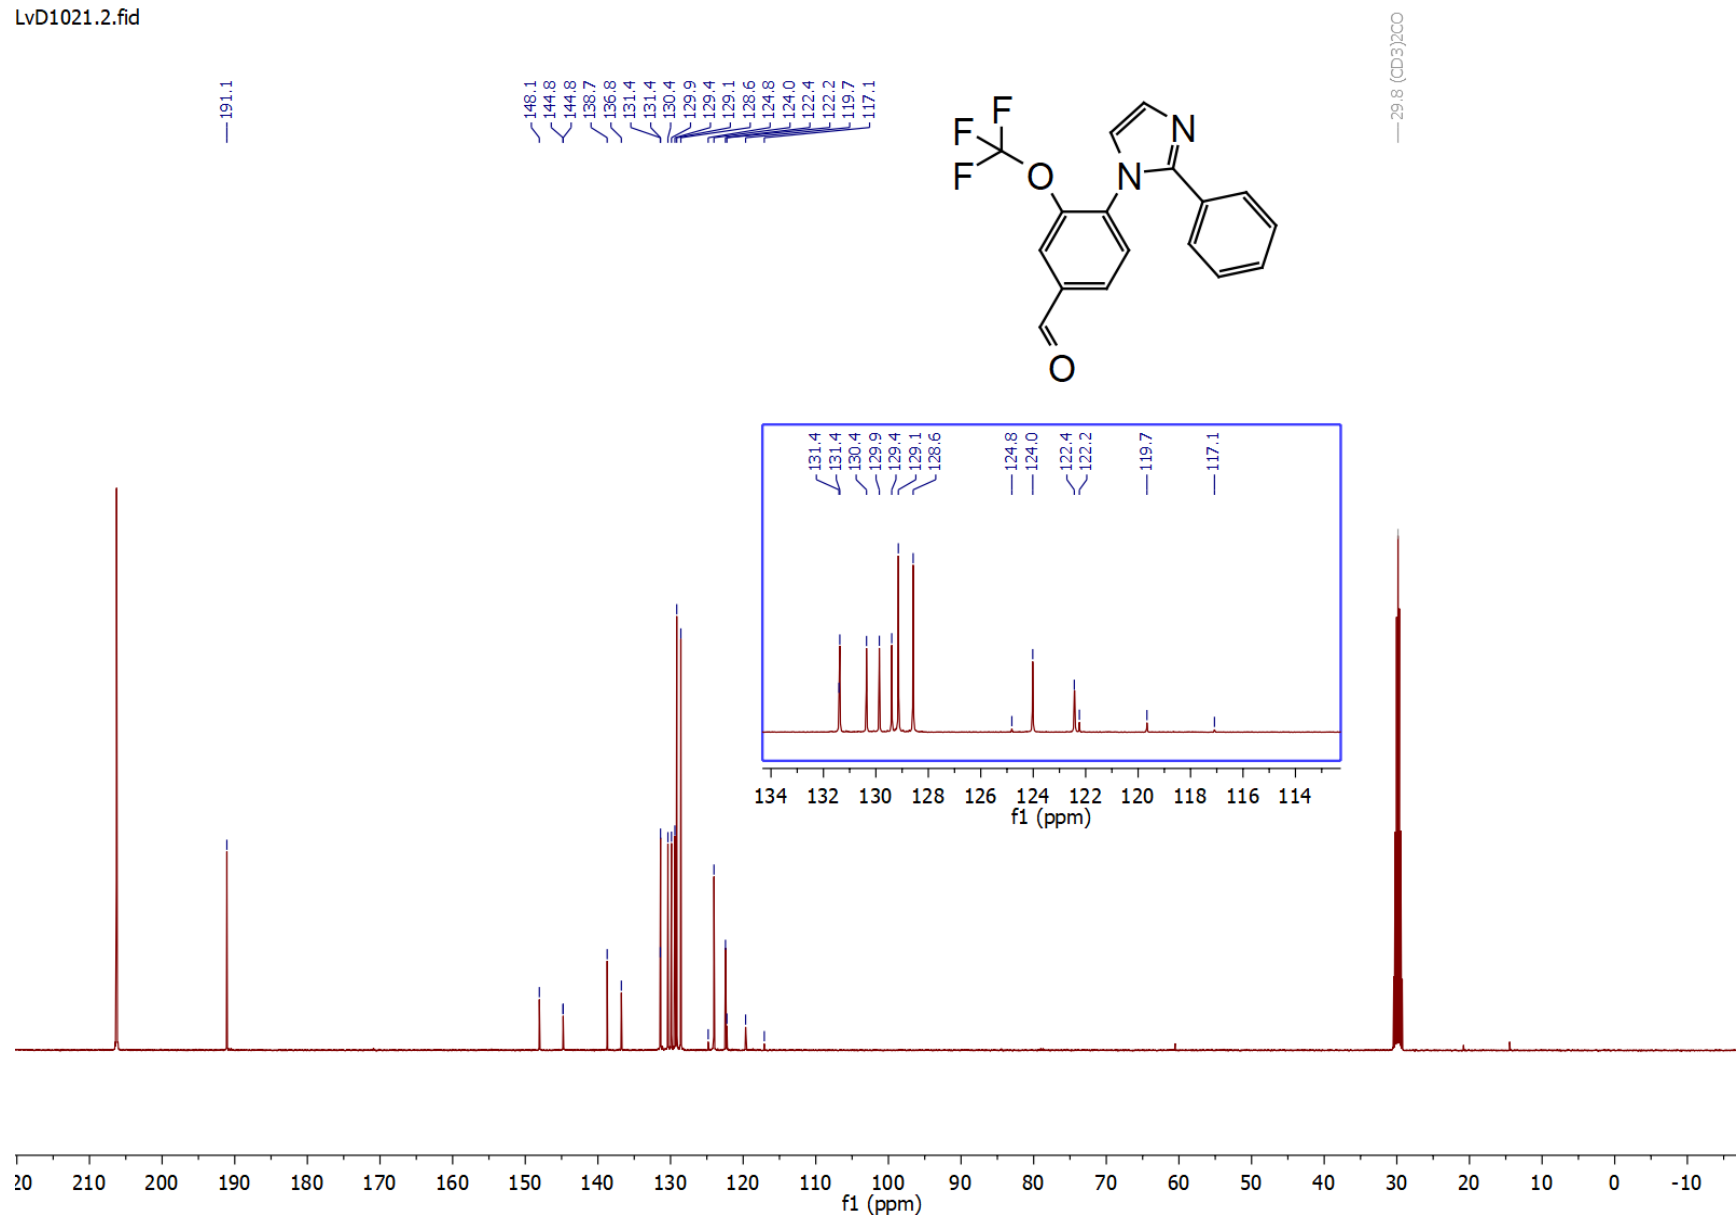

# Fragment 21

LvD1020.1.fid

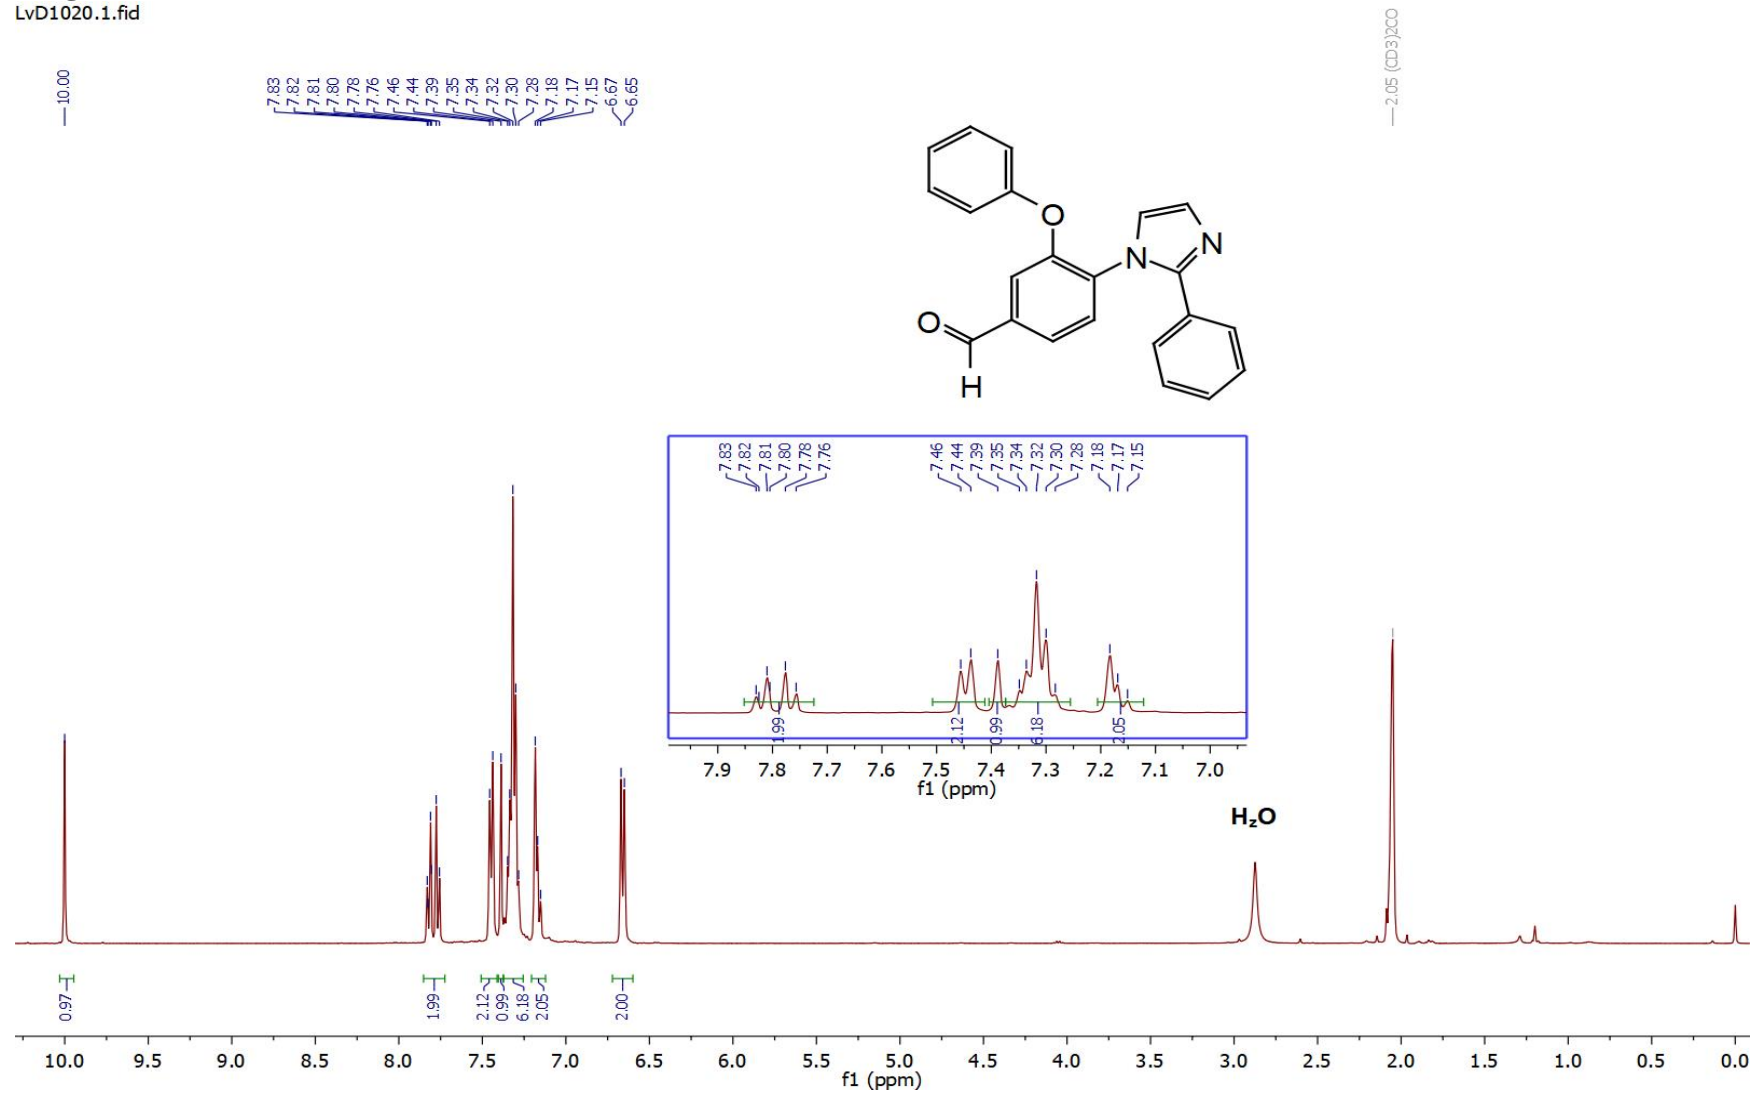

LvD1020.2.fid

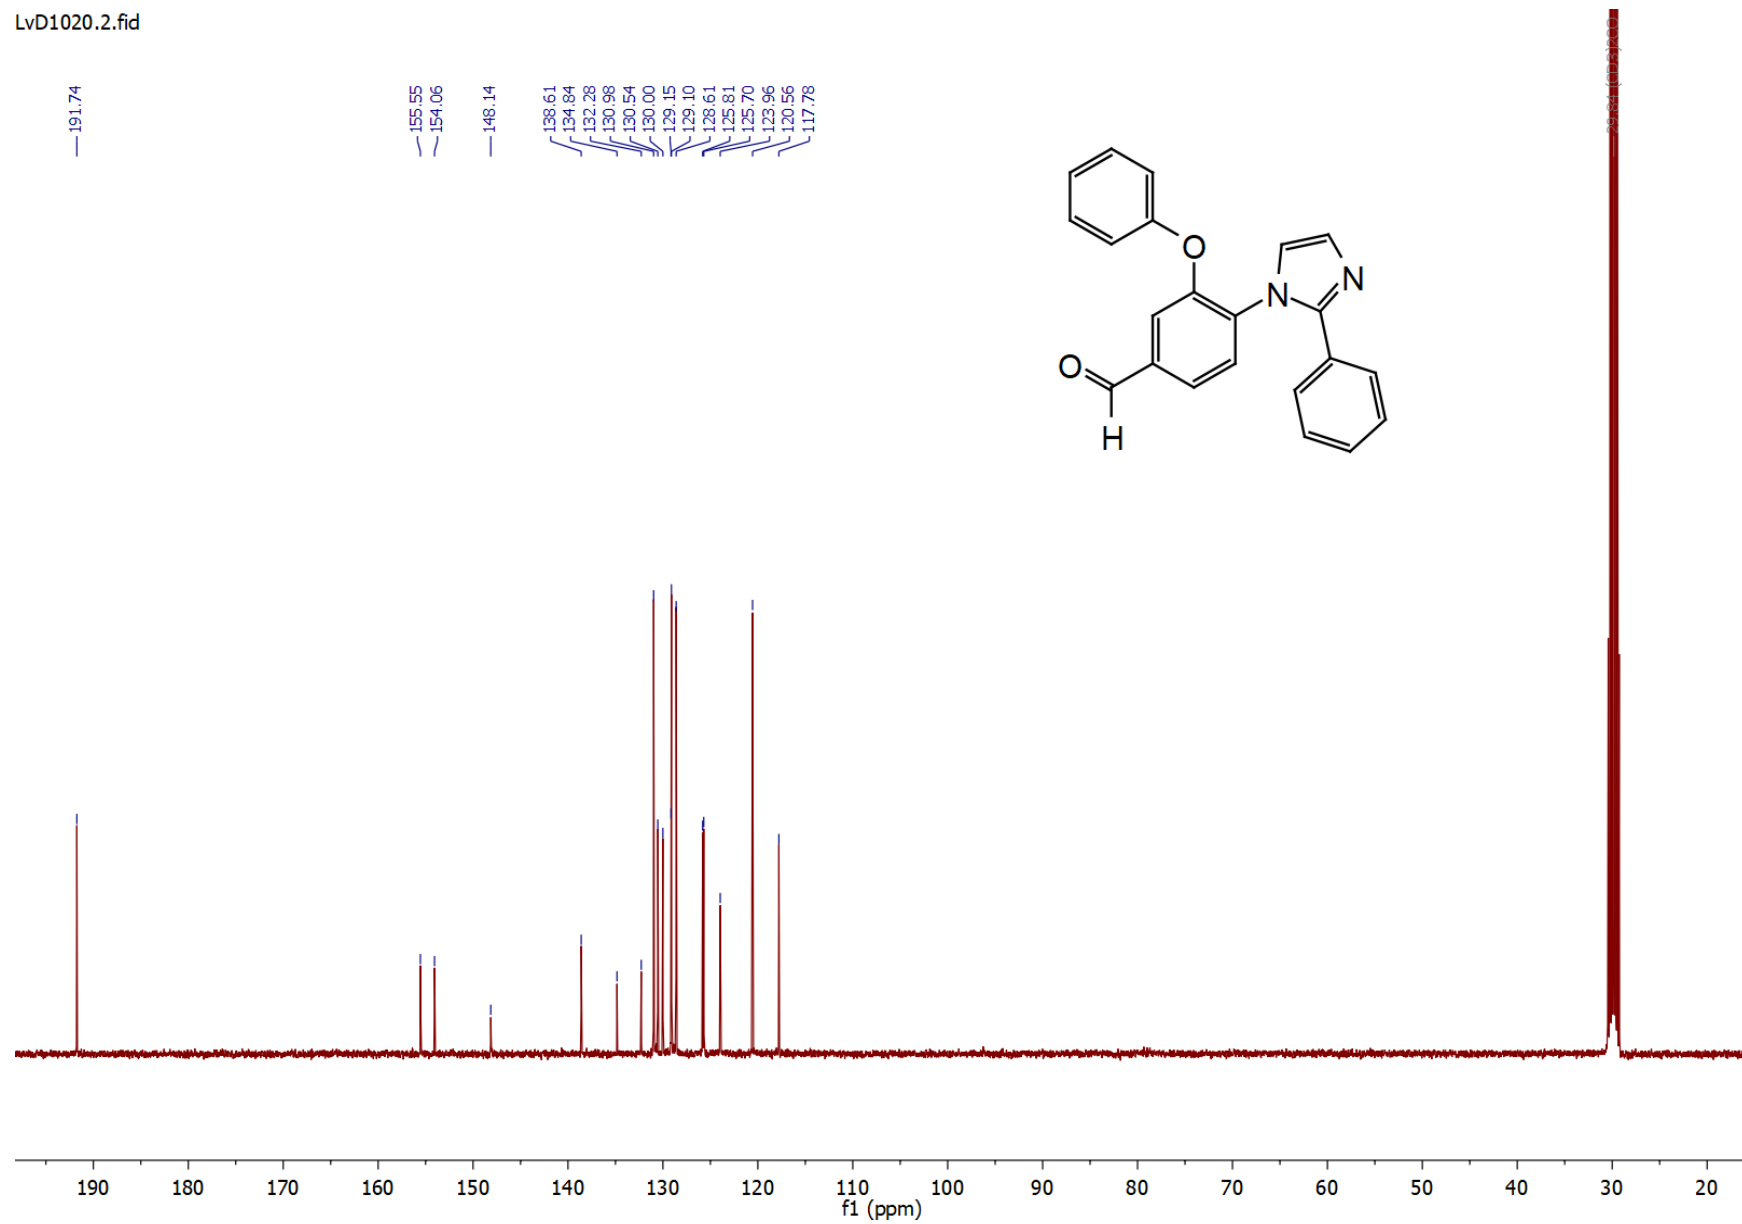



# Fragment 22

LvD1011.1.fid

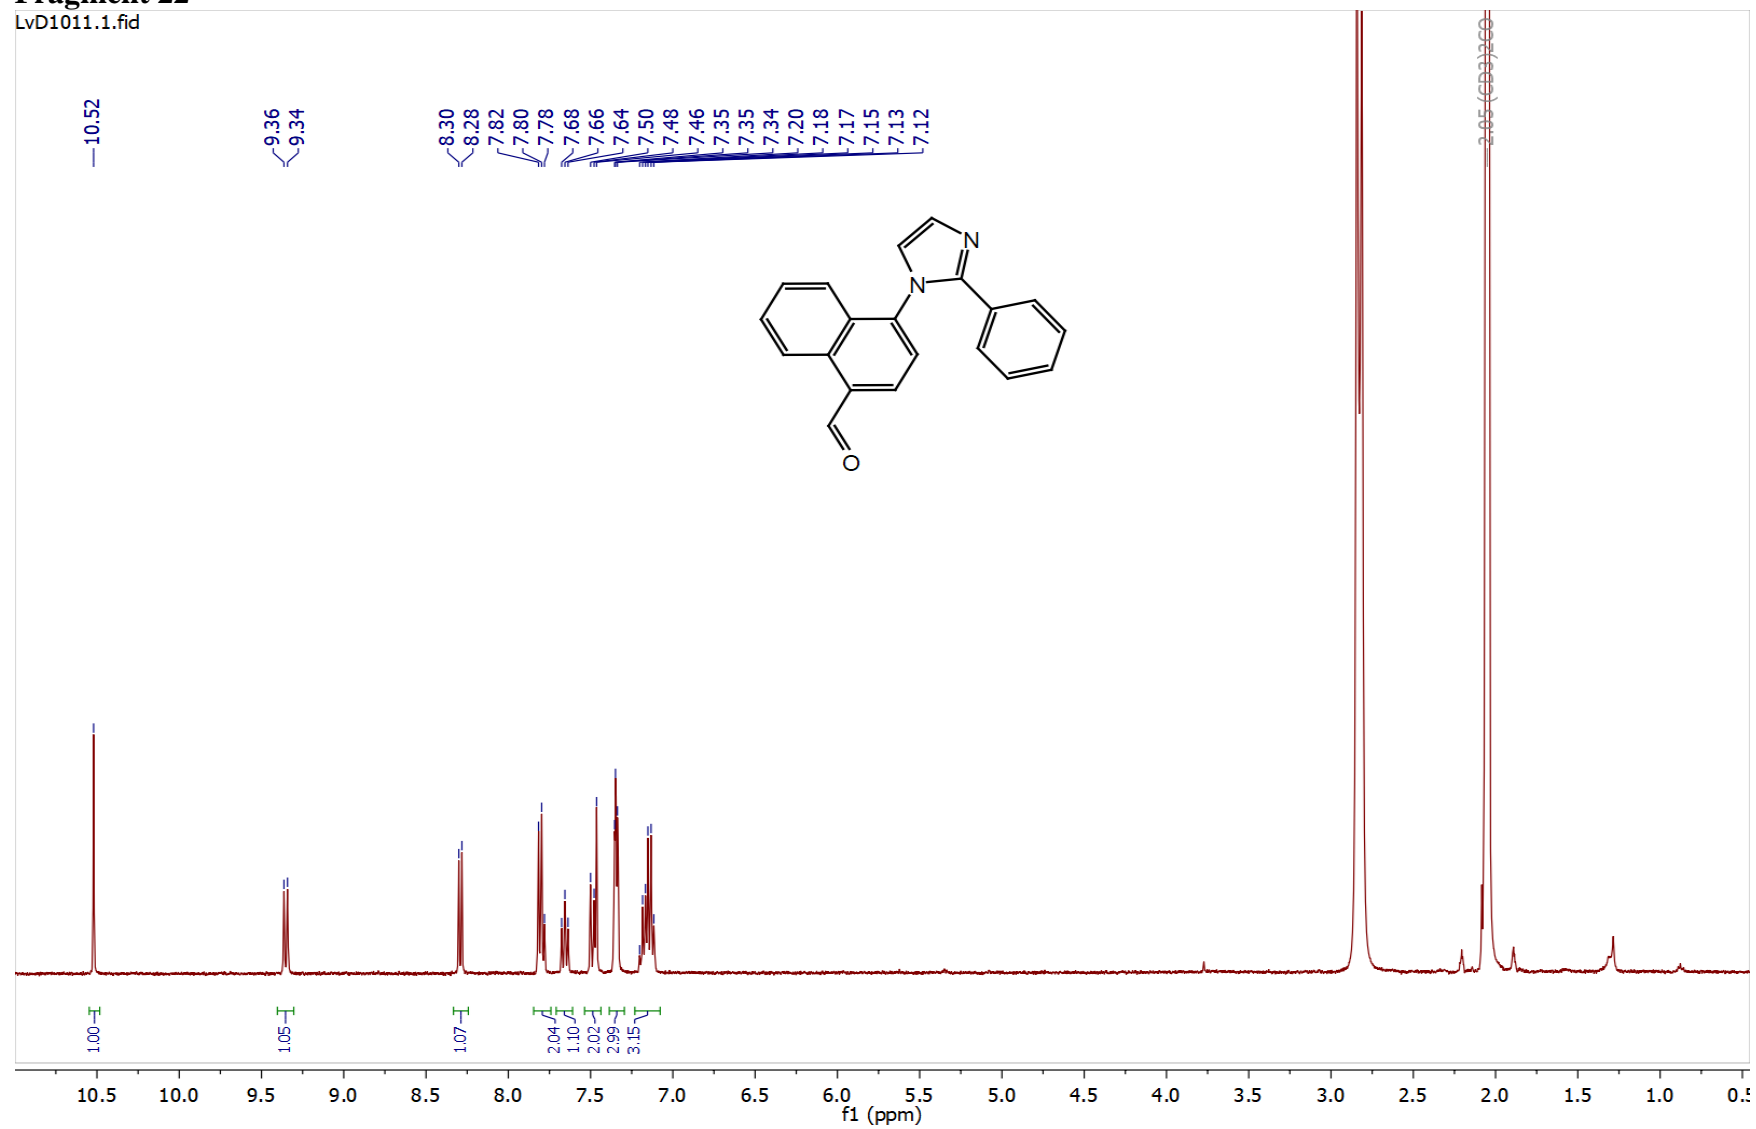

LvD1011\_7Feb.2.fid

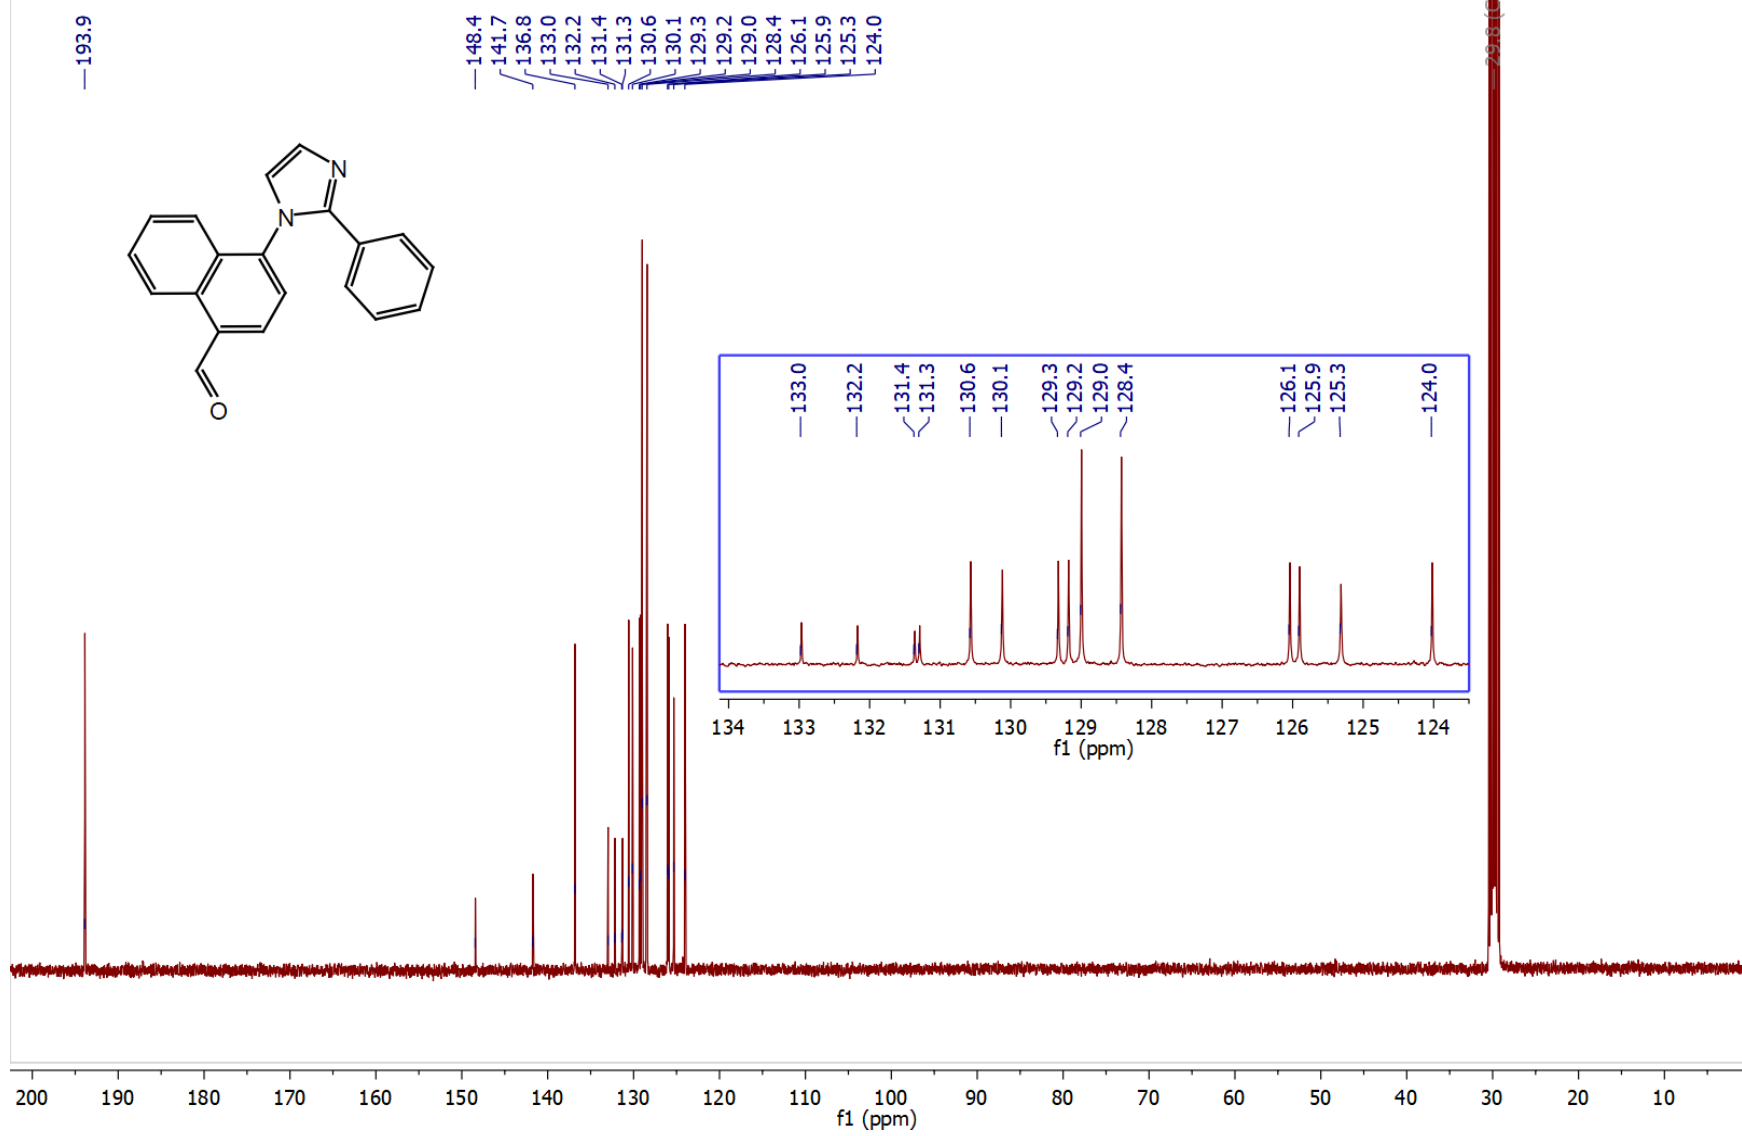

# Fragment 23

PC2046\_FC.1.fid

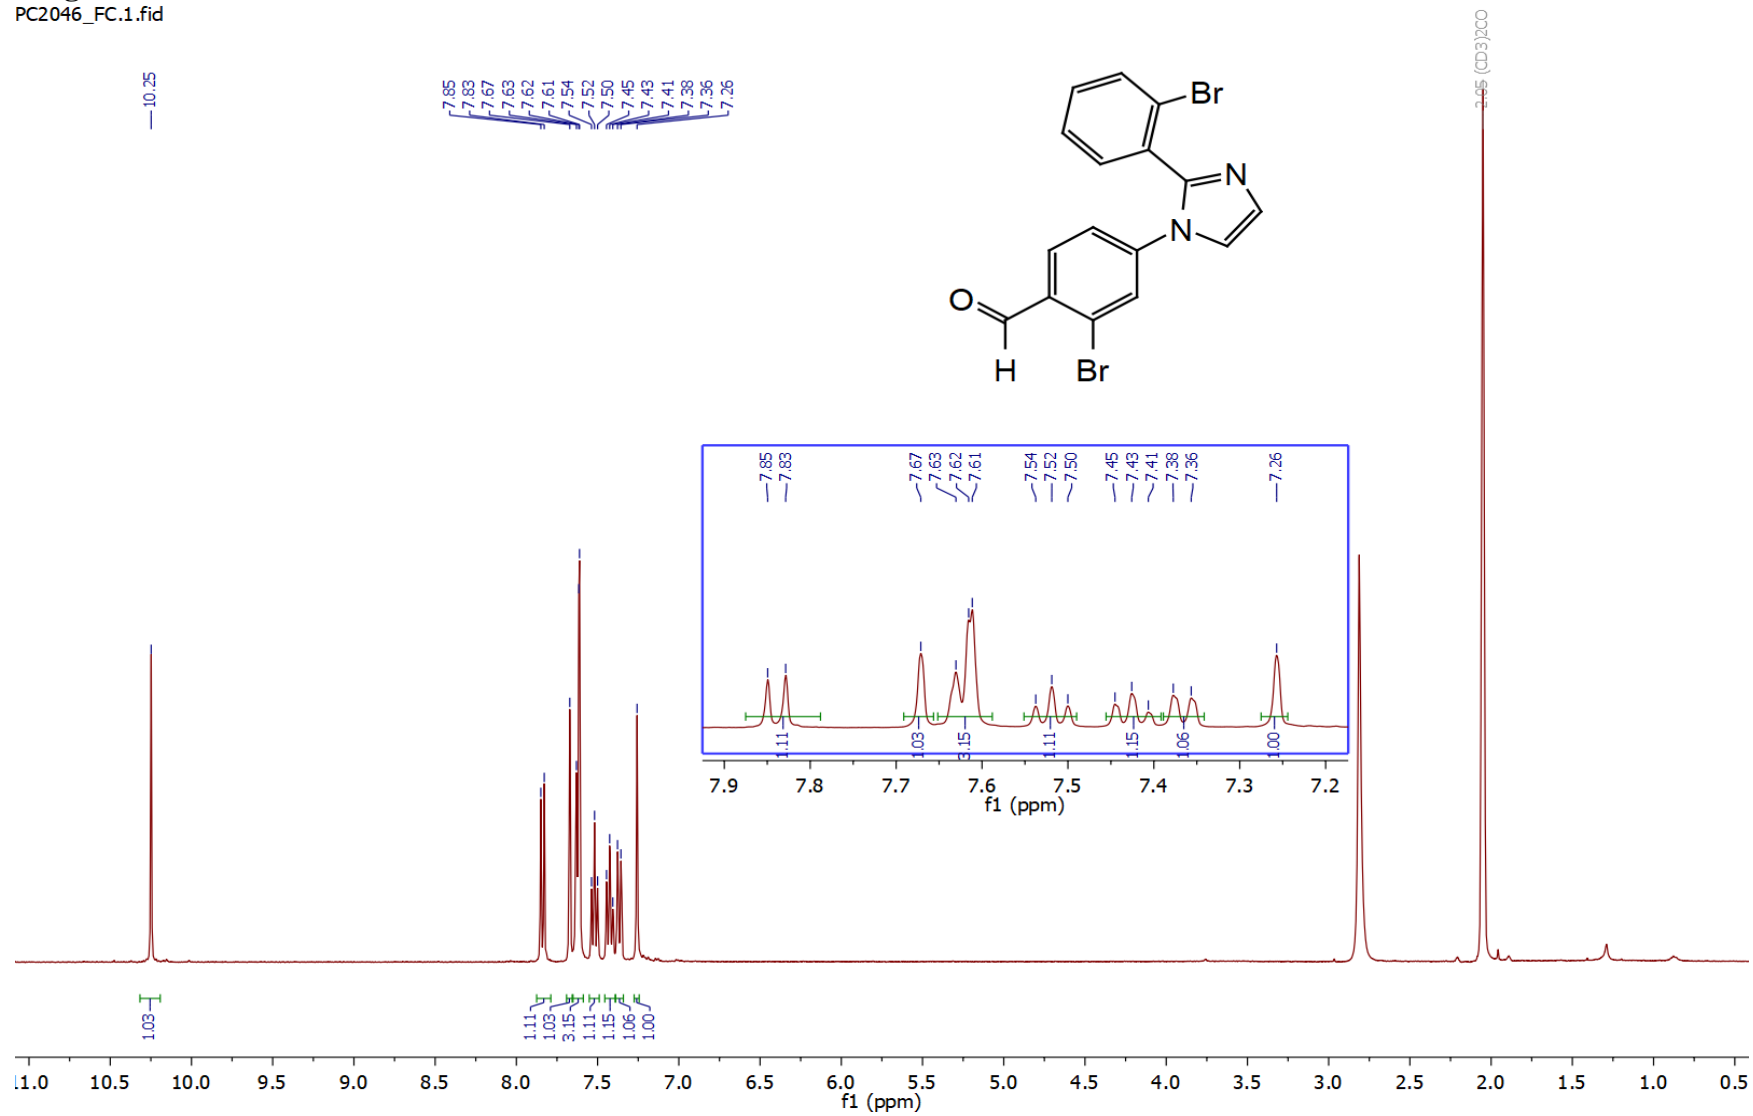

PC2046\_FC.2.fid

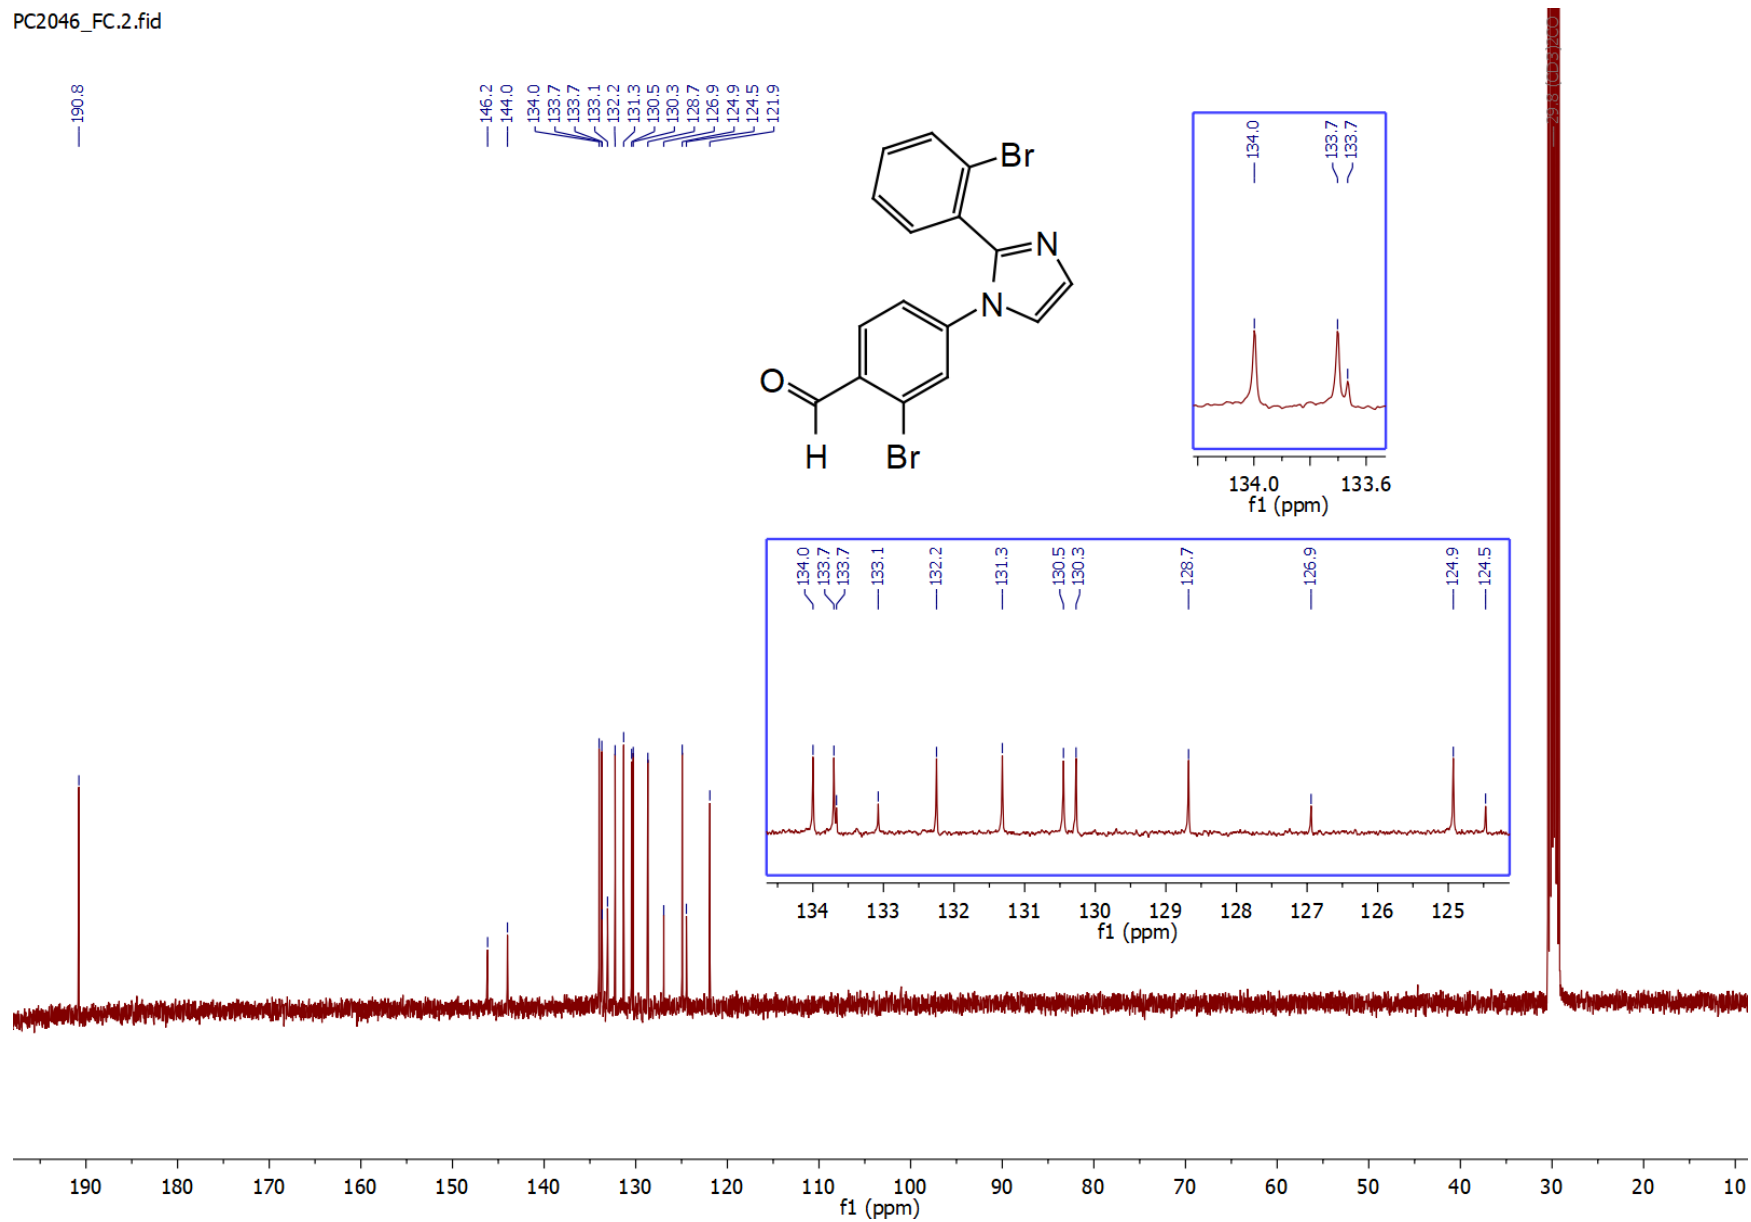

# Fragment 24

PC2048A\_FC.1.fid

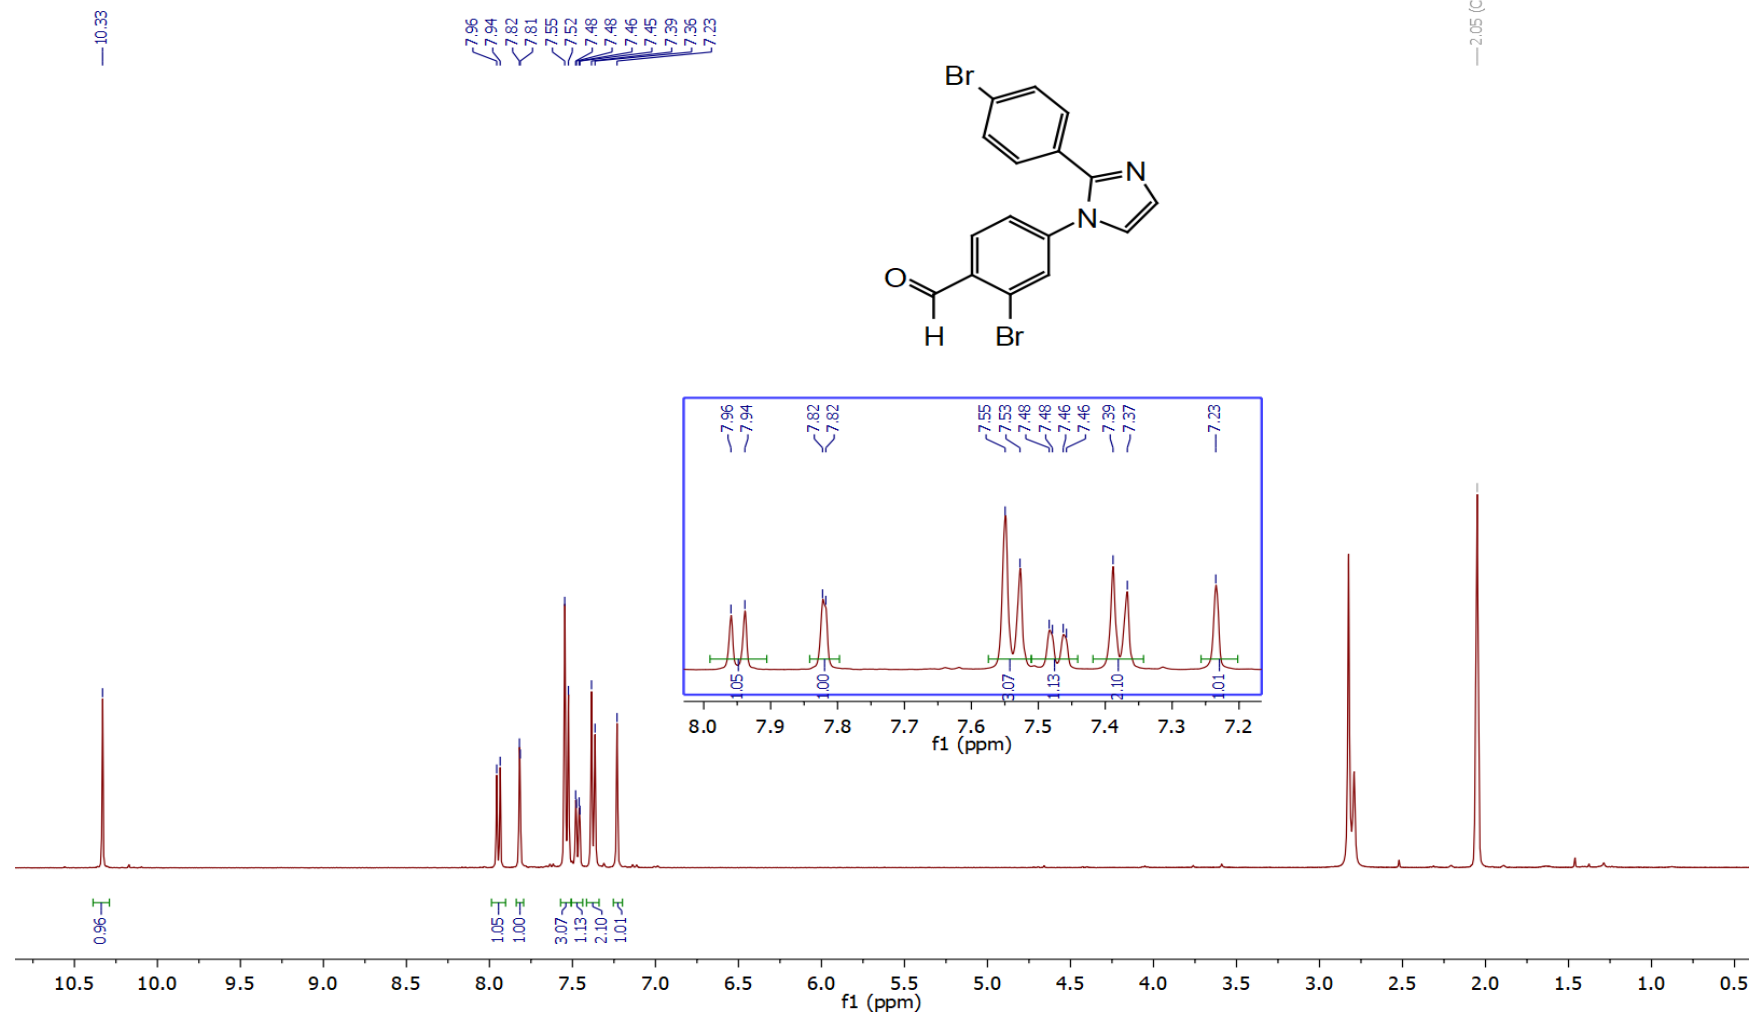

PC2048A\_FC.2.fid

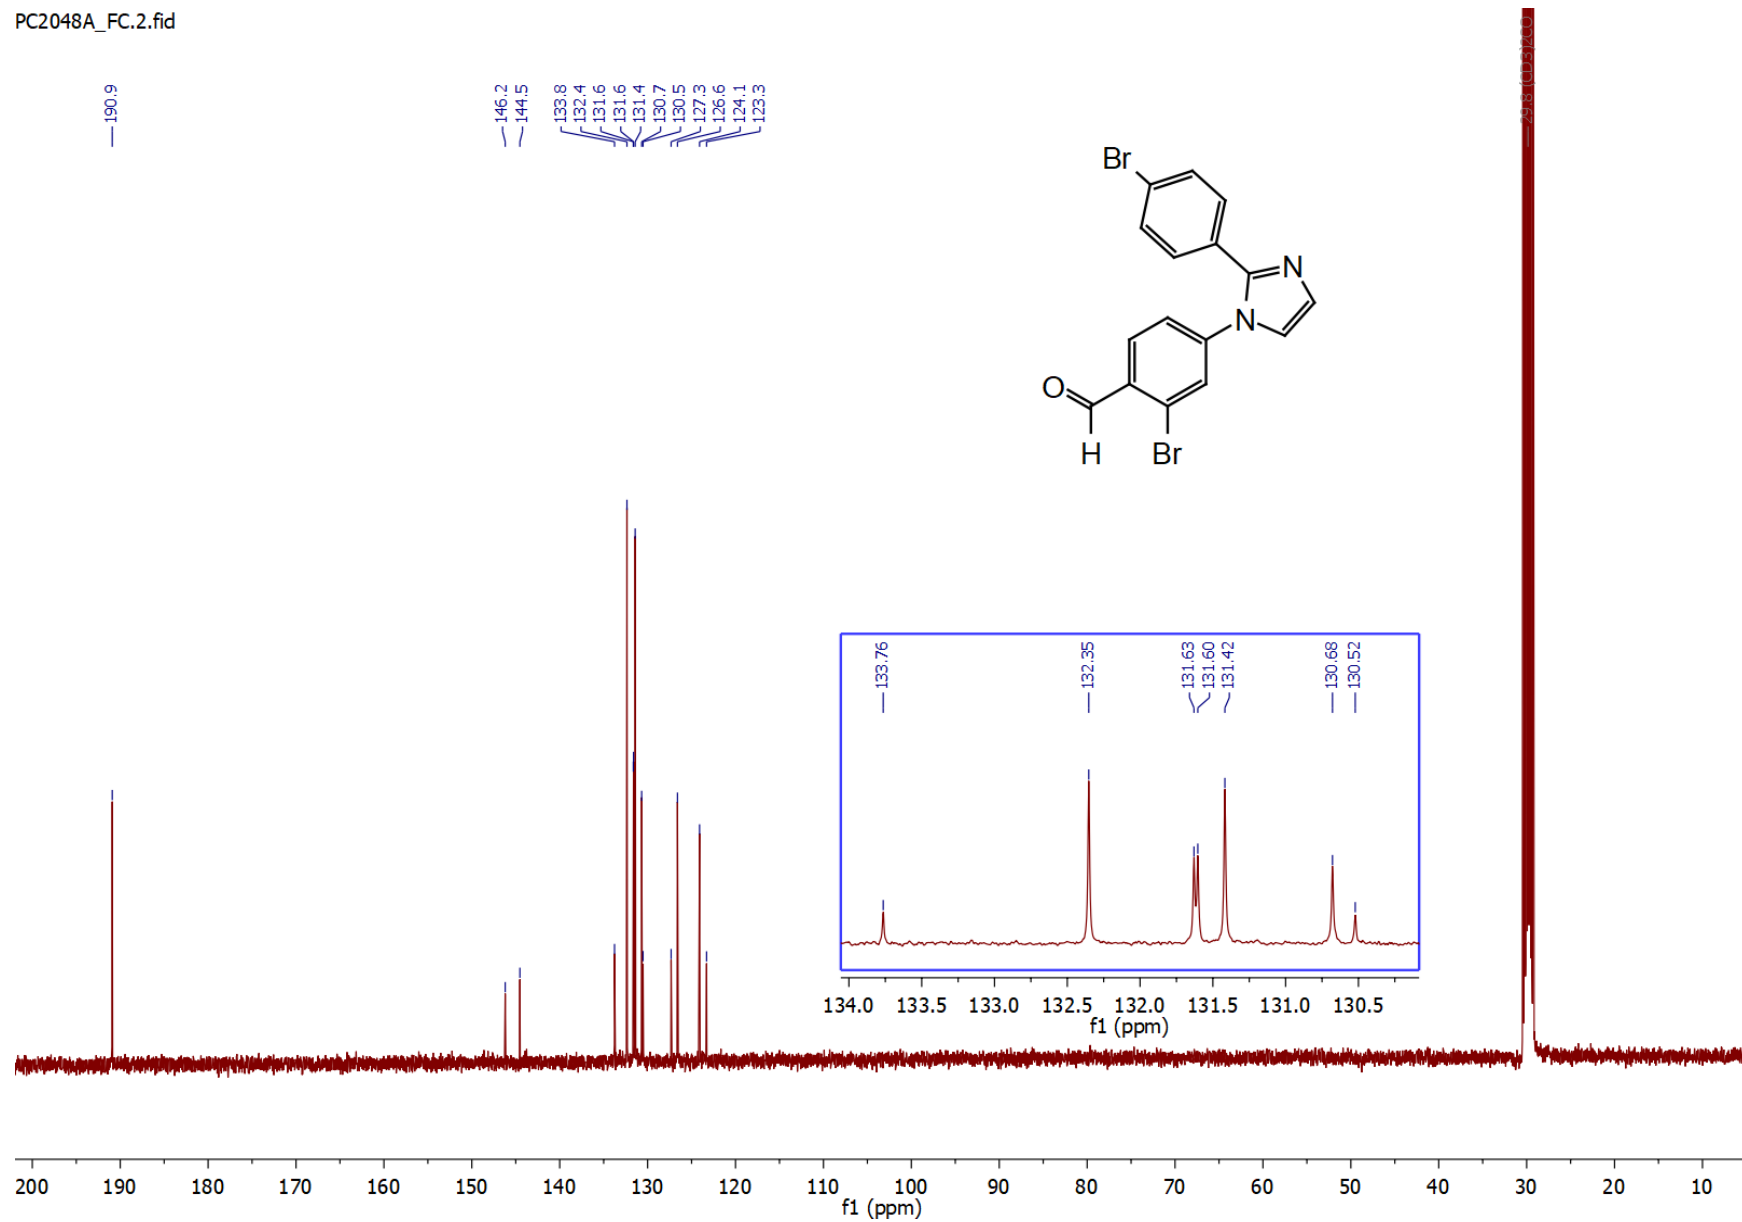

**Fragment 25**  
PC2048B\_FC.1.fid

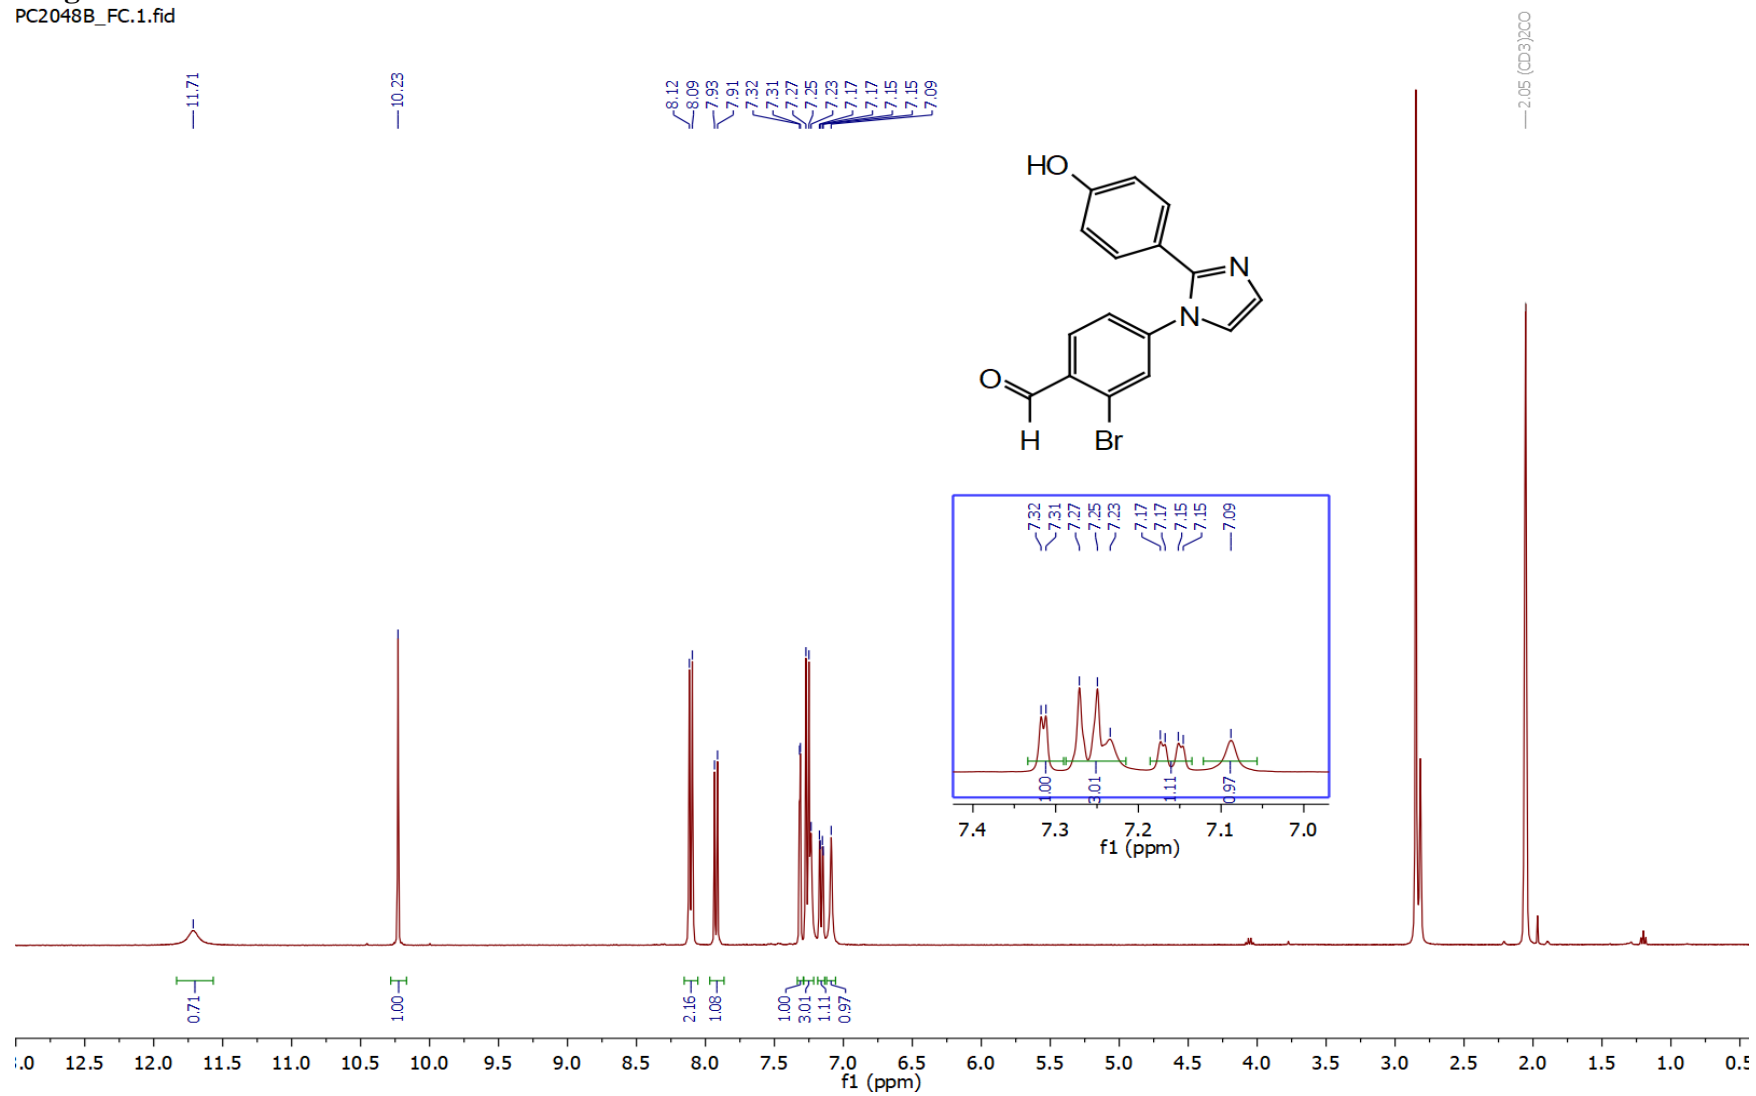

PC2048B\_FC.2.fid

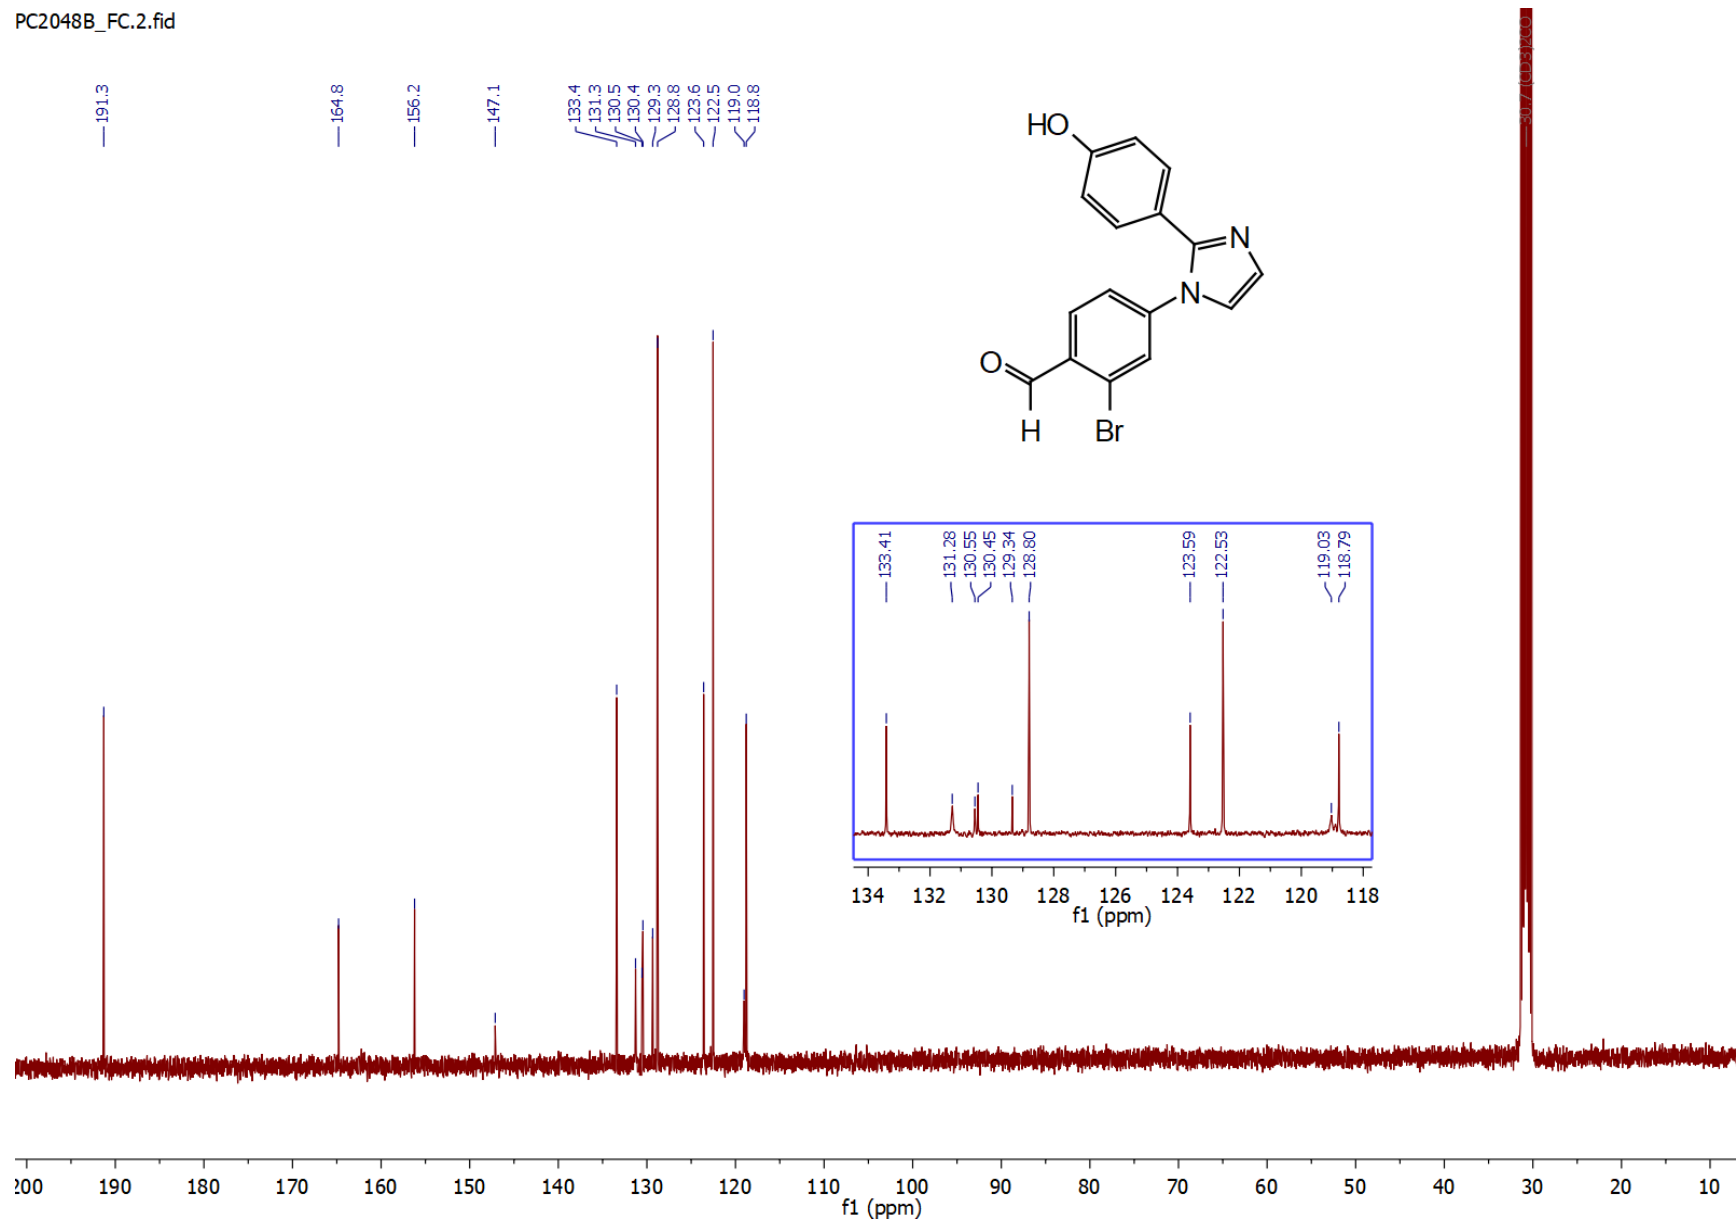



**Fragment 26**  
PC2048C\_FC.1.fid

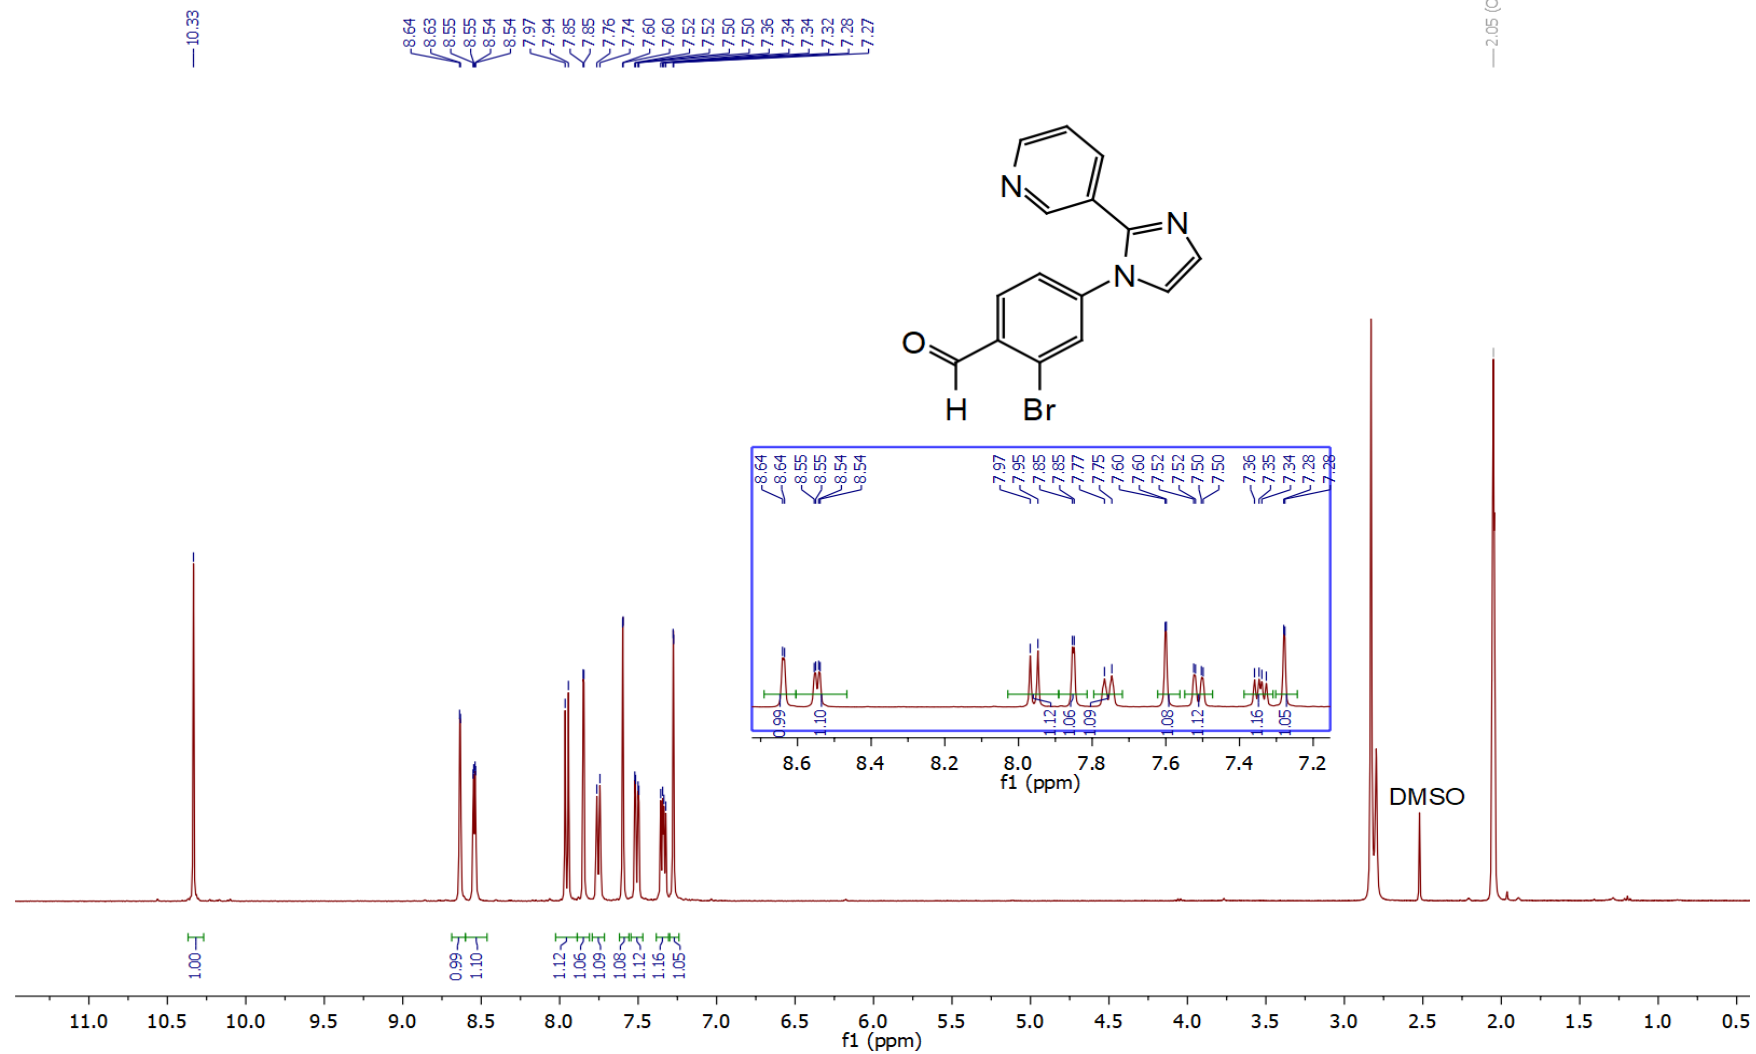

# Fragment 27

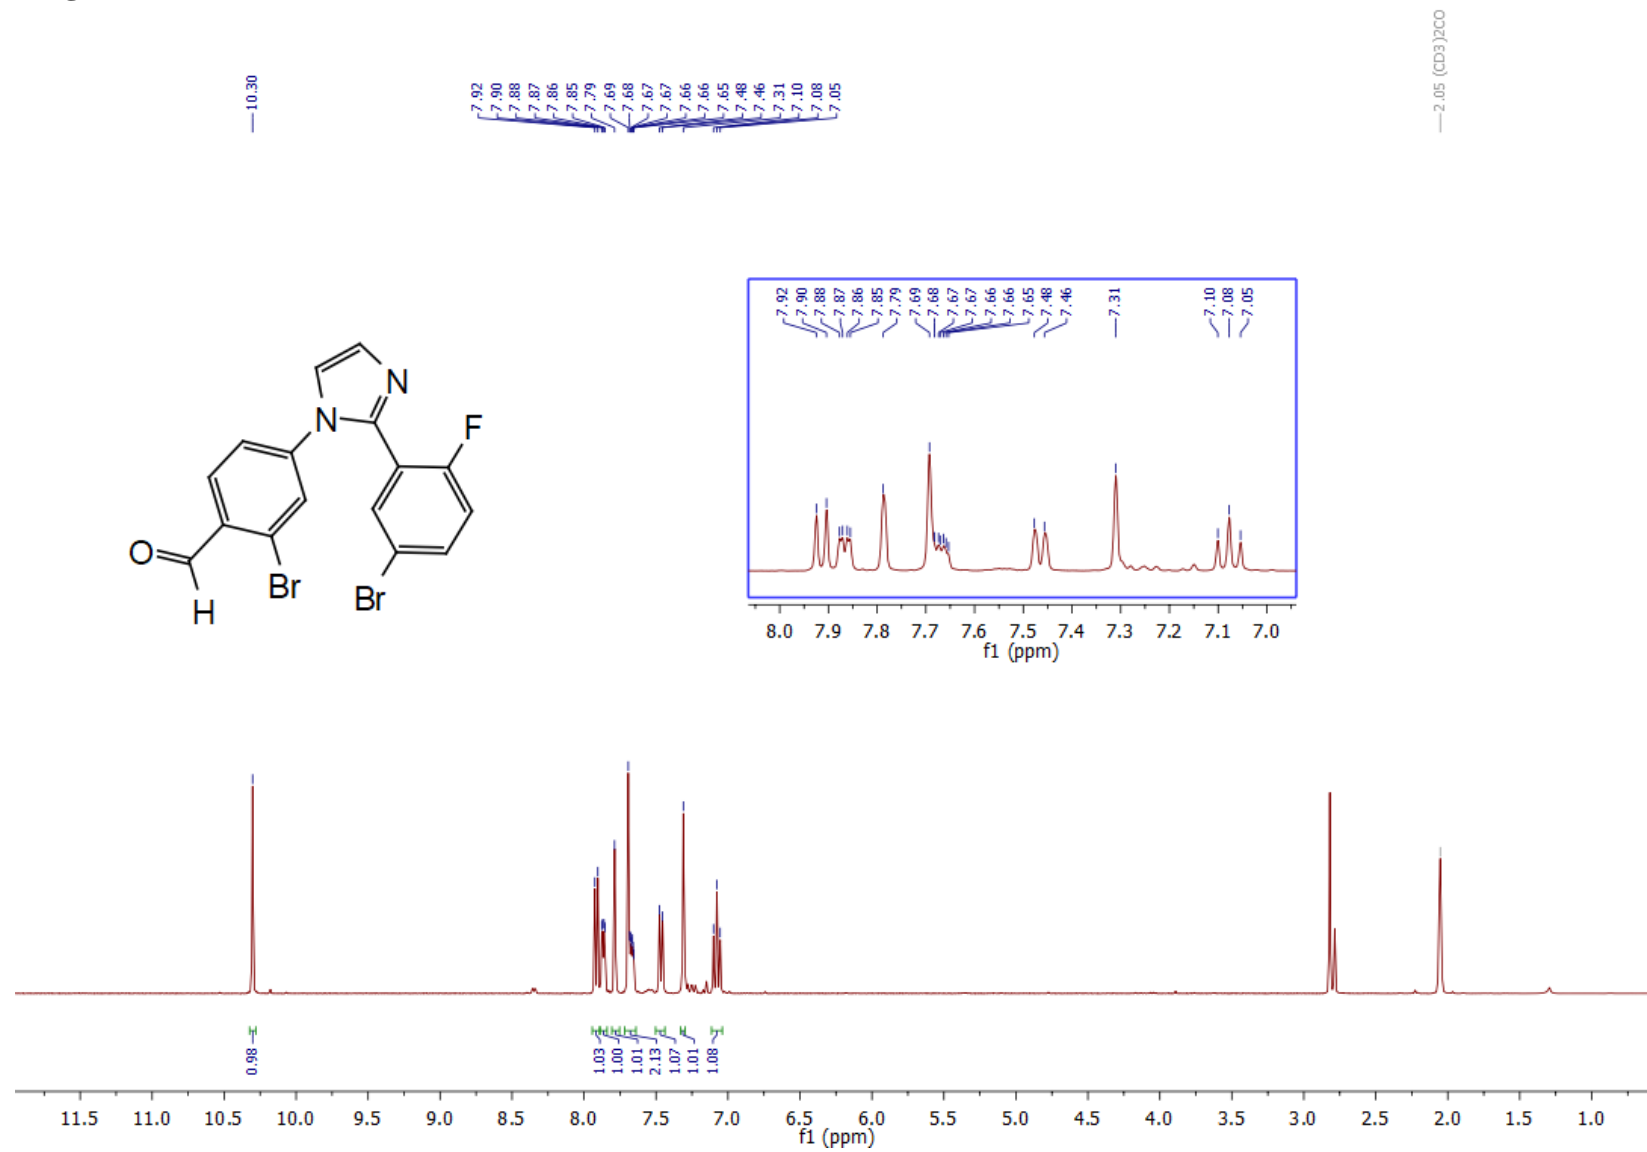

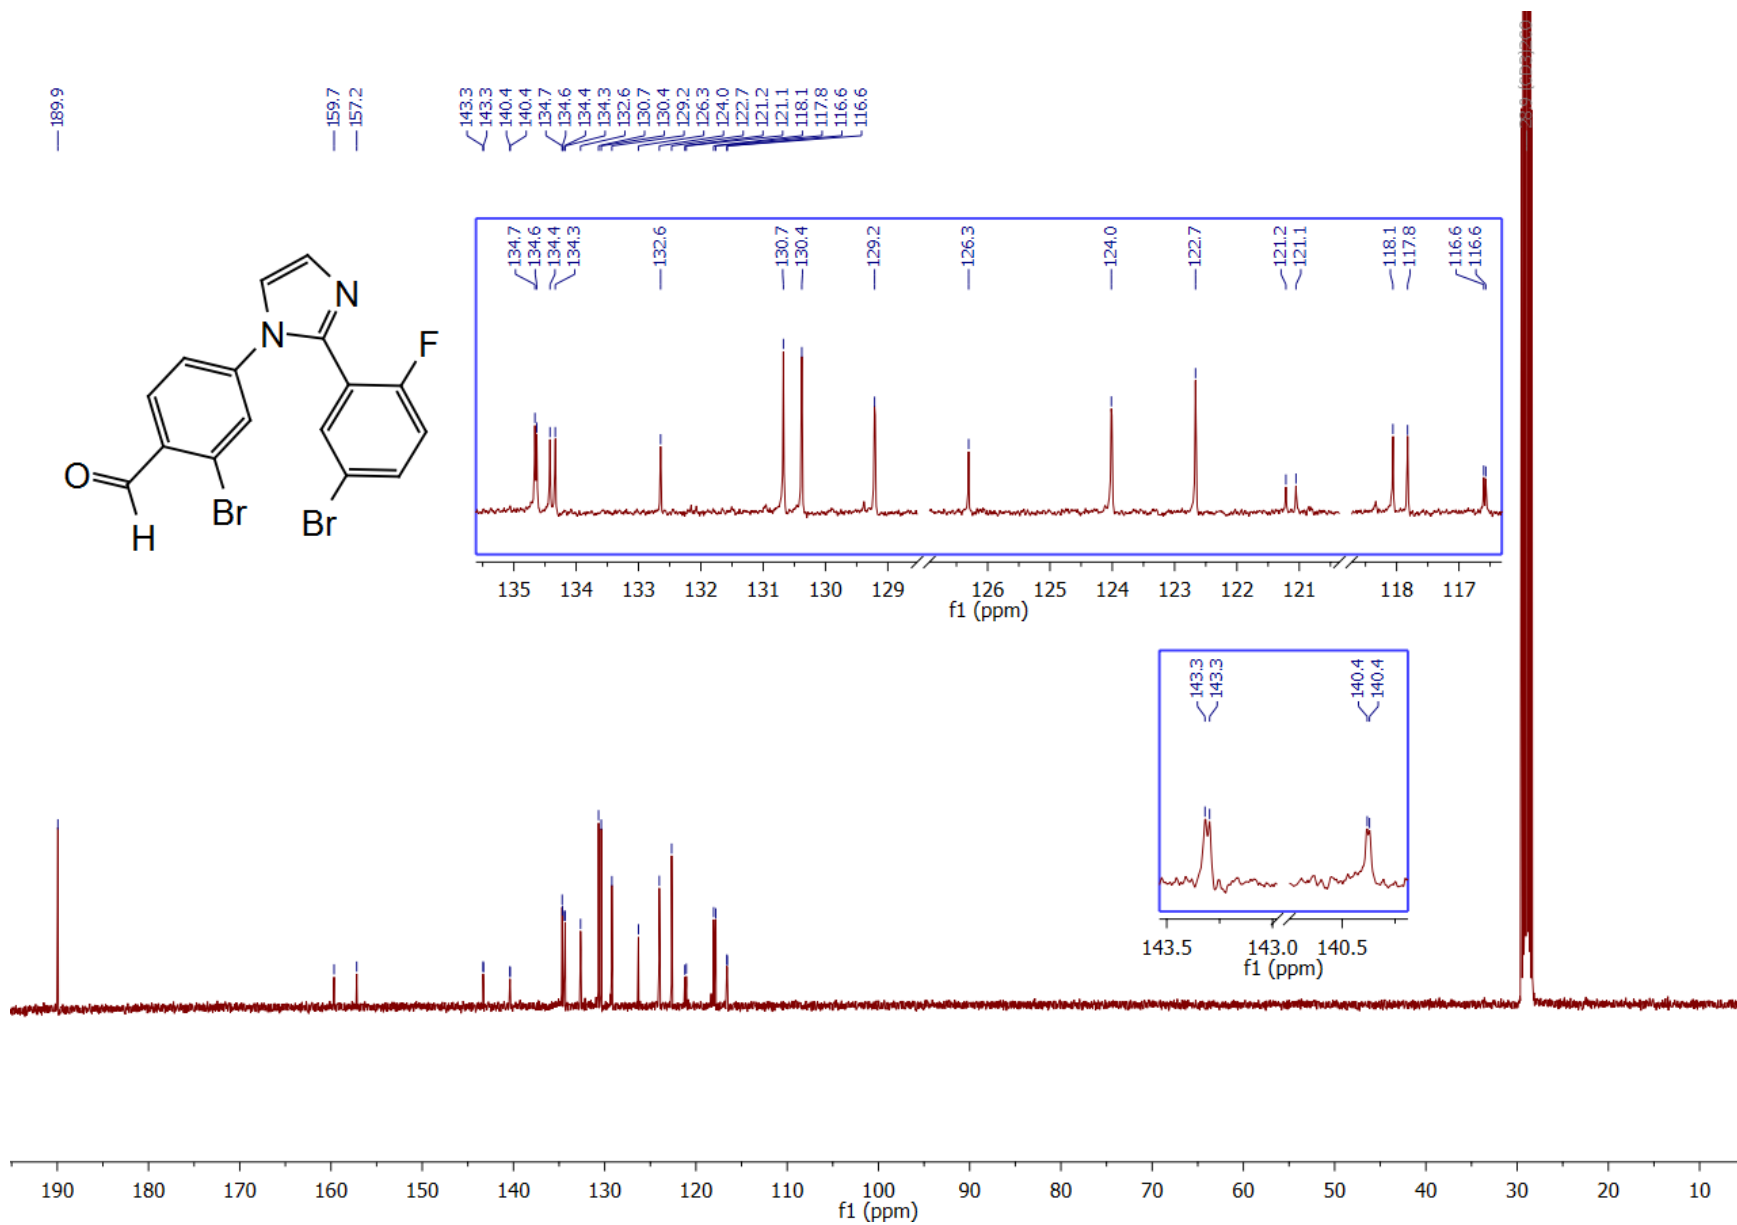

# Fragment 28

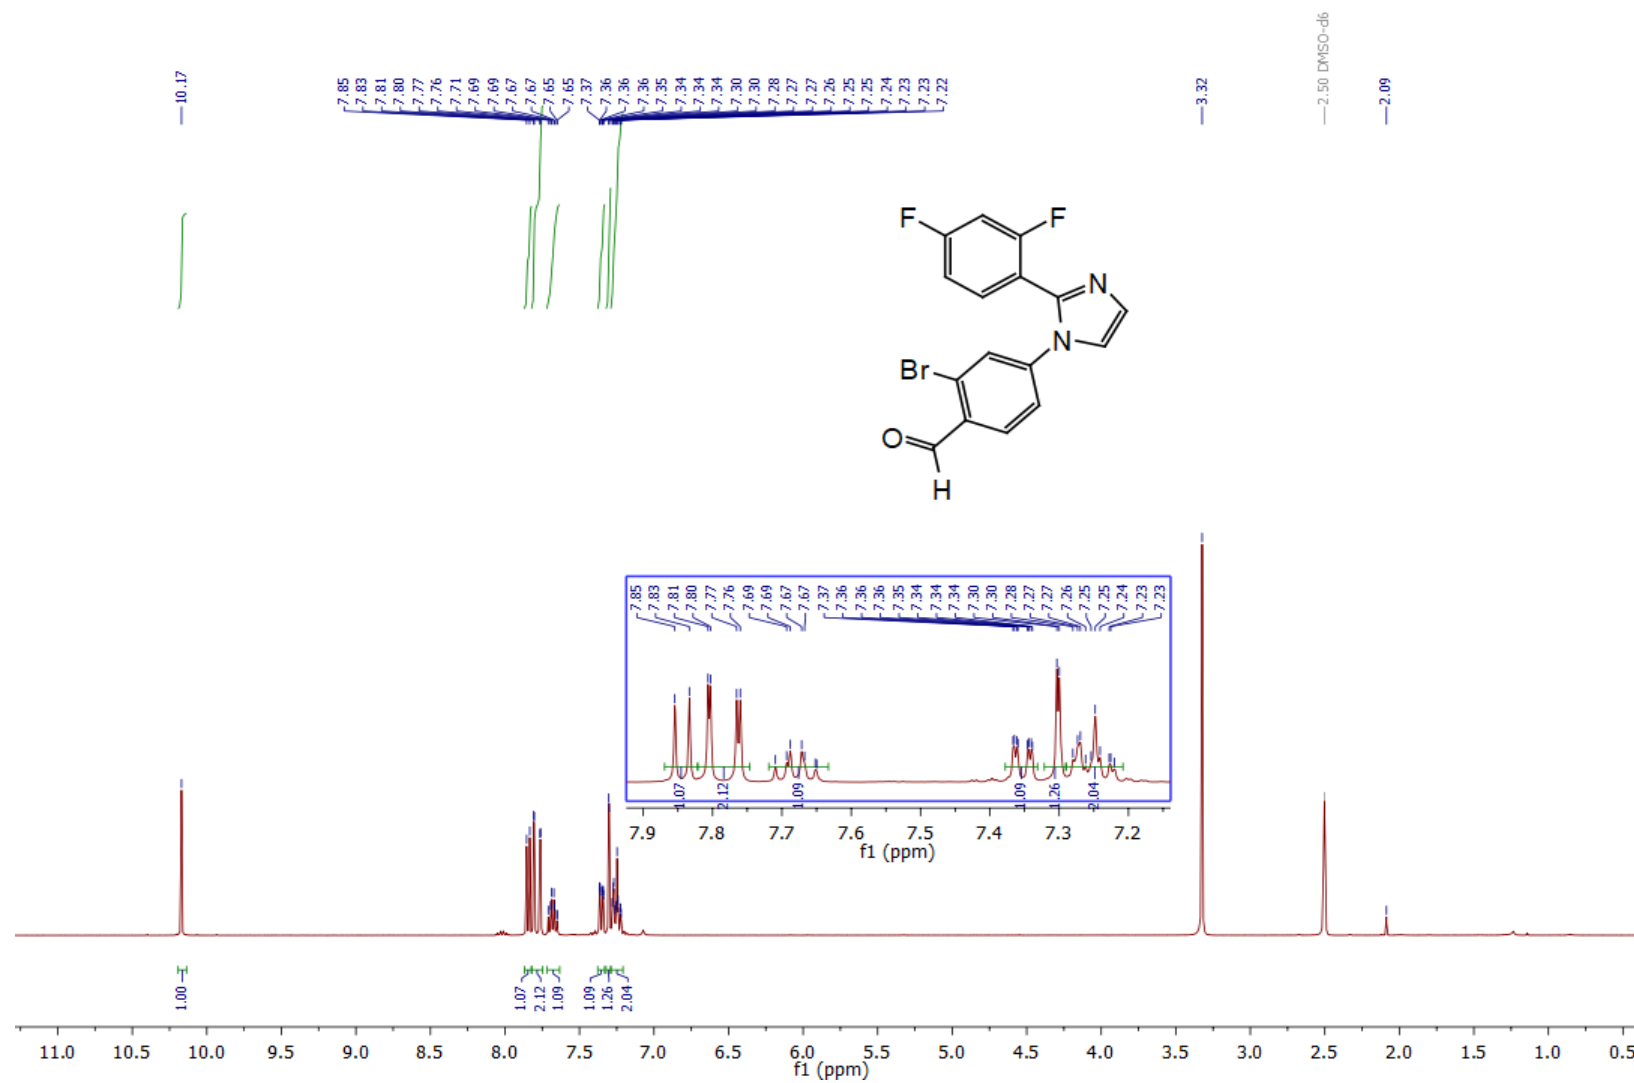

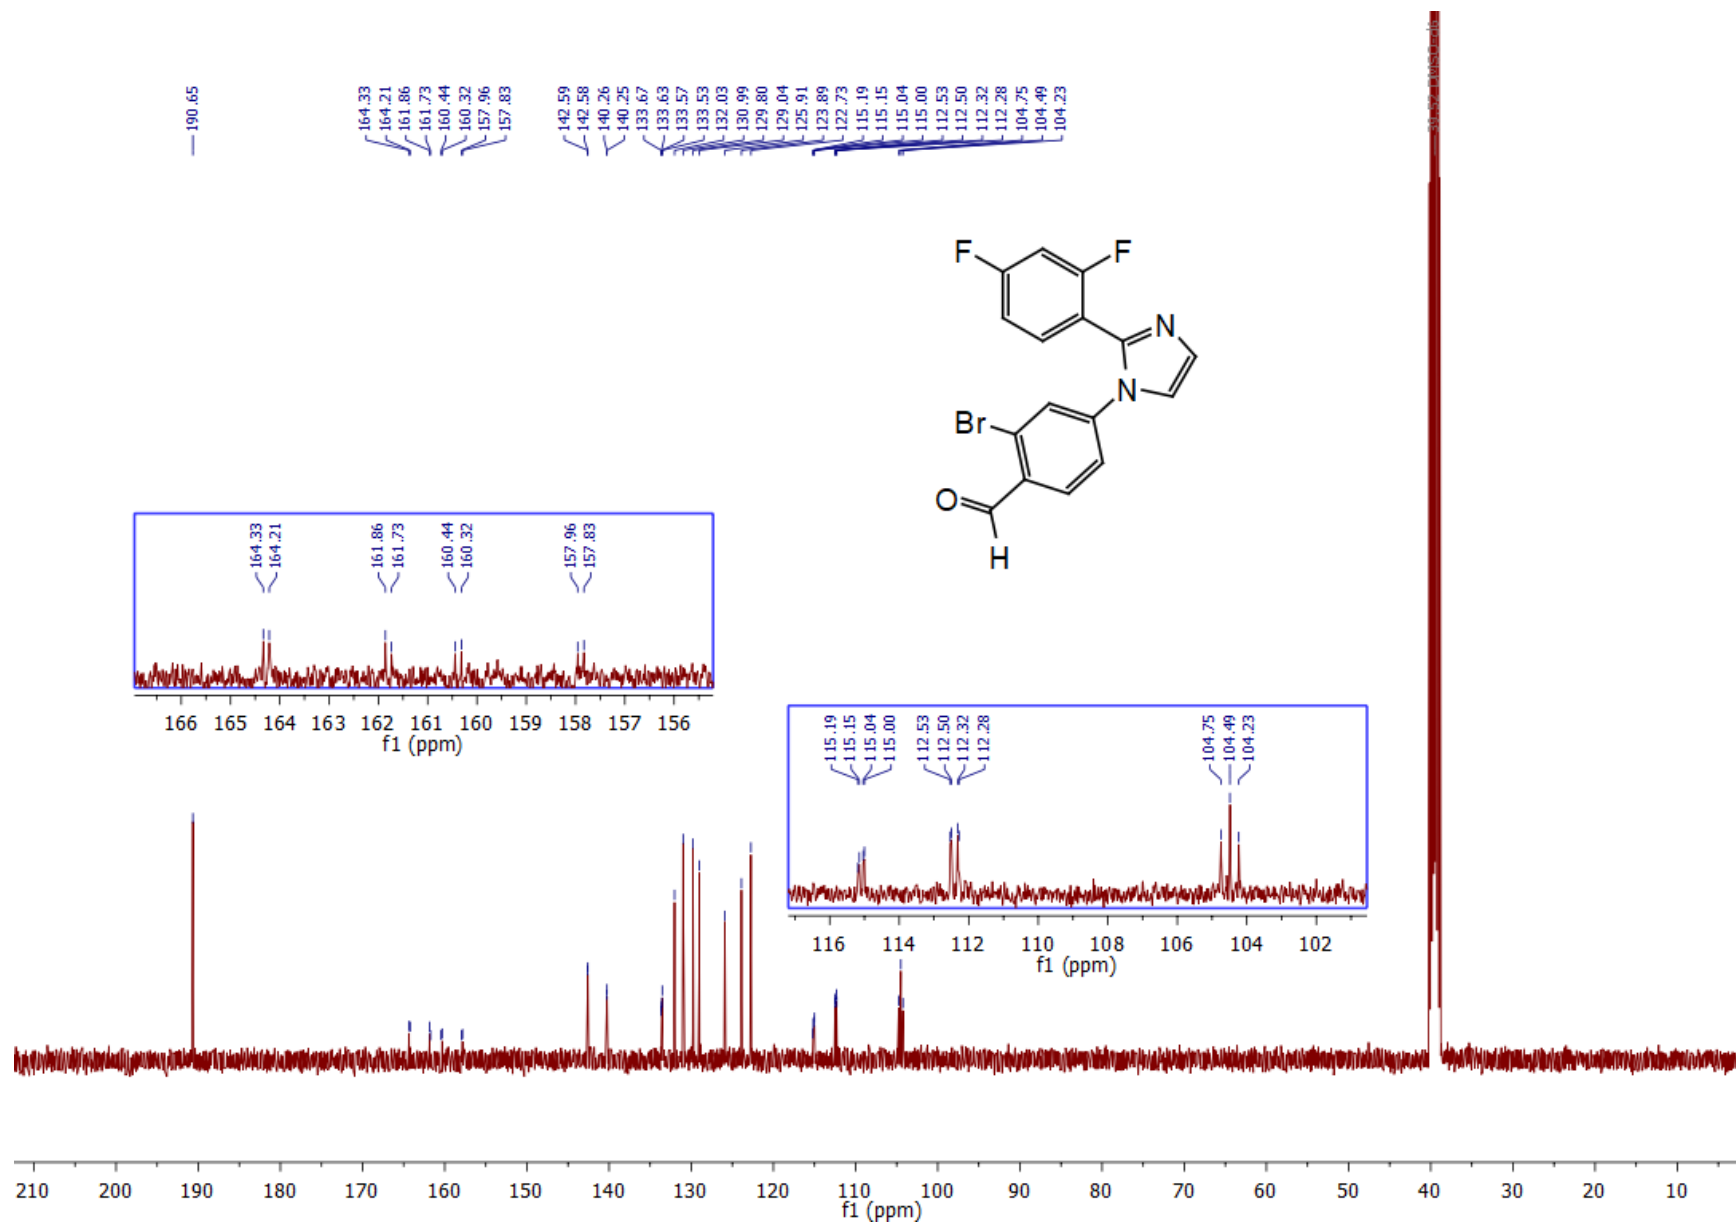

# HPLC

## Fragment 27

D:\data\users\_2021\Peter Cossar\PC2068B  
10

12/03/2021 19:32:29  
D:\methods\Carlo Verhoef\general.meth

RT: 0.00 - 10.00

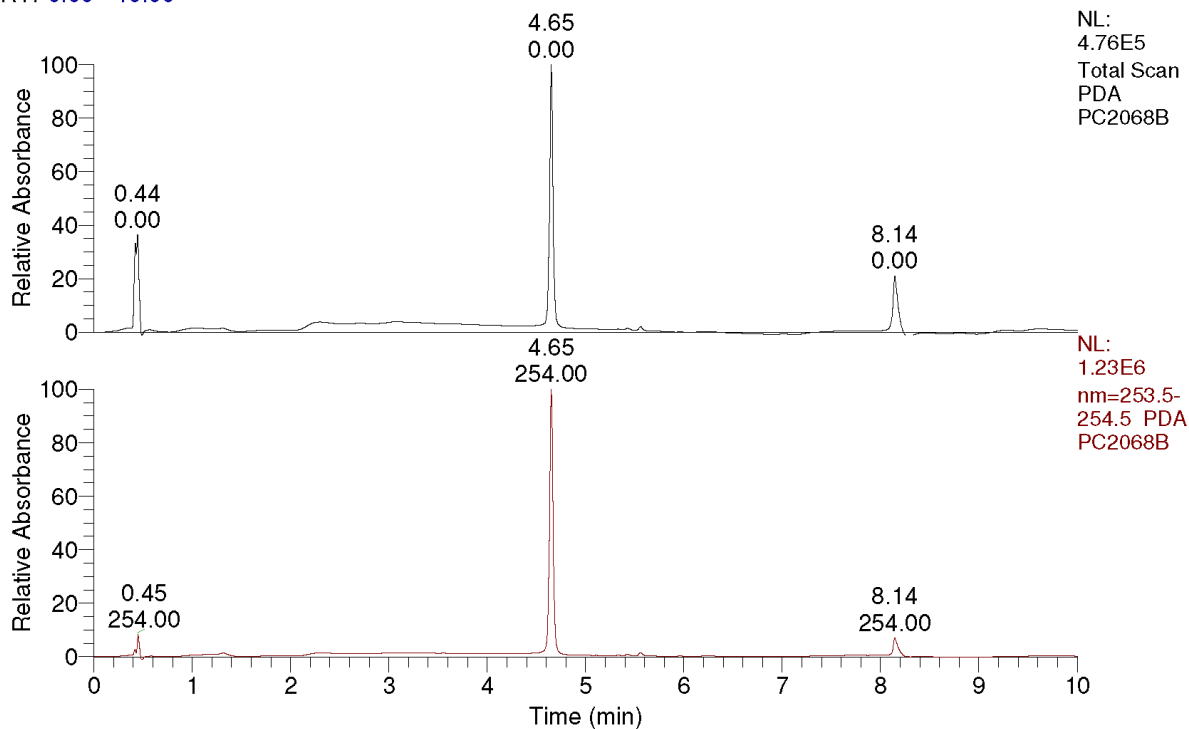

PC2068B #384-414 RT: 4.64-4.88 AV: 31 SB: 18 0.81-1.03 NL: 6.59E4  
T: ITMS + p ESI Full ms [100.00-1000.00]

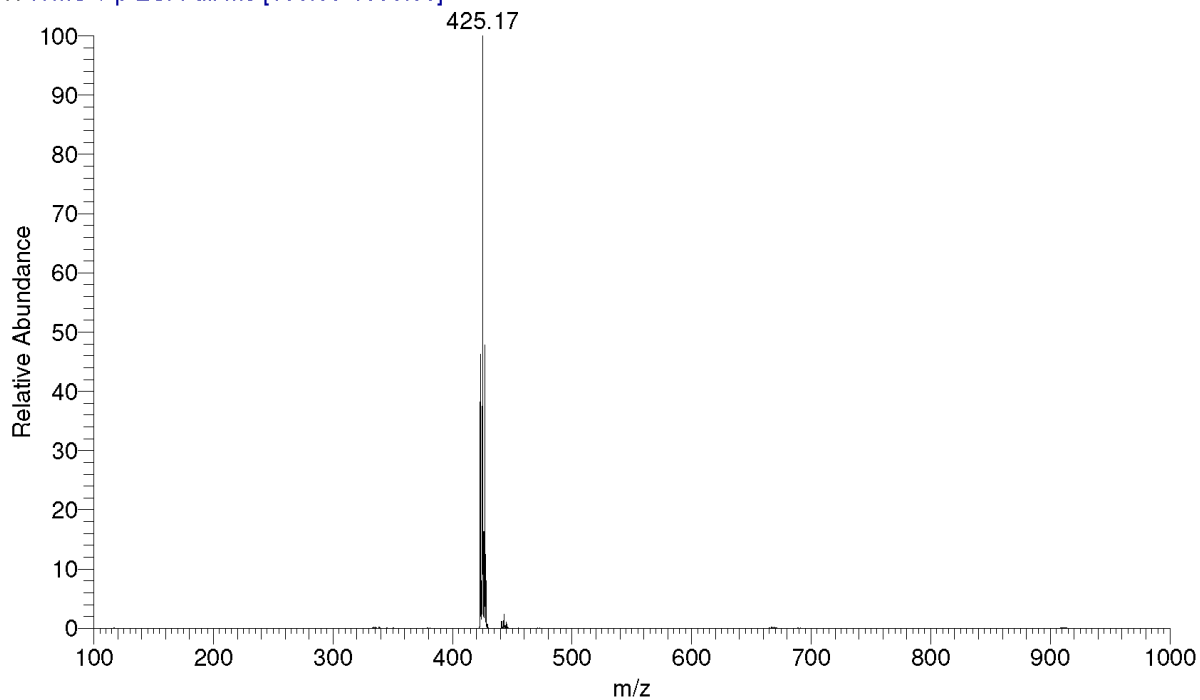

# Fragment 28

D:\data\...\PC2068A\_210504190621  
66

04/05/2021 19:06:21  
D:\methods\general.meth

RT: 0.00 - 10.00

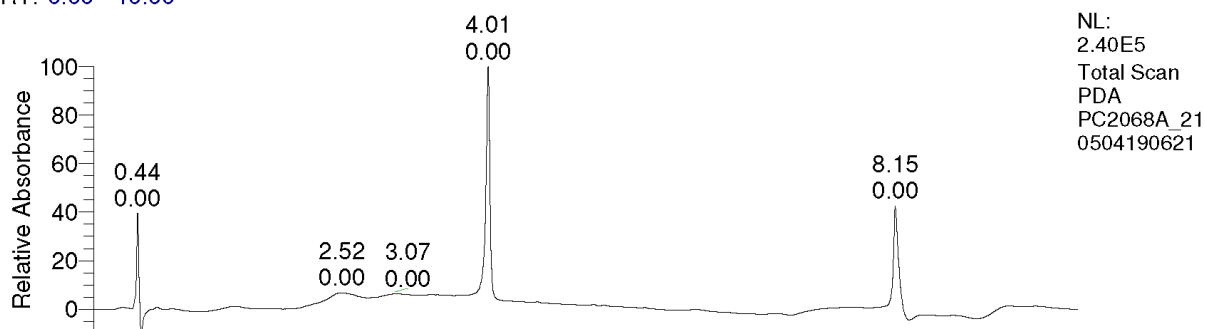

NL:  
2.40E5  
Total Scan  
PDA  
PC2068A\_21  
0504190621

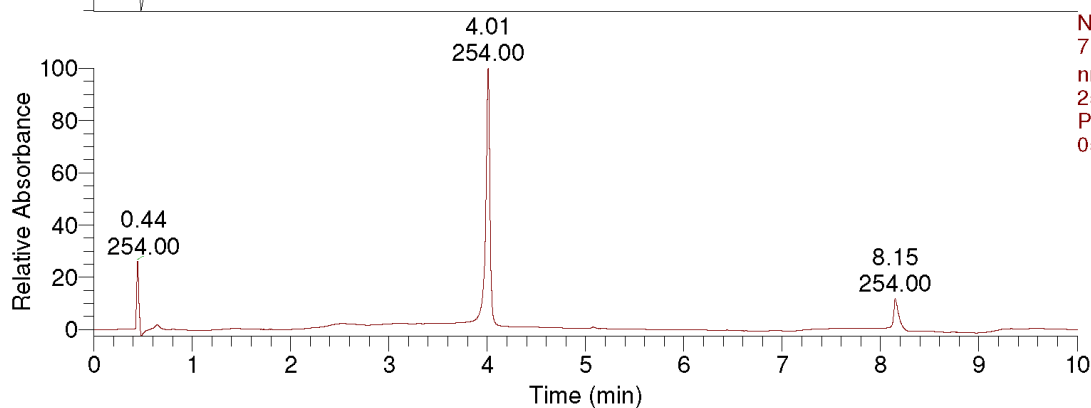

NL:  
7.01E5  
nm=253.5-  
254.5 PDA  
PC2068A\_21  
0504190621

PC2068A\_210504190621 #318-354 RT: 3.91-4.21 AV: 37 SB: 18 0.81-1.03 NL: 2.57E4

T: ITMS + p ESI Full ms [100.00-1000.00]

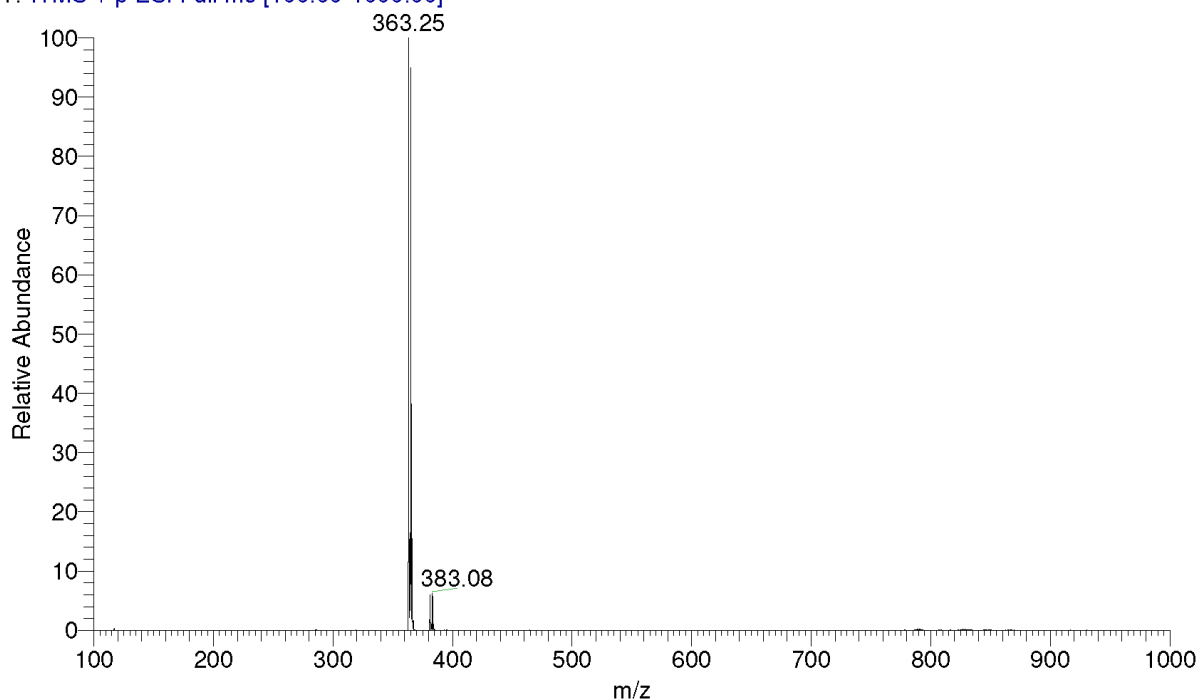

## References

- (1) Clabbers, M. T. B.; Gruene, T.; Parkhurst, J. M.; Abrahams, J. P.; Waterman, D. G. Electron Diffraction Data Processing with DIALS. *Acta Crystallogr. Sect. Struct. Biol.* **2018**, *74* (6), 506–518. <https://doi.org/10.1107/S2059798318007726>.
- (2) Lebedev, A. A.; Vagin, A. A.; Murshudov, G. N. Model Preparation in MOLREP and Examples of Model Improvement Using X-Ray Data. *Acta Crystallogr. D Biol. Crystallogr.* **2008**, *64* (Pt 1), 33–39. <https://doi.org/10.1107/S0907444907049839>.
- (3) Vagin, A.; Teplyakov, A. Molecular Replacement with MOLREP. *Acta Crystallogr. D Biol. Crystallogr.* **2010**, *66* (1), 22–25. <https://doi.org/10.1107/S0907444909042589>.
- (4) Emsley, P.; Cowtan, K. Coot: Model-Building Tools for Molecular Graphics. *Acta Crystallogr. D Biol. Crystallogr.* **2004**, *60* (12), 2126–2132. <https://doi.org/10.1107/S0907444904019158>.
- (5) Murshudov, G. N.; Skubák, P.; Lebedev, A. A.; Pannu, N. S.; Steiner, R. A.; Nicholls, R. A.; Winn, M. D.; Long, F.; Vagin, A. A. REFMAC5 for the Refinement of Macromolecular Crystal Structures. *Acta Crystallogr. D Biol. Crystallogr.* **2011**, *67* (Pt 4), 355–367. <https://doi.org/10.1107/S0907444911001314>.
- (6) Adams, P. D.; Afonine, P. V.; Bunkóczi, G.; Chen, V. B.; Davis, I. W.; Echols, N.; Headd, J. J.; Hung, L.-W.; Kapral, G. J.; Grosse-Kunstleve, R. W.; McCoy, A. J.; Moriarty, N. W.; Oeffner, R.; Read, R. J.; Richardson, D. C.; Richardson, J. S.; Terwilliger, T. C.; Zwart, P. H. PHENIX: A Comprehensive Python-Based System for Macromolecular Structure Solution. *Acta Crystallogr. D Biol. Crystallogr.* **2010**, *66* (2), 213–221. <https://doi.org/10.1107/S0907444909052925>.
- (7) Wolter, M.; de Vink, P.; Neves, J. F.; Srdanovic, S.; Higuchi, Y.; Kato, N.; Wilson, A. J.; Landrieu, I.; Brunsveld, L.; Ottmann, C. Selectivity via Cooperativity: Preferential Stabilization of the P65/14-3-3 Interaction with Semi-Synthetic Natural Products. *J. Am. Chem. Soc.* **2020**, *142* (27), 11772–11783. <https://doi.org/10.1021/jacs.0c02151>.
- (8) Vink, P. J. de; Andrei, S. A.; Higuchi, Y.; Ottmann, C.; Milroy, L.-G.; Brunsveld, L. Cooperativity Basis for Small-Molecule Stabilization of Protein–Protein Interactions. *Chem. Sci.* **2019**, *10* (10), 2869–2874. <https://doi.org/10.1039/C8SC05242E>.
- (9) Stevers, L. M.; Lam, C. V.; Leysen, S. F. R.; Meijer, F. A.; van Scheppingen, D. S.; de Vries, R. M. J. M.; Carlile, G. W.; Milroy, L. G.; Thomas, D. Y.; Brunsveld, L.; Ottmann, C. Characterization and Small-Molecule Stabilization of the Multisite Tandem Binding between 14-3-3 and the R Domain of CFTR. *Proc. Natl. Acad. Sci. U. S. A.* **2016**, *113* (9), E1152–1161. <https://doi.org/10.1073/pnas.1516631113>.
- (10) Sijbesma, E.; Somsen, B. A.; Miley, G. P.; Leijten-van de Gevel, I. A.; Brunsveld, L.; Arkin, M. R.; Ottmann, C. Fluorescence Anisotropy-Based Tethering for Discovery of Protein–Protein Interaction Stabilizers. *ACS Chem. Biol.* **2020**, *15* (12), 3143–3148. <https://doi.org/10.1021/acscchembio.0c00646>.
